# Supplementary material
Source: PubMed Central journal article supplement (PMC3806629)
Supplement: NIHMS513878-supplement-1.pdf [file NIHMS513878-supplement-1.pdf]

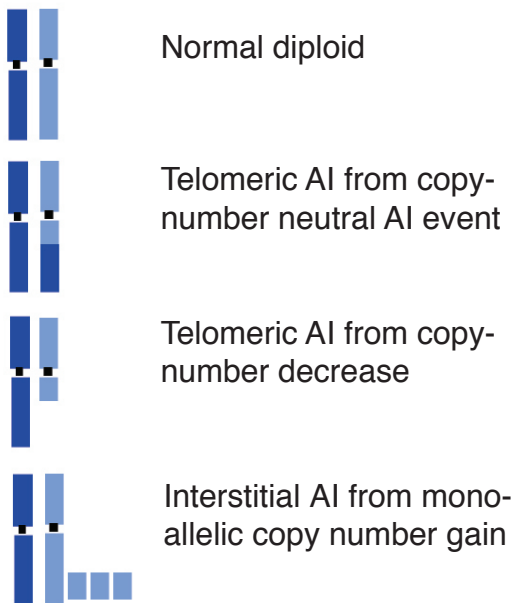

**Figure S1. Definition of allelic imbalance.**

The diagram shows normal bi-allelic chromosomes and three different ways in which allelic imbalance of a chromosomal region may occur.

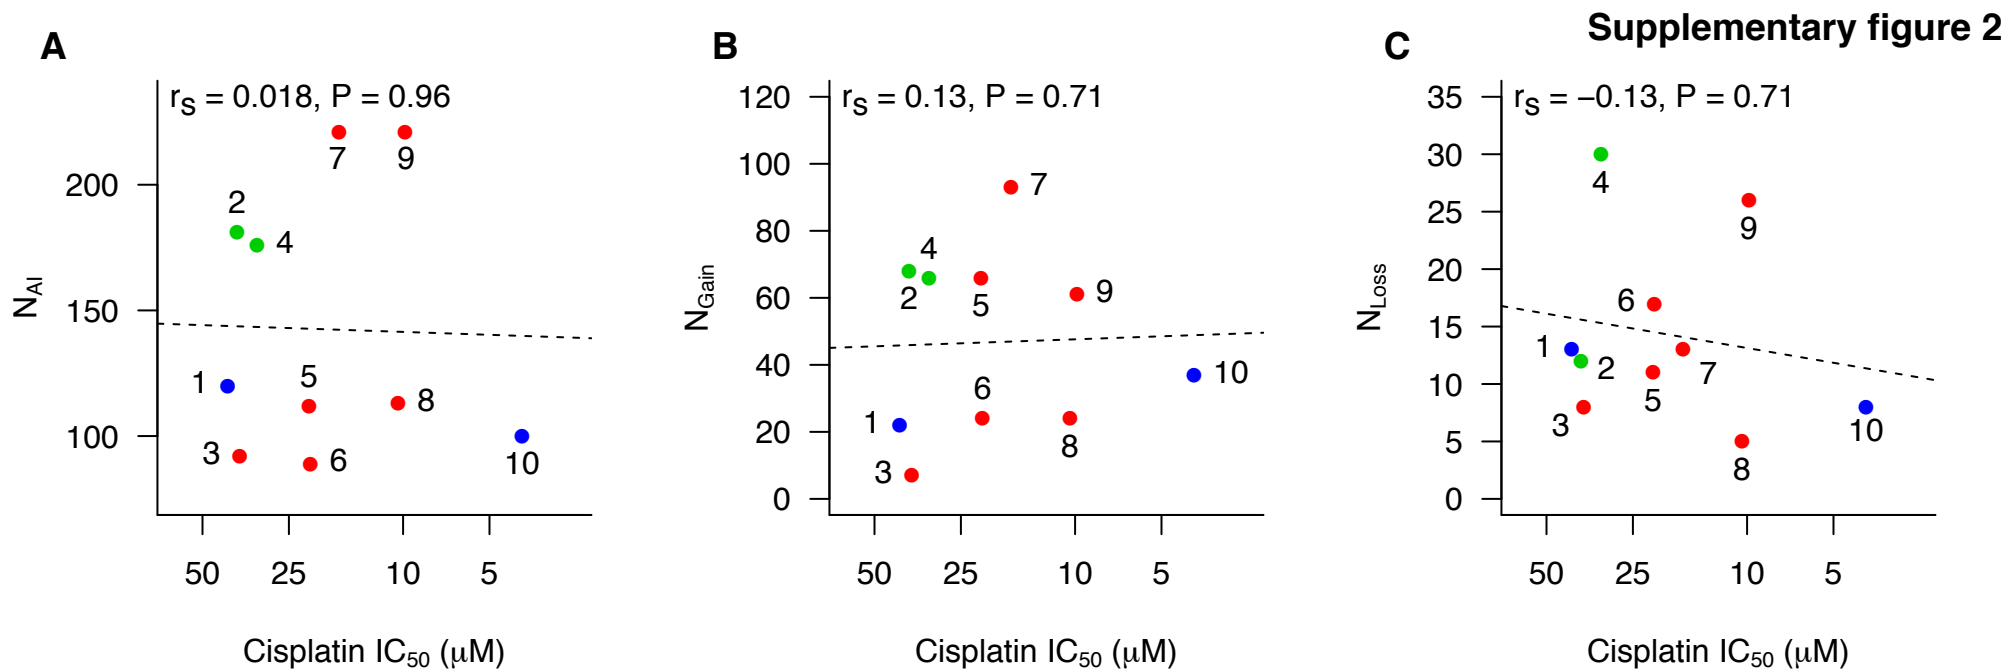

**Figure S2. Association between cisplatin sensitivity and measures of genomic abnormalities in a panel of breast cancer cell lines.** Cisplatin  $IC_{50}$  versus: **A.** total number of AI regions. **B.** total number of copy number gain regions. **C.** total number of copy number loss regions. Numbers represents the same cell lines as in Figure 1.

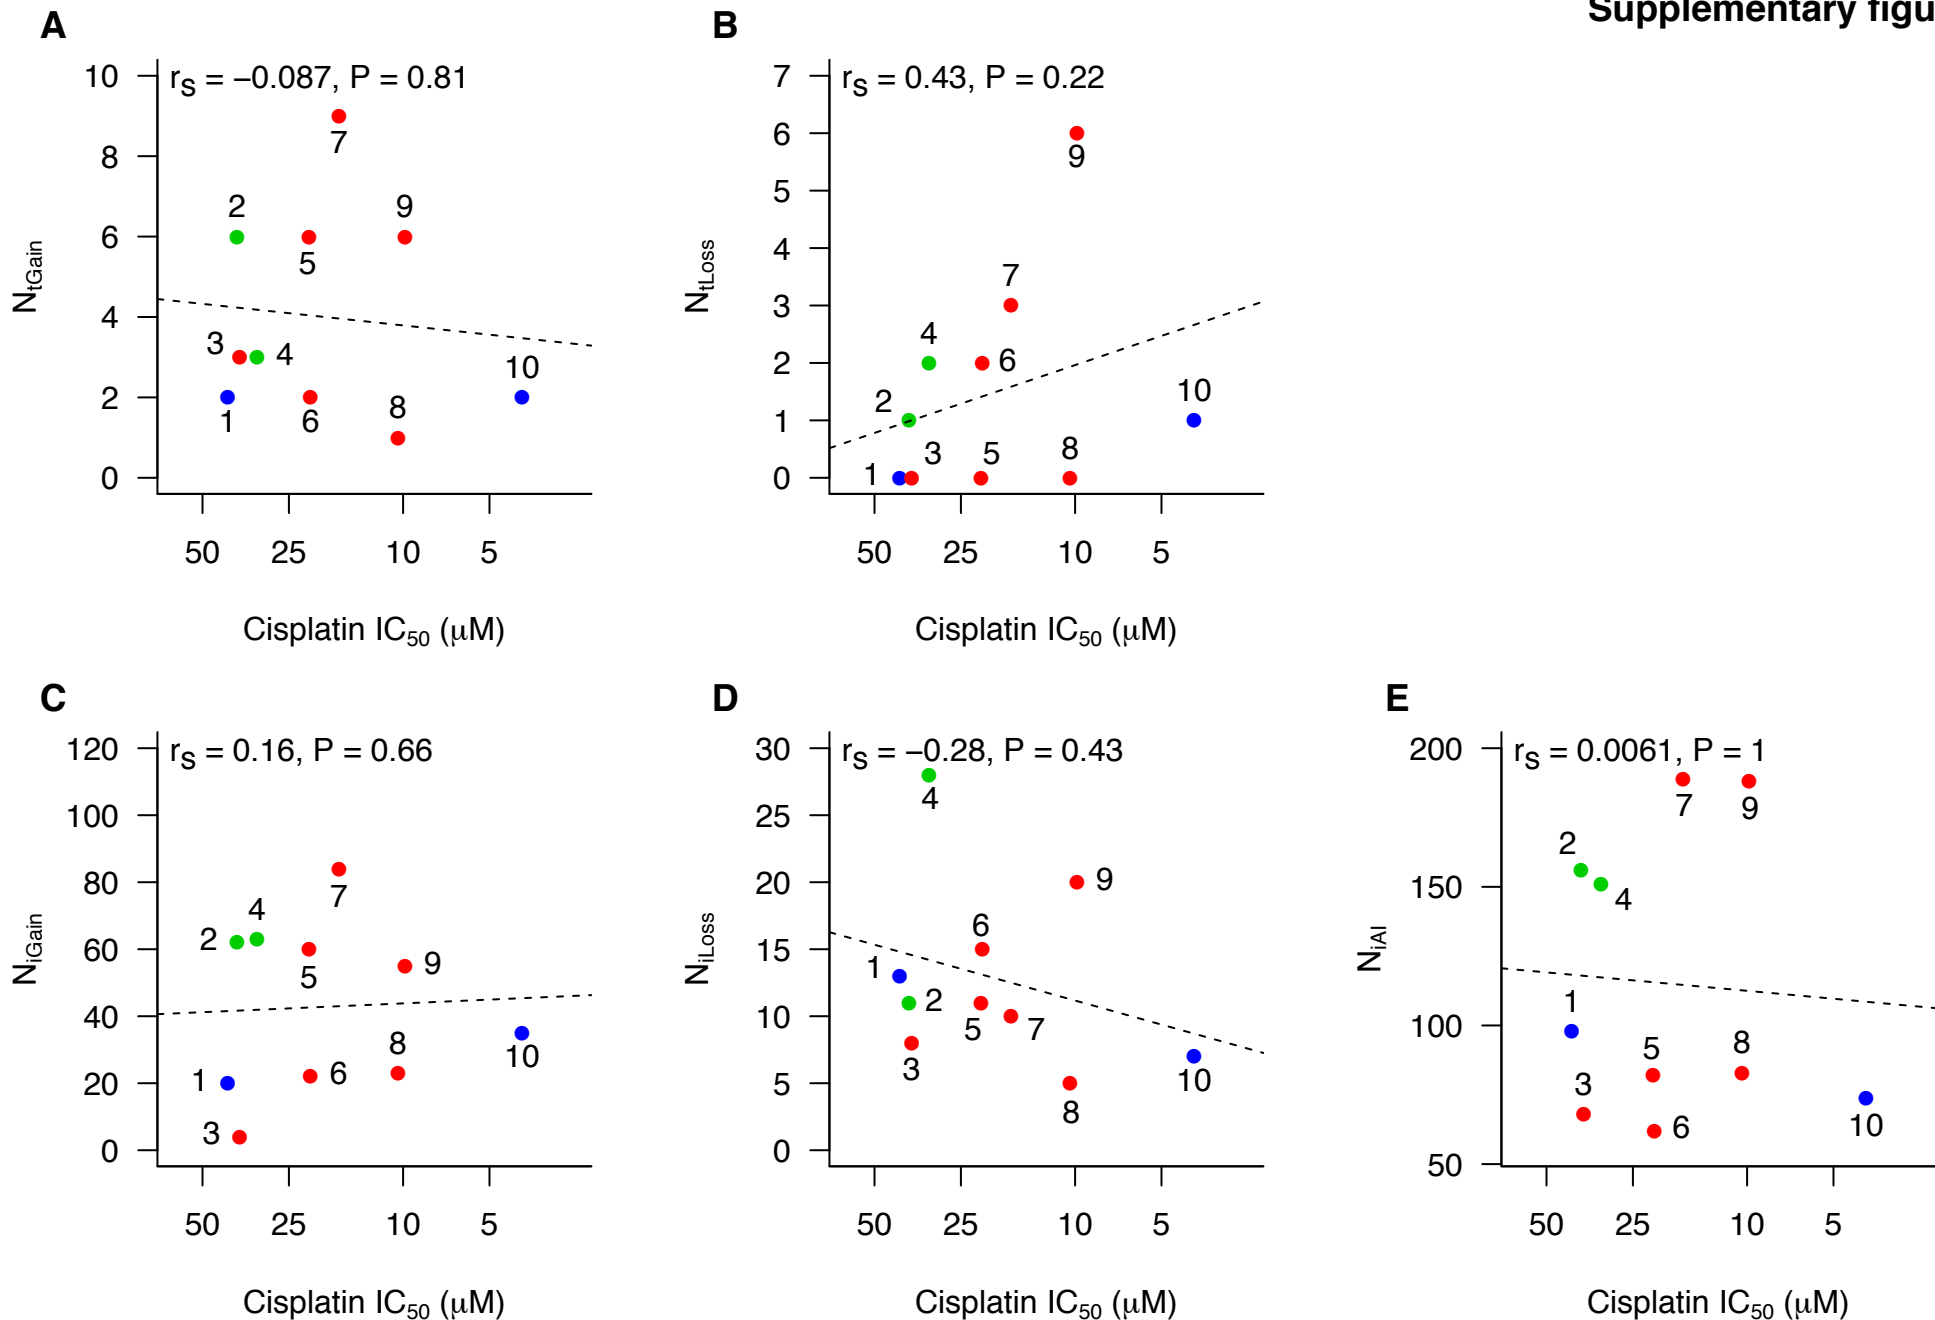

## Supplementary figure 4

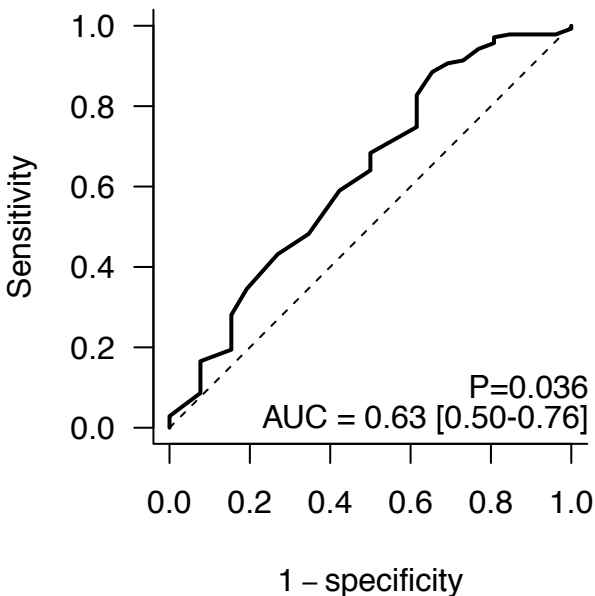

**Figure S4. Receiver operating characteristic curve showing the ability of NtAI to predict for sensitivity to platinum-based therapy in wtBRCA serous ovarian cancer.**

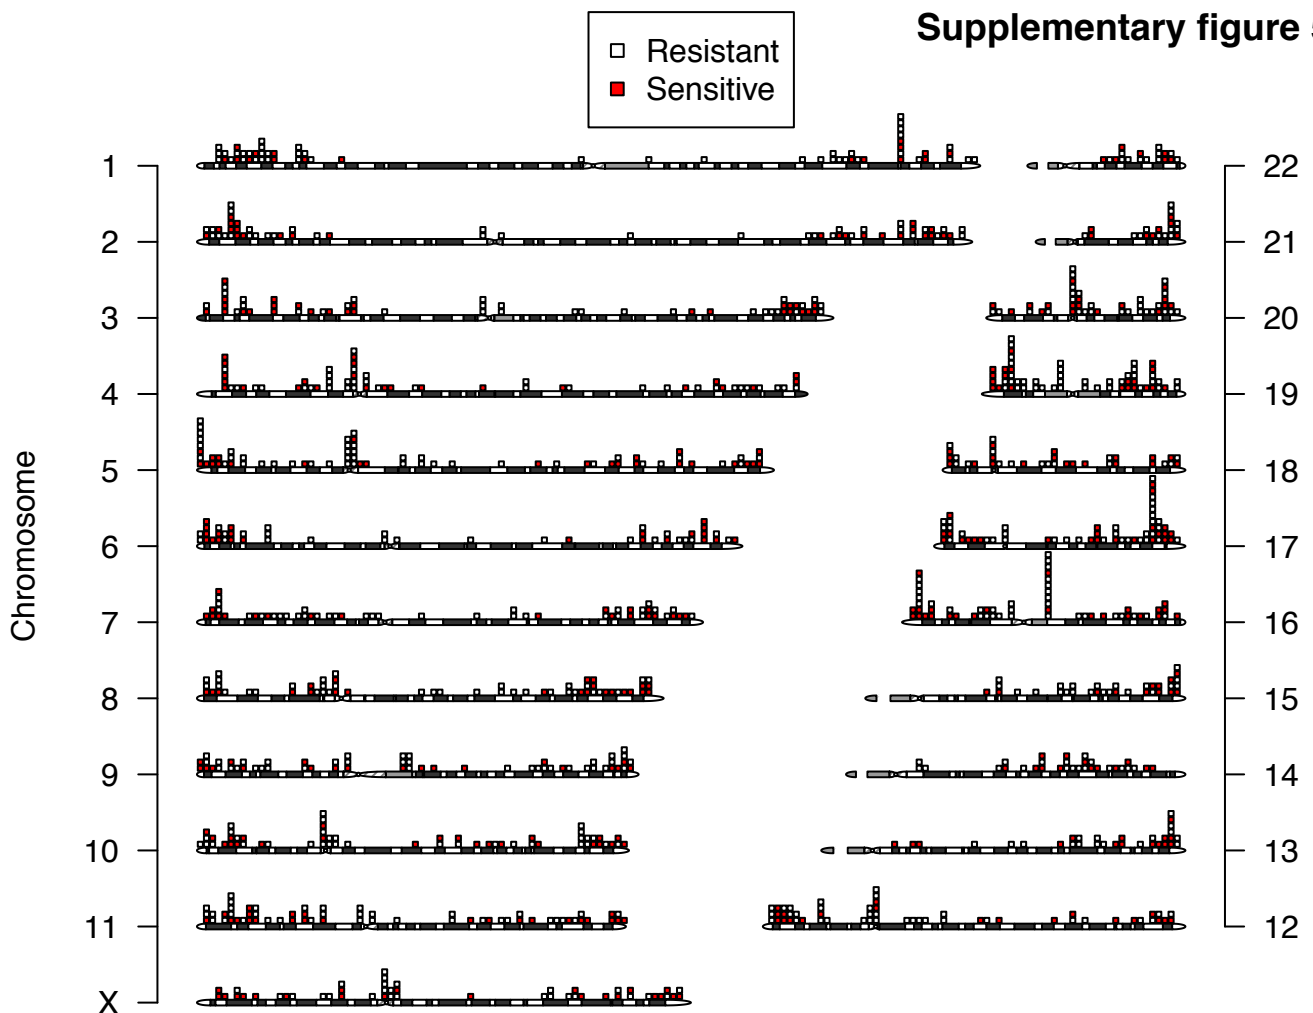

**Figure S5. Distribution of dsDNA breaks resulting in telomeric allelic imbalance and association with common CNVs according to cisplatin response**

Squares indicate inferred chromosomal location of dsDNA breaks resulting in tAI, pooled from both trials. Stacked squares represent multiple tumors with dsDNA breaks at the same position.

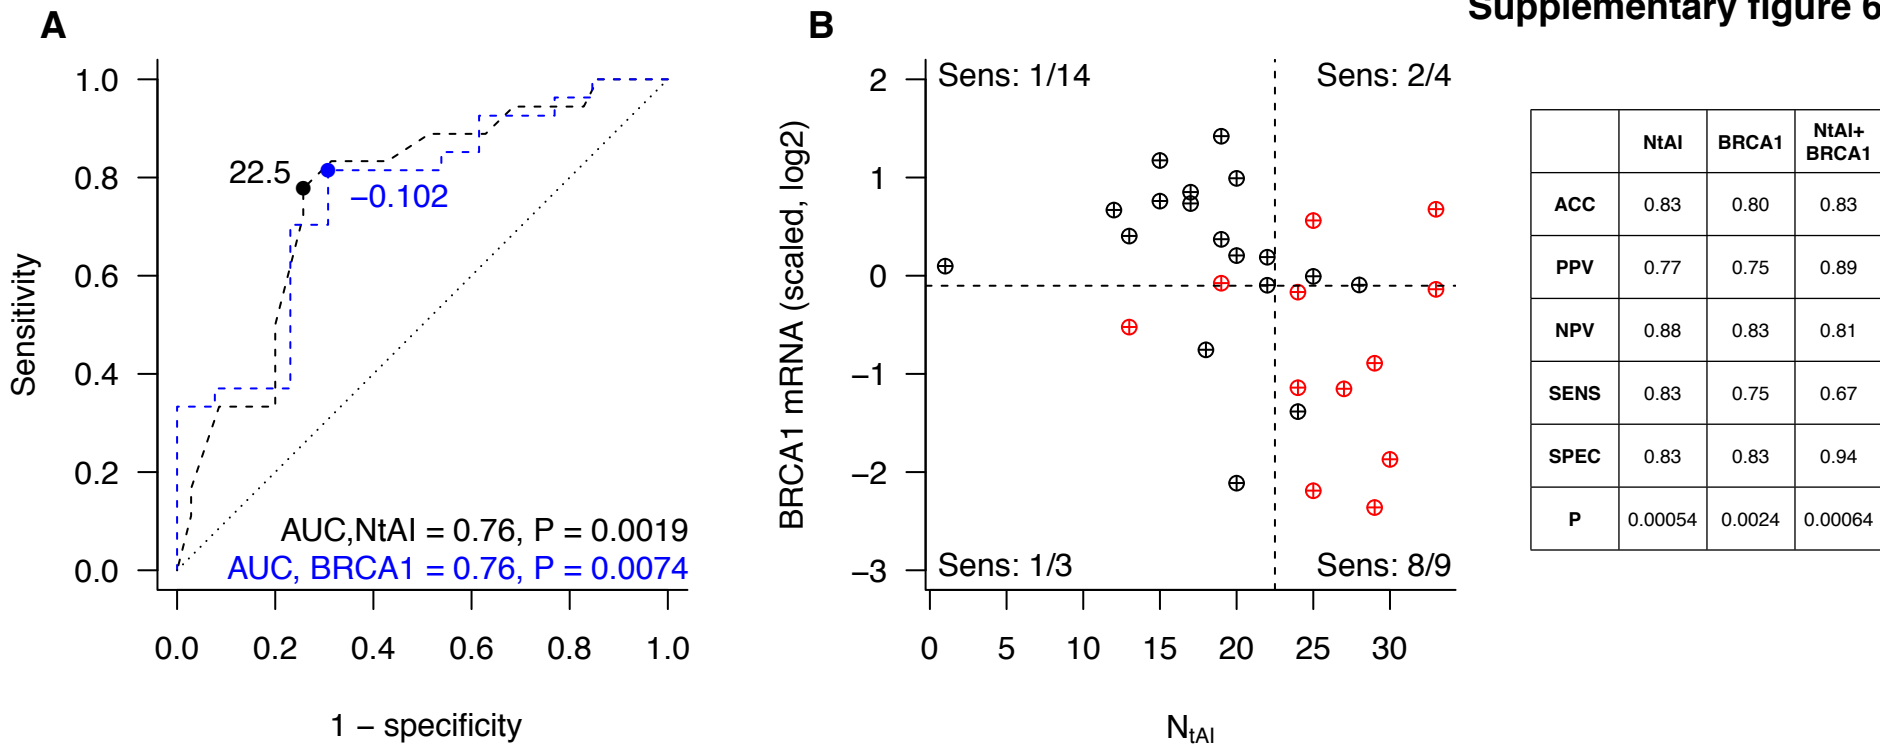

**Figure S6. BRCA1 expression and  $N_{tAI}$  versus response to cisplatin in Cisplatin-1 and Cisplatin-2 combined.**

**A.** Identification of the optimum cut-off for  $N_{tAI}$  (black) and BRCA1 mRNA (blue) to predict cisplatin response separately. Filled circles represent optimum cut-points. **B.** This panel shows how the combination of BRCA1 expression and  $N_{tAI}$  may improve prediction of cisplatin response. Red indicates samples sensitive to cisplatin. Lines represent the optimum cut-off for prediction of response based on  $N_{tAI}$  and BRCA1 mRNA, as determined in panel A. “Sens” represents the number of sensitive per total cases shown in each quadrant defined by the  $N_{tAI}$  and BRCA1 mRNA cut-offs. The table shows the prediction accuracy based on the defined cut-offs for  $N_{tAI}$  alone, BRCA1 mRNA alone, and the two measurements combined. ACC: accuracy. PPV: positive predictive value. NPV: negative predictive value. SENS: sensitivity. SPEC: specificity. P: p-value based on Fisher’s exact test. This table is based only on the samples shown in panel B.

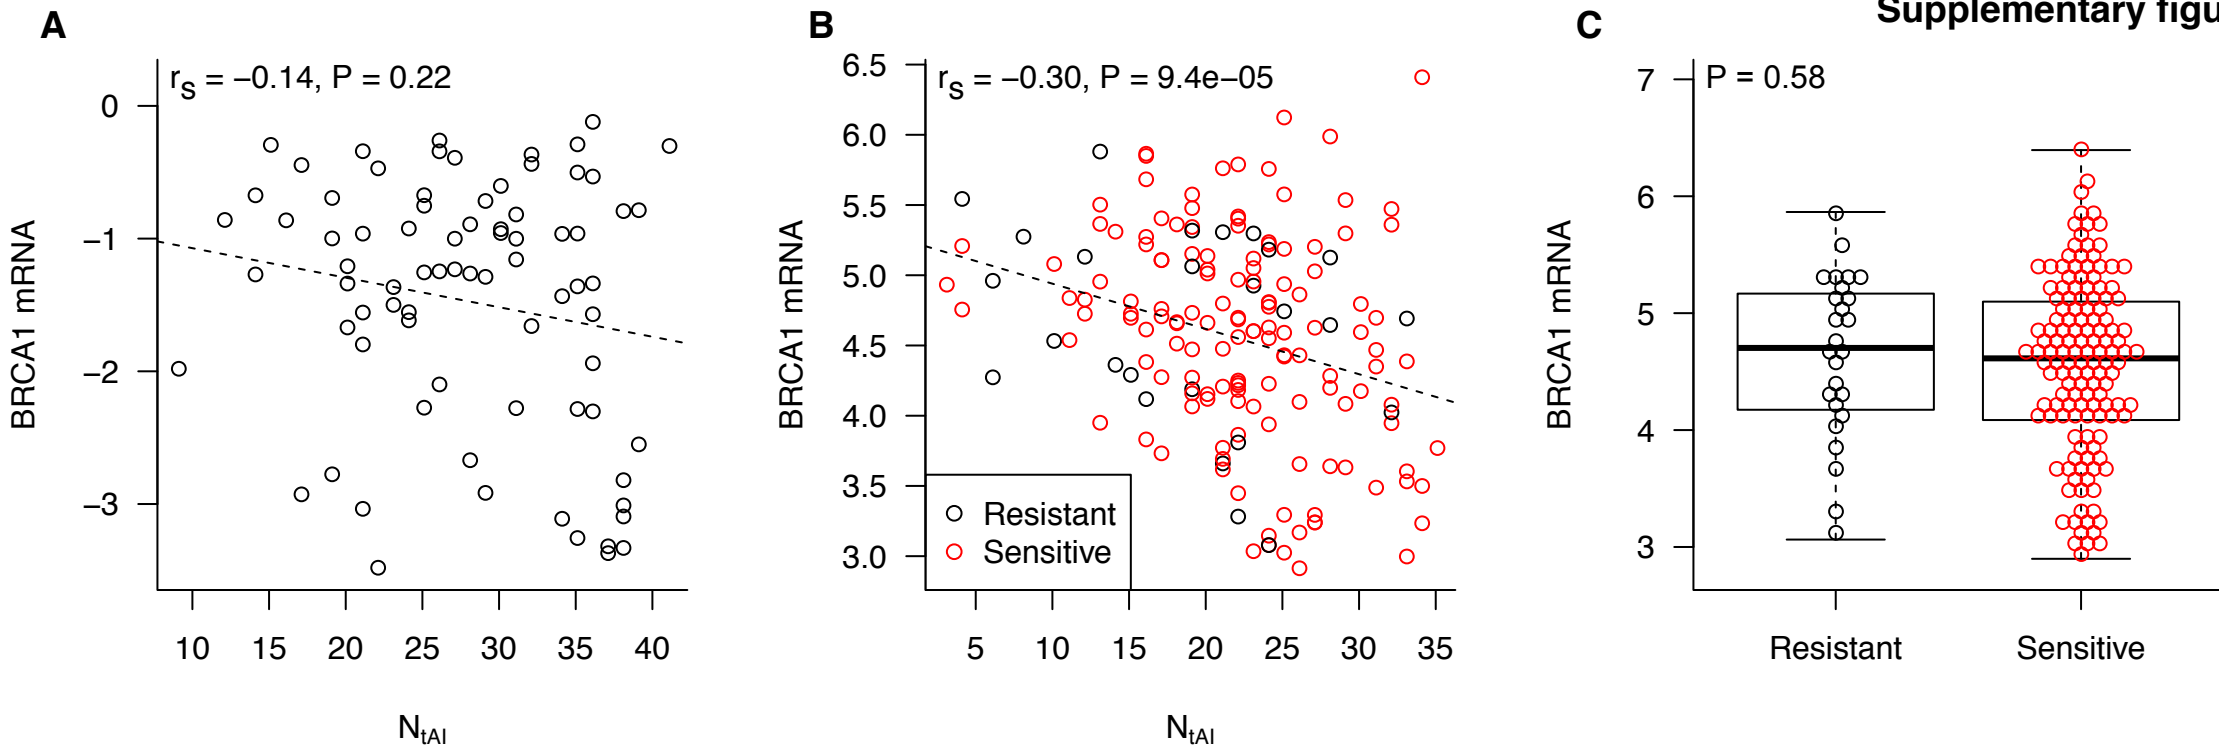

**Figure S7. BRCA1 expression by gene expression micro array in TCGA cohorts.**

**A.** BRCA1 mRNA expression versus  $N_{tAI}$  in the TCGA ER-/HER2- breast cancers ( $n=78$ ). **B.** BRCA1 mRNA expression versus  $N_{tAI}$  in the TCGA wtBRCA serous ovarian cancers ( $n=165$ ). **C.** BRCA1 mRNA expression versus treatment response in the TCGA wtBRCA serous ovarian cancers.
