# Supplementary material
Source: PubMed Central journal article supplement (PMC3806629)
Supplement: NIHMS513878-supplement-2.pdf [file NIHMS513878-supplement-2.pdf]

Telomeric allelic imbalance reflects DNA repair defects and  
sensitivity to DNA damaging agents in cancer  
Supplementary Methods - Data Analysis

Birkbak et al

February 6, 2012

This document describes the data analysis performed on all data.

The analysis was performed in the R statistical environment, and loads several objects containing pre-processed data. All these objects can be re-created from the data published with this manuscript, but can also be obtained from the authors on request.

All figures in this document is presented in their raw unpolished form, which occasionally means that the labeling may differ a bit from what is presented in the main manuscript, and be located at odd locations.

# Contents

|          |                                                             |            |
|----------|-------------------------------------------------------------|------------|
| <b>1</b> | <b>Getting started</b>                                      | <b>3</b>   |
| 1.1      | Required Packages . . . . .                                 | 3          |
| 1.2      | A few functions . . . . .                                   | 3          |
| <b>2</b> | <b>Load and organize data</b>                               | <b>11</b>  |
| 2.1      | Load cell line data . . . . .                               | 11         |
| 2.2      | Load the Heiser et al cell line data . . . . .              | 17         |
| 2.3      | Load the Cisplatin-1 trial data . . . . .                   | 25         |
| 2.4      | Load the Cisplatin-2 trial data . . . . .                   | 31         |
| 2.5      | Load TCGA ovarian data . . . . .                            | 39         |
| 2.6      | Load TCGA breast data . . . . .                             | 42         |
| <b>3</b> | <b>Cell lines</b>                                           | <b>44</b>  |
| 3.1      | Figure 1 . . . . .                                          | 44         |
| 3.2      | Supplementary figure 2 . . . . .                            | 50         |
| 3.3      | Supplementary figure 3 . . . . .                            | 54         |
| <b>4</b> | <b>Cisplatin clinical trials</b>                            | <b>61</b>  |
| 4.1      | Contamination . . . . .                                     | 61         |
| 4.2      | Figure 2, Cisplatin-1 . . . . .                             | 64         |
| 4.3      | Figure 2, Cisplatin-2 . . . . .                             | 68         |
| <b>5</b> | <b>TCGA ovarian</b>                                         | <b>72</b>  |
| 5.1      | Figure 3 . . . . .                                          | 72         |
| 5.2      | Supplementary figure 4 . . . . .                            | 73         |
| <b>6</b> | <b>NtAI breakpoints</b>                                     | <b>76</b>  |
| 6.1      | NtAI breakpoint location . . . . .                          | 76         |
| 6.2      | Supplementary figure 5 . . . . .                            | 77         |
| 6.3      | NtAI breakpoints associated with CNVs . . . . .             | 79         |
| 6.4      | Figure 4 . . . . .                                          | 82         |
| <b>7</b> | <b>BRCA1 expression versus NtAI</b>                         | <b>84</b>  |
| 7.1      | BRCA1 in Cisplatin-1 and Cisplatin-2, by qPCR . . . . .     | 84         |
| 7.2      | Figure 5 . . . . .                                          | 88         |
| 7.3      | Supplementary figure 6 . . . . .                            | 93         |
| 7.4      | BRCA1 expression in TCGA TNBC and Ovarian cohorts . . . . . | 97         |
| 7.5      | Supplementary figure 7 . . . . .                            | 97         |
| <b>8</b> | <b>Optimize for platform-specific probe numbers</b>         | <b>101</b> |
| <b>9</b> | <b>Session info</b>                                         | <b>104</b> |

# 1 Getting started

## 1.1 Required Packages

```
> library(affy)
> library(squash)
> library(genefilter)
> library(beeswarm)
> library(gplots)
> library(gdata)
> library(ROC)
> library(DNAcopy)
> library(quantsmooth)
> library(cluster)
> library(jetset)
> library(boot)
```

## 1.2 A few functions

This function puts a label on the top left corner of a figure

```
> label.panel <- function(txt, xoff = 1, yoff = 2, cex = 1.2) {
+   x <- grconvertX(0, from = "nfc") + (xoff * strwidth("m"))
+   y <- grconvertY(1, from = "nfc") - (yoff * strheight("A"))
+   text(x, y, labels = txt, font = 2, xpd = TRUE, cex = cex)
+ }
```

This function re-organizes the output from running the ASCAT algorithm into a more compact format similar to the output from other segmentation algorithms such as Circular Binary Segmentation

```
> organize.ascat.segments <- function(ascat.output, markers) {
+   samp.names <- colnames(ascat.output$nA)
+   failed.names <- ascat.output$failedarrays
+   if (length(failed.names) >= 1) {
+     failed.locations <- which(is.na(ascat.output$segments))
+     new.samp.names <- 1:length(ascat.output$segments)
+     new.samp.names[-c(failed.locations)] <- samp.names
+     new.samp.names[failed.locations] <- failed.names
+     samp.names <- new.samp.names
+   }
+   out.seg <- matrix(0, 0, ncol = 7)
+   colnames(out.seg) <- c("SampleID", "Chr", "Start", "End",
+     "nProbes", "nA", "nB")
+   if (length(ascat.output$segments) != length(samp.names)) {
+     stop
+   }
+   for (i in 1:length(ascat.output$segments)) {
+     sample.segs <- ascat.output$segments[[i]]
+     if (class(sample.segs) != "matrix") {
+       next
+     }
+     if (class(sample.segs) == "matrix") {
+       for (j in 1:nrow(sample.segs)) {
+         tmp <- markers[sample.segs[j, 1]:sample.segs[j,
```

```

+         2], ]
+         if (!all(tmp[, 1] == tmp[1, 1])) {
+           stop("Error in segmentation")
+         }
+         chr <- as.character(tmp[1, 1])
+         seg.start <- as.character(tmp[1, 2])
+         seg.end <- as.character(tmp[nrow(tmp), 2])
+         nProbes <- nrow(tmp)
+         out.seg <- rbind(out.seg, c(samp.names[i], chr,
+           seg.start, seg.end, nProbes, sample.segs[j,
+             3:4]))
+       }
+     gc()
+   }
+ }
+ out.seg[out.seg[, 2] == "X", 2] <- 23
+ out.seg <- as.data.frame(out.seg)
+ out.seg[, 2:7] <- apply(out.seg[, 2:7], 2, function(x) {
+   as.numeric(as.character(x))
+ })
+ out.seg[, 1] <- as.character(out.seg[, 1])
+ return(out.seg)
+ }

```

This function defines and summarizes the regions of telomeric allelic imbalance

```

> no.tel <- function(seg.out, chrominfo, min.size = 0, min.probes = 1,
+   max.size = 1e+09, cnv.check = "no", cnv.seg = NULL, cnv.gain = NULL) {
+   if (class(seg.out) == "DNAcopy") {
+     seg.out <- seg.out$output
+   }
+   tmp.segs <- seg.out[!seg.out[, 2] %in% c("MT", "Y", "24"),
+     ]
+   tmp.segs <- tmp.segs[!tmp.segs[, 5] < min.probes, ]
+   tmp.segs[, 2] <- as.character(tmp.segs[, 2])
+   if (nrow(tmp.segs[tmp.segs[, 2] == "X", ]) > 0) {
+     tmp.segs[tmp.segs[, 2] == "X", 2] <- rep(23, nrow(tmp.segs[tmp.segs[,
+       2] == "X", ]))
+   }
+   if (cnv.check != "no") {
+     if (class(cnv.seg) == "DNAcopy") {
+       cnv.seg <- cnv.seg$output
+     }
+     tmp.cnv <- cnv.seg[!cnv.seg[, 2] %in% c("MT", "Y", "24"),
+       ]
+     tmp.cnv <- tmp.cnv[!tmp.cnv[, 5] < min.probes, ]
+     tmp.cnv[, 2] <- as.character(tmp.cnv[, 2])
+     if (nrow(tmp.cnv[tmp.cnv[, 2] == "X", ]) > 0) {
+       tmp.cnv[tmp.cnv[, 2] == "X", 2] <- rep(23, nrow(tmp.cnv[tmp.cnv[,
+         2] == "X", ]))
+     }
+   }
+   tmp.segs[tmp.segs[, 6] == 1, 6] <- 2
+   for (j in 1:length(unique(tmp.segs[, 1]))) {

```

```

+     tmp.sample <- tmp.segs[tmp.segs[, 1] == unique(tmp.segs[,
+       1])[j], ]
+   for (i in 1:23) {
+     tmp1 <- tmp.sample[tmp.sample[, 2] == i, , drop = F]
+     if (tmp1[1, 6] == 2 & nrow(tmp1) != 1 & tmp1[1, 4] <
+       (chrominfo[i, 3] * 1000)) {
+       tmp.sample[tmp.sample[, 2] == i, 6][1] <- 1
+       if (cnv.check != "no") {
+         if (cnv.seg[cnv.seg[, 1] == unique(tmp.segs[,
+           1])[j] & cnv.seg[, 2] == i, ][1, 6] > cnv.gain) {
+           tmp.sample[tmp.sample[, 2] == i, 6][1] <- 0
+         }
+       }
+     }
+     if (tmp1[nrow(tmp1), 6] == 2 & nrow(tmp1) != 1 &
+       tmp1[nrow(tmp1), 3] > (chrominfo[i, 3] * 1000)) {
+       tmp.sample[tmp.sample[, 2] == i, 6][nrow(tmp.sample[tmp.sample[,
+         2] == i, ])] <- 1
+       if (cnv.check != "no") {
+         if (cnv.seg[cnv.seg[, 1] == unique(tmp.segs[,
+           1])[j] & cnv.seg[, 2] == i, ][nrow(cnv.seg[cnv.seg[,
+             1] == unique(tmp.segs[, 1])[j] & cnv.seg[,
+               2] == i, ]), 6] > cnv.gain) {
+           tmp.sample[tmp.sample[, 2] == i, 6][nrow(tmp.sample[tmp.sample[,
+             2] == i, ])] <- 0
+         }
+       }
+     }
+     if (nrow(tmp.sample[tmp.sample[, 2] == i, ]) == 1 &
+       tmp.sample[tmp.sample[, 2] == i, 6][1] != 0) {
+       tmp.sample[tmp.sample[, 2] == i, 6][1] <- 3
+     }
+   }
+   tmp.segs[tmp.segs[, 1] == unique(tmp.segs[, 1])[j], ] <- tmp.sample
+ }
+ no.events <- matrix(0, nrow = length(unique(tmp.segs[, 1])),
+   ncol = 28)
+ rownames(no.events) <- unique(tmp.segs[, 1])
+ colnames(no.events) <- c("Telomeric AI", "Mean size", "Interstitial AI",
+   "Mean Size", "Wholo chr AI", 1:23)
+ for (i in unique(tmp.segs[, 1])) {
+   tmp <- tmp.segs[tmp.segs[, 1] == i, ]
+   tmp <- tmp[(tmp[, 4] - tmp[, 3]) > min.size, ]
+   tmp <- tmp[(tmp[, 4] - tmp[, 3]) < max.size, ]
+   no.events[i, 1] <- nrow(tmp[tmp[, 6] == 1, ])
+   no.events[i, 2] <- mean(tmp[tmp[, 6] == 1, 4] - tmp[tmp[,
+     6] == 1, 3])
+   no.events[i, 3] <- nrow(tmp[tmp[, 6] == 2, ])
+   no.events[i, 4] <- mean(tmp[tmp[, 6] == 2, 4] - tmp[tmp[,
+     6] == 2, 3])
+   no.events[i, 5] <- nrow(tmp[tmp[, 6] == 3, ])
+   no.events[i, tmp[tmp[, 6] == 3, 2]] <- 1
+ }
+ return(no.events)

```

```
+ }
```

This function defines and summarizes the regions of telomeric copy number changes

```
> no.tel.cna <- function(seg.out, chrominfo, min.size = 0, min.probes = 1,
+   max.size = 1e+09, gain = log2(2.5/2), loss = log2(1.5/2)) {
+   if (class(seg.out) == "DNAcopy") {
+     seg.out <- seg.out$output
+   }
+   tmp.segs <- seg.out
+   tmp.segs <- tmp.segs[!tmp.segs[, 5] < min.probes, ]
+   tmp.segs[, 2] <- as.character(tmp.segs[, 2])
+   if (nrow(tmp.segs[tmp.segs[, 2] == "X", ]) > 0) {
+     tmp.segs[tmp.segs[, 2] == "X", 2] <- rep(23, nrow(tmp.segs[tmp.segs[,
+       2] == "X", ]))
+   }
+   seg.out <- seg.out[!seg.out[, 2] %in% c("MT", "Y", "24"),
+     ]
+   tmp.segs[tmp.segs[, 6] >= gain, 6] <- 10
+   tmp.segs[tmp.segs[, 6] <= loss, 6] <- -10
+   tmp.segs[tmp.segs[, 6] > loss & tmp.segs[, 6] < gain, 6] <- 0
+   for (j in 1:length(unique(tmp.segs[, 1]))) {
+     tmp.sample <- tmp.segs[tmp.segs[, 1] == unique(tmp.segs[,
+       1])[j], ]
+     for (i in 1:23) {
+       tmp1 <- tmp.sample[tmp.sample[, 2] == i, , drop = F]
+       if (tmp1[1, 6] == 10 & nrow(tmp1) != 1 & tmp1[1,
+         4] < (chrominfo[i, 3] * 1000)) {
+         tmp.sample[tmp.sample[, 2] == i, 6][1] <- 1
+       }
+       if (tmp1[nrow(tmp1), 6] == 10 & nrow(tmp1) != 1 &
+         tmp1[nrow(tmp1), 3] > (chrominfo[i, 3] * 1000)) {
+         tmp.sample[tmp.sample[, 2] == i, 6][nrow(tmp.sample[tmp.sample[,
+           2] == i, ])] <- 1
+       }
+       if (tmp1[1, 6] == -10 & nrow(tmp1) != 1 & tmp1[1,
+         4] < (chrominfo[i, 3] * 1000)) {
+         tmp.sample[tmp.sample[, 2] == i, 6][1] <- 2
+       }
+       if (tmp1[nrow(tmp1), 6] == -10 & nrow(tmp1) != 1 &
+         tmp1[nrow(tmp1), 3] > (chrominfo[i, 3] * 1000)) {
+         tmp.sample[tmp.sample[, 2] == i, 6][nrow(tmp.sample[tmp.sample[,
+           2] == i, ])] <- 2
+       }
+       if (nrow(tmp.sample[tmp.sample[, 2] == i, ]) == 10 &
+         tmp.sample[tmp.sample[, 2] == i, 6][1] != 0) {
+         tmp.sample[tmp.sample[, 2] == i, 6][1] <- 3
+       }
+       if (nrow(tmp.sample[tmp.sample[, 2] == i, ]) == -10 &
+         tmp.sample[tmp.sample[, 2] == i, 6][1] != 0) {
+         tmp.sample[tmp.sample[, 2] == i, 6][1] <- 4
+       }
+     }
+   }
+   tmp.segs[tmp.segs[, 1] == unique(tmp.segs[, 1])[j], ] <- tmp.sample
```

```

+   }
+   no.events <- matrix(0, nrow = length(unique(tmp.segs[, 1])),
+     ncol = 9)
+   rownames(no.events) <- unique(tmp.segs[, 1])
+   colnames(no.events) <- c("Total telomeric CNA", "Mean size",
+     "Telomeric gain", "Mean size", "Telomeric loss", "Mean size",
+     "Total whole chromosome CNA", "Whole chromosome gain",
+     "Whole chromosome loss")
+   for (i in unique(tmp.segs[, 1])) {
+     tmp <- tmp.segs[tmp.segs[, 1] == i, ]
+     tmp <- tmp[(tmp[, 4] - tmp[, 3]) > min.size, ]
+     tmp <- tmp[(tmp[, 4] - tmp[, 3]) < max.size, ]
+     no.events[i, 1] <- nrow(tmp[tmp[, 6] == 1 | tmp[, 6] ==
+       2, ])
+     no.events[i, 2] <- mean(tmp[tmp[, 6] == 1 | tmp[, 6] ==
+       2, 4] - tmp[tmp[, 6] == 1 | tmp[, 6] == 2, 3])
+     no.events[i, 3] <- nrow(tmp[tmp[, 6] == 1, ])
+     no.events[i, 4] <- mean(tmp[tmp[, 6] == 1, 4] - tmp[tmp[,
+       6] == 1, 3])
+     no.events[i, 5] <- nrow(tmp[tmp[, 6] == 2, ])
+     no.events[i, 6] <- mean(tmp[tmp[, 6] == 2, 4] - tmp[tmp[,
+       6] == 2, 3])
+     no.events[i, 7] <- nrow(tmp[tmp[, 6] == 3 | tmp[, 6] ==
+       4, ])
+     no.events[i, 8] <- nrow(tmp[tmp[, 6] == 3, ])
+     no.events[i, 9] <- nrow(tmp[tmp[, 6] == 4, ])
+   }
+   return(no.events)
+ }

```

This function counts the total number of copy number aberrations

```

> gaps <- function(cbs.out, min.size = 0, gain = log2(2.5/2), loss = log2(1.5/2),
+   min.probes = 1) {
+   if (length(gain) == 1) {
+     gain <- rep(gain, length(unique(cbs.out[, 1])))
+   }
+   if (length(loss) == 1) {
+     loss <- rep(loss, length(unique(cbs.out[, 1])))
+   }
+   stopifnot(length(gain) == length(unique(cbs.out[, 1])))
+   stopifnot(length(loss) == length(unique(cbs.out[, 1])))
+   cbs.out <- cbs.out[!(cbs.out[, 2] == 24), ]
+   cbs.out <- cbs.out[!(cbs.out[, 5] <= min.probes), ]
+   gaps <- matrix(rep(NA, length(unique(cbs.out[, 1]))), nrow = length(unique(cbs.out[,
+     1])), ncol = 7)
+   rownames(gaps) <- unique(cbs.out[, 1])
+   colnames(gaps) <- c("Short Aberrations", "Long Aberrations",
+     "Short gains", "Short deletions", "Total Gains", "Total Deletions",
+     "Total Aberrations")
+   for (i in 1:nrow(gaps)) {
+     a <- cbs.out[cbs.out[, 1] == rownames(gaps)[i], ]
+     a <- a[a[, 6] >= gain[i] | a[, 6] <= loss[i], ]
+     gaps[i, 1] <- nrow(a[a[, 4] - a[, 3] <= min.size, ])
+   }
+ }

```

```

+     gaps[i, 2] <- nrow(a[a[, 4] - a[, 3] > min.size, ])
+     gaps[i, 5] <- nrow(a[a[, 6] > gain[i], ])
+     gaps[i, 6] <- nrow(a[a[, 6] < loss[i], ])
+     b <- a[a[, 4] - a[, 3] <= min.size, ]
+     gaps[i, 3] <- nrow(b[b[, 6] > gain[i], ])
+     gaps[i, 4] <- nrow(b[b[, 6] < loss[i], ])
+   }
+   gaps[, 7] <- gaps[, 5] + gaps[, 6]
+   return(gaps)
+ }

```

This function identifies all telomeric AI and returns the location

```

> telAI.fn <- function(seg.out, chrominfo, output = "tel", min.size = 0,
+   min.probes = 1, max.size = 1e+09) {
+   if (class(seg.out) == "DNACopy") {
+     seg.out <- seg.out$output
+   }
+   tmp.segs <- seg.out[!seg.out[, 2] %in% c("MT", "Y", "24"),
+   ]
+   tmp.segs <- tmp.segs[!tmp.segs[, 5] < min.probes, ]
+   tmp.segs[, 2] <- as.character(tmp.segs[, 2])
+   if (nrow(tmp.segs[tmp.segs[, 2] == "X", ]) > 0) {
+     tmp.segs[tmp.segs[, 2] == "X", 2] <- rep(23, nrow(tmp.segs[tmp.segs[,
+     2] == "X", ]))
+   }
+   tmp.segs[tmp.segs[, 6] == 1, 6] <- 2
+   tmp.segs <- tmp.segs[tmp.segs[, 4] - tmp.segs[, 3] >= min.size,
+   ]
+   for (j in 1:length(unique(tmp.segs[, 1]))) {
+     tmp.sample <- tmp.segs[tmp.segs[, 1] == unique(tmp.segs[,
+     1])[j], ]
+     for (i in 1:23) {
+       tmp1 <- tmp.sample[tmp.sample[, 2] == i, , drop = F]
+       if (tmp1[1, 6] == 2 & nrow(tmp1) != 1 & tmp1[1, 4] <
+       (chrominfo[i, 3] * 1000)) {
+         tmp.sample[tmp.sample[, 2] == i, 6][1] <- 1
+       }
+       if (tmp1[nrow(tmp1), 6] == 2 & nrow(tmp1) != 1 &
+       tmp1[nrow(tmp1), 3] > (chrominfo[i, 3] * 1000)) {
+         tmp.sample[tmp.sample[, 2] == i, 6][nrow(tmp.sample[tmp.sample[,
+         2] == i, ])] <- 1
+       }
+       if (nrow(tmp.sample[tmp.sample[, 2] == i, ]) == 1 &
+       tmp.sample[tmp.sample[, 2] == i, 6][1] != 0) {
+         tmp.sample[tmp.sample[, 2] == i, 6][1] <- 3
+       }
+     }
+     tmp.segs[tmp.segs[, 1] == unique(tmp.segs[, 1])[j], ] <- tmp.sample
+   }
+   if (output == "tel") {
+     tmp.segs <- tmp.segs[tmp.segs[, 6] == 1, ]
+   }
+   if (output == "int") {

```



```

+     tmp.segs <- tmp.segs[tmp.segs[, 6] == 2, ]
+   }
+   return(tmp.segs)
+ }

```

This function takes as input breakpoint location of telomeric AI, and then test each breakpoint for association with a given DNA structure, supplied as a two-column matrix of locations

```

> telBreak.CNV.fn <- function(test.breaks, test.loc, window.size = 25000) {
+   break.loc <- matrix(0, 0, 2)
+   for (i in 1:nrow(test.breaks)) {
+     break.loc <- rbind(break.loc, c(as.numeric(test.breaks[i,
+       2]), NA))
+     if (as.numeric(test.breaks[i, 3]) < chrominfo[as.numeric(test.breaks[i,
+       2]), 3] * 1000) {
+       break.loc[i, 2] <- as.numeric(test.breaks[i, 4])
+     }
+     if (as.numeric(test.breaks[i, 3]) > chrominfo[as.numeric(test.breaks[i,
+       2]), 3] * 1000) {
+       break.loc[i, 2] <- as.numeric(test.breaks[i, 3])
+     }
+   }
+   test.breaksDNA <- vector()
+   for (i in 1:nrow(break.loc)) {
+     tmp <- test.loc[test.loc[, 1] == break.loc[i, 1], ]
+     a <- c(break.loc[i, 2] - window.size, break.loc[i, 2] +
+       window.size)
+     tmp <- tmp[tmp[, 3] >= a[1], , drop = F]
+     tmp <- tmp[tmp[, 2] <= a[2], , drop = F]
+     test.breaksDNA[i] <- nrow(tmp)
+   }
+   tmp <- c(length(test.breaksDNA[test.breaksDNA > 0]), length(test.breaksDNA))
+   names(tmp) <- c("Associated with", "Total")
+   return(tmp)
+ }

```

This functions calculate sensitivity, specificity, positive predictive value, negative predictive value, accuracy, and a p-value, based on predicted versus true input

```

> acc.calc <- function(test, truth) {
+   if (class(test) == "logical") {
+     test <- c(0, 1)[match(test, c("FALSE", "TRUE"))]
+   }
+   if (class(truth) == "logical") {
+     truth <- c(0, 1)[match(truth, c("FALSE", "TRUE"))]
+   }
+   TN <- length(test[test == 0 & truth == 0])
+   TP <- length(test[test == 1 & truth == 1])
+   FN <- length(test[test == 0 & truth == 1])
+   FP <- length(test[test == 1 & truth == 0])
+   c(ACC = (TP + TN)/(TP + FP + FN + TN), PPV = TP/(TP + FP),
+     NPV = TN/(TN + FN), SENS = TP/(TP + FN), SPEC = TN/(TN +
+     FP), P = fisher.test(table(test, truth))$p.value)
+ }

```

This is a convenience function that simply takes two vectors as input, and add one as names for the other

```
> name.vect <- function(x, y) {  
+   names(x) <- y  
+   return(x)  
+ }
```

These two functions are used to calculate confidence intervals for AUC curves by bootstrapping 1000 times

```
> AUC.stat <- function(data, indices) {  
+   d <- data[indices, ]  
+   return(AUC(rocdemo.sca(d[, 1], d[, 2])))  
+ }  
> ci.auc <- function(data, pcr, subset = TRUE) {  
+   data <- data[subset]  
+   pcr <- pcr[subset]  
+   results <- vector()  
+   d <- cbind(pcr, data)  
+   tmp <- boot(data = d, statistic = AUC.stat, R = 1000)  
+   tmp <- boot.ci(tmp, type = "bca")  
+   results[1] <- tmp$bca[4]  
+   results[2] <- tmp$bca[5]  
+   names(results) <- c("Low", "High")  
+   return(results)  
+ }
```

## 2 Load and organize data

Load a few necessary objects

The first is an object that holds information about chromosome size and location of the centromere. It can be reconstructed by loading a 23x3 matrix with chromosome number in the first column, chromosome length in the second, and centromere location in the third.

```
> load("chrominfo.RData")
> head(chrominfo)

  chrom  length centromere
1     1 245522.8 122267.48
2     2 243018.2  93248.04
3     3 199505.7  92037.54
4     4 191411.2  51001.04
5     5 180857.9  47941.40
6     6 170975.7  60438.12
```

### 2.1 Load cell line data

This is an object with segmented copy numbers of the cell lines, based on SNP6 data obtained from the Sanger center.

Copy number was determined based on data pre-processed using the `aroma.affymetrix` CRMAv2 and CalMaTe algorithms, segmentation was performed using the R package `DNAcopy`. The object can be reconstructed by downloading the cell line data from the Wellcome Trust fund, preprocessing via the `aroma` packages, and segmenting the output using the R package `DNAcopy`, with default parameters.

```
> load("cellLines.CN.seg.aroma.20111220-1.RData")
> head(cellLines.CN.seg)

  ID chrom loc.start loc.end num.mark seg.mean
1 BT-20   1     51599   88466     18 -0.7428
2 BT-20   1    218570  346406     12  0.3422
3 BT-20   1   394035 16799099    9024 -0.0542
4 BT-20   1 16803917 16878322     38  0.2721
5 BT-20   1 16878364 16888847     17 -0.3034
6 BT-20   1 16889460 16984147     42  0.2651
```

This is the output from the ASCAT v2 algorithm (<http://heim.ifi.uio.no/bioinf/Projects/ASCAT/>), based on the log<sub>2</sub> ratios and B-allele frequencies. To reconstruct this object, retrieve the cell line Affymetrix SNP6 data from Sanger, and calculate and extract the log<sub>2</sub> ratios and BAF. We used the `aroma.affymetrix` and `calmate` packages for pre-processing, available at [www.aroma-project.org](http://www.aroma-project.org).

```
> load("cellLines.ascat.output.RData")
> str(cellLines.ascat.output)
```

List of 7

```
$ nA          : num [1:1868855, 1:18] 2 2 2 2 2 2 2 2 2 2 ...
..- attr(*, "dimnames")=List of 2
.. ..$ : chr [1:1868855] "CN_473963" "CN_473964" "CN_473965" "CN_477984" ...
.. ..$ : chr [1:18] "BT-20_4218" "BT-549_3943" "CAMA-1_3659" "HCC1143-BL_4099" ...
$ nB          : num [1:1868855, 1:18] 0 0 0 0 0 0 0 0 0 0 ...
..- attr(*, "dimnames")=List of 2
```

```

.. ..$ : chr [1:1868855] "CN_473963" "CN_473964" "CN_473965" "CN_477984" ...
.. ..$ : chr [1:18] "BT-20_4218" "BT-549_3943" "CAMA-1_3659" "HCC1143-BL_4099" ...
$ aberrantcellfraction: num [1:18] 0.75 0.73 0.64 0.22 0.7 1 0.74 0.6 0.87 0.57 ...
$ ploidy : num [1:18] 2.98 4.1 3.75 4.61 4.4 ...
$ psi : num [1:18] 2.9 4.2 3.95 4.25 3.9 1.95 2.35 2.15 2.1 2.3 ...
$ failedarrays : chr [1:3] "BT-474_3712" "HCC38_3392" "MDA-MB-453_4502"
$ segments :List of 21
..$ : num [1:332, 1:4] 1 28883 30031 34322 36936 ...
.. ..- attr(*, "dimnames")=List of 2
.. .. ..$ : NULL
.. .. ..$ : chr [1:4] "start" "end" "nA" "nB"
..$ : logi NA
..$ : num [1:131, 1:4] 1 8871 12881 75901 118519 ...
.. ..- attr(*, "dimnames")=List of 2
.. .. ..$ : NULL
.. .. ..$ : chr [1:4] "start" "end" "nA" "nB"
..$ : num [1:197, 1:4] 1 17622 24427 51160 51503 ...
.. ..- attr(*, "dimnames")=List of 2
.. .. ..$ : NULL
.. .. ..$ : chr [1:4] "start" "end" "nA" "nB"
..$ : num [1:64, 1:4] 1 75901 107754 108890 146402 ...
.. ..- attr(*, "dimnames")=List of 2
.. .. ..$ : NULL
.. .. ..$ : chr [1:4] "start" "end" "nA" "nB"
..$ : num [1:311, 1:4] 1 3031 11311 13411 14708 ...
.. ..- attr(*, "dimnames")=List of 2
.. .. ..$ : NULL
.. .. ..$ : chr [1:4] "start" "end" "nA" "nB"
..$ : num [1:34, 1:4] 1 146402 300065 427831 449839 ...
.. ..- attr(*, "dimnames")=List of 2
.. .. ..$ : NULL
.. .. ..$ : chr [1:4] "start" "end" "nA" "nB"
..$ : num [1:206, 1:4] 1 5810 17701 17763 51728 ...
.. ..- attr(*, "dimnames")=List of 2
.. .. ..$ : NULL
.. .. ..$ : chr [1:4] "start" "end" "nA" "nB"
..$ : num [1:50, 1:4] 1 75901 78879 146402 184612 ...
.. ..- attr(*, "dimnames")=List of 2
.. .. ..$ : NULL
.. .. ..$ : chr [1:4] "start" "end" "nA" "nB"
..$ : num [1:44, 1:4] 1 44212 44260 146402 207847 ...
.. ..- attr(*, "dimnames")=List of 2
.. .. ..$ : NULL
.. .. ..$ : chr [1:4] "start" "end" "nA" "nB"
..$ : num [1:164, 1:4] 1 33510 36391 51728 75901 ...
.. ..- attr(*, "dimnames")=List of 2
.. .. ..$ : NULL
.. .. ..$ : chr [1:4] "start" "end" "nA" "nB"
..$ : num [1:64, 1:4] 1 75901 79304 106722 107097 ...
.. ..- attr(*, "dimnames")=List of 2
.. .. ..$ : NULL
.. .. ..$ : chr [1:4] "start" "end" "nA" "nB"
..$ : num [1:333, 1:4] 1 74020 74442 75901 77875 ...
.. ..- attr(*, "dimnames")=List of 2

```

```

.. .. ..$ : NULL
.. .. ..$ : chr [1:4] "start" "end" "nA" "nB"
..$ : num [1:51, 1:4] 1 14094 15710 78907 78949 ...
.. ..- attr(*, "dimnames")=List of 2
.. .. ..$ : NULL
.. .. ..$ : chr [1:4] "start" "end" "nA" "nB"
..$ : logi NA
..$ : num [1:391, 1:4] 1 66244 67087 67256 67849 ...
.. ..- attr(*, "dimnames")=List of 2
.. .. ..$ : NULL
.. .. ..$ : chr [1:4] "start" "end" "nA" "nB"
..$ : num [1:142, 1:4] 1 2658 3950 15934 18540 ...
.. ..- attr(*, "dimnames")=List of 2
.. .. ..$ : NULL
.. .. ..$ : chr [1:4] "start" "end" "nA" "nB"
..$ : num [1:374, 1:4] 1 5756 6012 28835 30179 ...
.. ..- attr(*, "dimnames")=List of 2
.. .. ..$ : NULL
.. .. ..$ : chr [1:4] "start" "end" "nA" "nB"
..$ : logi NA
..$ : num [1:172, 1:4] 1 712 913 6649 7117 ...
.. ..- attr(*, "dimnames")=List of 2
.. .. ..$ : NULL
.. .. ..$ : chr [1:4] "start" "end" "nA" "nB"
..$ : num [1:169, 1:4] 1 23222 23257 75901 79124 ...
.. ..- attr(*, "dimnames")=List of 2
.. .. ..$ : NULL
.. .. ..$ : chr [1:4] "start" "end" "nA" "nB"

```

### Load the probe locations

```

> load("snp6.markers.ascat.RData")
> head(snp6.markers.ascat)

```

|           | Chrom | Position |
|-----------|-------|----------|
| CN_473963 | 1     | 51599    |
| CN_473964 | 1     | 51672    |
| CN_473965 | 1     | 51687    |
| CN_477984 | 1     | 52016    |
| CN_473981 | 1     | 52784    |
| CN_473982 | 1     | 52801    |

### This is the cisplatin IC50 values

```

> load("ic50.CL.20111107.RData")
> ic50.CL

```

|         | Cisplatin IC50 | Subtype |
|---------|----------------|---------|
| BT-20   | 9.85           | TNBC    |
| BT-474  | 35.89          | HER2    |
| BT-549  | 21.01          | TNBC    |
| CAMA-1  | 40.82          | ER      |
| HCC1143 | 16.71          | TNBC    |
| HCC1187 | 21.25          | TNBC    |
| HCC1954 | 37.93          | HER2    |

|            |       |      |
|------------|-------|------|
| HCC38      | 12.02 | TNBC |
| MCF7       | 54.71 | ER   |
| MDA-MB-231 | 37.05 | TNBC |
| MDA-MB-361 | 32.31 | HER2 |
| MDA-MB-453 | 50.14 | TNBC |
| MDA-MB-468 | 10.40 | TNBC |
| T47D       | 3.85  | ER   |

Now organize the output from ASCAT, to get it into a more compact format

```
> cellLines.ascat.seg <- organize.ascat.segments(cellLines.ascat.output,
+       snp6.markers.ascat)
> head(cellLines.ascat.seg)
```

|   | SampleID   | Chr | Start    | End      | nProbes | nA | nB |
|---|------------|-----|----------|----------|---------|----|----|
| 1 | BT-20_4218 | 1   | 51599    | 50616134 | 28882   | 1  | 1  |
| 2 | BT-20_4218 | 1   | 50616469 | 53199029 | 1148    | 2  | 0  |
| 3 | BT-20_4218 | 1   | 53199571 | 58595853 | 4291    | 1  | 1  |
| 4 | BT-20_4218 | 1   | 58597518 | 62161587 | 2614    | 2  | 1  |
| 5 | BT-20_4218 | 1   | 62161809 | 63631353 | 1052    | 2  | 0  |
| 6 | BT-20_4218 | 1   | 63631634 | 66046745 | 1904    | 1  | 1  |

Remove the numeric ID part of the cell line names

```
> cellLines.ascat.seg[, 1] <- sub("(\\d+$)", "", cellLines.ascat.seg[,
+   1])
```

Now we call allelic imbalance based on the output from ASCAT. Any time the two alleles are not represented in equal amounts (balanced), that is defined as AI

```
> AI <- c(0, 1)[match(cellLines.ascat.seg[, 6] == cellLines.ascat.seg[,
+   7], c("TRUE", "FALSE"))]
> cellLines.ascat.seg <- cbind(cellLines.ascat.seg[, 1:5], AI,
+   cellLines.ascat.seg[, 6:7])
> head(cellLines.ascat.seg)
```

|   | SampleID | Chr | Start    | End      | nProbes | AI | nA | nB |
|---|----------|-----|----------|----------|---------|----|----|----|
| 1 | BT-20    | 1   | 51599    | 50616134 | 28882   | 0  | 1  | 1  |
| 2 | BT-20    | 1   | 50616469 | 53199029 | 1148    | 1  | 2  | 0  |
| 3 | BT-20    | 1   | 53199571 | 58595853 | 4291    | 0  | 1  | 1  |
| 4 | BT-20    | 1   | 58597518 | 62161587 | 2614    | 1  | 2  | 1  |
| 5 | BT-20    | 1   | 62161809 | 63631353 | 1052    | 1  | 2  | 0  |
| 6 | BT-20    | 1   | 63631634 | 66046745 | 1904    | 0  | 1  | 1  |

Check if any samples failed ASCAT

```
> cellLines.ascat.output$failedarrays
[1] "BT-474_3712"      "HCC38_3392"      "MDA-MB-453_4502"
```

three failed

Analyze the cell lines data for AI

```
> min.probes.c1 <- 500
> indx.c1 <- intersect(rownames(ic50.CL), cellLines.ascat.seg[,
+   1])
```

As MCF7 is a clear outlier in our data, very drug resistant, and it is reported as caspase 3 deficient, this sample is removed.

```
> indx.cl <- indx.cl[!indx.cl == "MCF7"]
> ic50.CL <- ic50.CL[indx.cl, ]
> no.tel.CL <- no.tel(cellLines.ascat.seg, chrominfo = chrominfo,
+   min.probes = min.probes.cl)[indx.cl, ]
> head(no.tel.CL)
```

|         | Telomeric | AI | Mean size | Interstitial | AI  | Mean Size | Wholo | chr | AI | 1 | 2 | 3 | 4 | 5 |
|---------|-----------|----|-----------|--------------|-----|-----------|-------|-----|----|---|---|---|---|---|
| BT-20   |           | 33 | 19885273  |              | 188 | 9720339   |       |     | 1  | 0 | 0 | 0 | 0 | 0 |
| BT-549  |           | 27 | 36632057  |              | 62  | 22282507  |       |     | 3  | 0 | 0 | 0 | 0 | 0 |
| CAMA-1  |           | 22 | 28174680  |              | 98  | 9820586   |       |     | 0  | 0 | 0 | 0 | 0 | 0 |
| HCC1143 |           | 32 | 18706803  |              | 189 | 9971368   |       |     | 0  | 0 | 0 | 0 | 0 | 0 |
| HCC1187 |           | 30 | 21998968  |              | 82  | 18436058  |       |     | 2  | 0 | 0 | 0 | 0 | 0 |
| HCC1954 |           | 25 | 27968028  |              | 156 | 7820720   |       |     | 0  | 0 | 0 | 0 | 0 | 0 |

  

|         | 6 | 7 | 8 | 9 | 10 | 11 | 12 | 13 | 14 | 15 | 16 | 17 | 18 | 19 | 20 | 21 | 22 | 23 |
|---------|---|---|---|---|----|----|----|----|----|----|----|----|----|----|----|----|----|----|
| BT-20   | 0 | 0 | 0 | 0 | 0  | 0  | 0  | 0  | 1  | 0  | 0  | 0  | 0  | 0  | 0  | 0  | 0  | 0  |
| BT-549  | 0 | 0 | 0 | 0 | 0  | 0  | 0  | 0  | 0  | 0  | 0  | 0  | 0  | 1  | 0  | 1  | 1  | 0  |
| CAMA-1  | 0 | 0 | 0 | 0 | 0  | 0  | 0  | 0  | 0  | 0  | 0  | 0  | 0  | 0  | 0  | 0  | 0  | 0  |
| HCC1143 | 0 | 0 | 0 | 0 | 0  | 0  | 0  | 0  | 0  | 0  | 0  | 0  | 0  | 0  | 0  | 0  | 0  | 0  |
| HCC1187 | 0 | 0 | 0 | 0 | 0  | 0  | 0  | 0  | 0  | 0  | 0  | 0  | 0  | 0  | 0  | 1  | 1  | 0  |
| HCC1954 | 0 | 0 | 0 | 0 | 0  | 0  | 0  | 0  | 0  | 0  | 0  | 0  | 0  | 0  | 0  | 0  | 0  | 0  |

```
> no.tel.cna.CL <- no.tel.cna(cellLines.CN.seg, chrominfo = chrominfo,
+   min.probes = min.probes.cl)[indx.cl, ]
> head(no.tel.cna.CL)
```

|         | Total telomeric | CNA | Mean size | Telomeric gain | Mean size | Telomeric loss |
|---------|-----------------|-----|-----------|----------------|-----------|----------------|
| BT-20   |                 | 12  | 7359561   | 6              | 6959751   | 6              |
| BT-549  |                 | 4   | 8708811   | 2              | 2496946   | 2              |
| CAMA-1  |                 | 2   | 4307014   | 2              | 4307014   | 0              |
| HCC1143 |                 | 12  | 11261142  | 9              | 6731372   | 3              |
| HCC1187 |                 | 6   | 2958636   | 6              | 2958636   | 0              |
| HCC1954 |                 | 7   | 5531236   | 6              | 4435542   | 1              |

|         | Mean size | Total whole | chromosome | CNA | Whole | chromosome | gain |
|---------|-----------|-------------|------------|-----|-------|------------|------|
| BT-20   | 7759371   |             |            | 0   |       |            | 0    |
| BT-549  | 14920676  |             |            | 0   |       |            | 0    |
| CAMA-1  | NaN       |             |            | 0   |       |            | 0    |
| HCC1143 | 24850450  |             |            | 1   |       |            | 1    |
| HCC1187 | NaN       |             |            | 0   |       |            | 0    |
| HCC1954 | 12105397  |             |            | 0   |       |            | 0    |

|         | Whole chromosome loss |
|---------|-----------------------|
| BT-20   | 0                     |
| BT-549  | 0                     |
| CAMA-1  | 0                     |
| HCC1143 | 0                     |
| HCC1187 | 0                     |
| HCC1954 | 0                     |

```
> no.cna.CL <- gaps(cellLines.CN.seg, min.probes = min.probes.cl)[indx.cl,
+ ]
> head(no.cna.CL)
```

|       | Short Aberrations | Long Aberrations | Short gains | Short deletions |
|-------|-------------------|------------------|-------------|-----------------|
| BT-20 | 0                 | 87               | 0           | 0               |

|         |   |     |   |   |
|---------|---|-----|---|---|
| BT-549  | 0 | 41  | 0 | 0 |
| CAMA-1  | 0 | 35  | 0 | 0 |
| HCC1143 | 0 | 106 | 0 | 0 |
| HCC1187 | 0 | 77  | 0 | 0 |
| HCC1954 | 0 | 80  | 0 | 0 |

|         | Total Gains | Total Deletions | Total Aberrations |
|---------|-------------|-----------------|-------------------|
| BT-20   | 61          | 26              | 87                |
| BT-549  | 24          | 17              | 41                |
| CAMA-1  | 22          | 13              | 35                |
| HCC1143 | 93          | 13              | 106               |
| HCC1187 | 66          | 11              | 77                |
| HCC1954 | 68          | 12              | 80                |



## 2.2 Load the Heiser et al cell line data

This is the cell line data from the Heiser et al, 2011, PNAS paper. The SNP data was pre-processed in the same manner as the SNP data from the Sanger center

Here we load the output from ASCAT

```
> load("heiser_cl.ascat_out.RData")
> str(heiser_cl.ascat_out)
```

List of 7

```
$ nA          : num [1:1868855, 1:37] 2 2 2 2 2 2 2 2 2 2 ...
..- attr(*, "dimnames")=List of 2
.. ..$ : chr [1:1868855] "CN_473963" "CN_473964" "CN_473965" "CN_477984" ...
.. ..$ : chr [1:37] "080122_SNP6.0_184B5_B01" "080122_SNP6.0_185A1_A01" "080122_SNP6.0_600MPE_C
$ nB          : num [1:1868855, 1:37] 0 0 0 0 0 0 0 0 0 0 ...
..- attr(*, "dimnames")=List of 2
.. ..$ : chr [1:1868855] "CN_473963" "CN_473964" "CN_473965" "CN_477984" ...
.. ..$ : chr [1:37] "080122_SNP6.0_184B5_B01" "080122_SNP6.0_185A1_A01" "080122_SNP6.0_600MPE_C
$ aberrantcellfraction: num [1:37] 0.9 0.9 0.85 0.83 0.78 1 1 1 1 0.74 ...
$ ploidy        : num [1:37] 2.26 1.97 2.08 4.14 2.56 ...
$ psi          : num [1:37] 2.4 1.95 1.95 3.85 2.45 2.85 2.95 3.5 3.9 3.25 ...
$ failedarrays  : chr [1:16] "080122_SNP6.0_BT549_G01" "080122_SNP6.0_HCC1143_E02" "080122
$ segments      :List of 53
..$ : num [1:114, 1:4] 1 77462 109120 146402 171153 ...
..- attr(*, "dimnames")=List of 2
.. ..$ : NULL
.. ..$ : chr [1:4] "start" "end" "nA" "nB"
..$ : num [1:69, 1:4] 1 78477 79359 110296 111287 ...
..- attr(*, "dimnames")=List of 2
.. ..$ : NULL
.. ..$ : chr [1:4] "start" "end" "nA" "nB"
..$ : num [1:145, 1:4] 1 8899 14959 15110 16138 ...
..- attr(*, "dimnames")=List of 2
.. ..$ : NULL
.. ..$ : chr [1:4] "start" "end" "nA" "nB"
..$ : num [1:419, 1:4] 1 32336 75901 79781 80383 ...
..- attr(*, "dimnames")=List of 2
.. ..$ : NULL
.. ..$ : chr [1:4] "start" "end" "nA" "nB"
..$ : num [1:336, 1:4] 1 19835 20320 28914 30091 ...
..- attr(*, "dimnames")=List of 2
.. ..$ : NULL
.. ..$ : chr [1:4] "start" "end" "nA" "nB"
..$ : num [1:154, 1:4] 1 83214 88610 89775 95631 ...
..- attr(*, "dimnames")=List of 2
.. ..$ : NULL
.. ..$ : chr [1:4] "start" "end" "nA" "nB"
..$ : num [1:117, 1:4] 1 15955 41860 68828 70056 ...
..- attr(*, "dimnames")=List of 2
.. ..$ : NULL
.. ..$ : chr [1:4] "start" "end" "nA" "nB"
..$ : logi NA
..$ : num [1:114, 1:4] 1 6198 6253 24423 51165 ...
..- attr(*, "dimnames")=List of 2
.. ..$ : NULL
```

```

.. .. ..$ : chr [1:4] "start" "end" "nA" "nB"
..$ : logi NA
..$ : num [1:128, 1:4] 1 5807 17708 17761 51986 ...
.. ..- attr(*, "dimnames")=List of 2
.. .. ..$ : NULL
.. .. ..$ : chr [1:4] "start" "end" "nA" "nB"
..$ : num [1:318, 1:4] 1 4938 4961 20801 22308 ...
.. ..- attr(*, "dimnames")=List of 2
.. .. ..$ : NULL
.. .. ..$ : chr [1:4] "start" "end" "nA" "nB"
..$ : num [1:221, 1:4] 1 29047 29918 31992 32164 ...
.. ..- attr(*, "dimnames")=List of 2
.. .. ..$ : NULL
.. .. ..$ : chr [1:4] "start" "end" "nA" "nB"
..$ : num [1:252, 1:4] 1 525 5176 6482 7420 ...
.. ..- attr(*, "dimnames")=List of 2
.. .. ..$ : NULL
.. .. ..$ : chr [1:4] "start" "end" "nA" "nB"
..$ : logi NA
..$ : num [1:152, 1:4] 1 15827 30399 146402 152553 ...
.. ..- attr(*, "dimnames")=List of 2
.. .. ..$ : NULL
.. .. ..$ : chr [1:4] "start" "end" "nA" "nB"
..$ : logi NA
..$ : logi NA
..$ : num [1:300, 1:4] 1 75901 77876 81160 81825 ...
.. ..- attr(*, "dimnames")=List of 2
.. .. ..$ : NULL
.. .. ..$ : chr [1:4] "start" "end" "nA" "nB"
..$ : num [1:414, 1:4] 1 16135 36693 37254 53094 ...
.. ..- attr(*, "dimnames")=List of 2
.. .. ..$ : NULL
.. .. ..$ : chr [1:4] "start" "end" "nA" "nB"
..$ : logi NA
..$ : num [1:167, 1:4] 1 17972 18041 75901 76240 ...
.. ..- attr(*, "dimnames")=List of 2
.. .. ..$ : NULL
.. .. ..$ : chr [1:4] "start" "end" "nA" "nB"
..$ : num [1:305, 1:4] 1 3834 15414 32347 32791 ...
.. ..- attr(*, "dimnames")=List of 2
.. .. ..$ : NULL
.. .. ..$ : chr [1:4] "start" "end" "nA" "nB"
..$ : num [1:455, 1:4] 1 7909 9232 18262 19216 ...
.. ..- attr(*, "dimnames")=List of 2
.. .. ..$ : NULL
.. .. ..$ : chr [1:4] "start" "end" "nA" "nB"
..$ : num [1:179, 1:4] 1 2556 14470 75901 100034 ...
.. ..- attr(*, "dimnames")=List of 2
.. .. ..$ : NULL
.. .. ..$ : chr [1:4] "start" "end" "nA" "nB"
..$ : logi NA
..$ : num [1:371, 1:4] 1 38994 40403 66245 67084 ...
.. ..- attr(*, "dimnames")=List of 2
.. .. ..$ : NULL

```

```

.. .. ..$ : chr [1:4] "start" "end" "nA" "nB"
..$ : num [1:32, 1:4] 1 111859 146402 300065 301116 ...
.. ..- attr(*, "dimnames")=List of 2
.. .. ..$ : NULL
.. .. ..$ : chr [1:4] "start" "end" "nA" "nB"
..$ : logi NA
..$ : num [1:191, 1:4] 1 16116 22288 38574 75901 ...
.. ..- attr(*, "dimnames")=List of 2
.. .. ..$ : NULL
.. .. ..$ : chr [1:4] "start" "end" "nA" "nB"
..$ : num [1:256, 1:4] 1 53125 60019 61832 66244 ...
.. ..- attr(*, "dimnames")=List of 2
.. .. ..$ : NULL
.. .. ..$ : chr [1:4] "start" "end" "nA" "nB"
..$ : logi NA
..$ : num [1:108, 1:4] 1 44490 75901 146402 161960 ...
.. ..- attr(*, "dimnames")=List of 2
.. .. ..$ : NULL
.. .. ..$ : chr [1:4] "start" "end" "nA" "nB"
..$ : logi NA
..$ : num [1:210, 1:4] 1 44212 44260 75901 78909 ...
.. ..- attr(*, "dimnames")=List of 2
.. .. ..$ : NULL
.. .. ..$ : chr [1:4] "start" "end" "nA" "nB"
..$ : num [1:497, 1:4] 1 4144 4298 11971 12412 ...
.. ..- attr(*, "dimnames")=List of 2
.. .. ..$ : NULL
.. .. ..$ : chr [1:4] "start" "end" "nA" "nB"
..$ : logi NA
..$ : logi NA
..$ : num [1:97, 1:4] 1 536 20013 20699 73009 ...
.. ..- attr(*, "dimnames")=List of 2
.. .. ..$ : NULL
.. .. ..$ : chr [1:4] "start" "end" "nA" "nB"
..$ : num [1:225, 1:4] 1 5152 22808 31153 32030 ...
.. ..- attr(*, "dimnames")=List of 2
.. .. ..$ : NULL
.. .. ..$ : chr [1:4] "start" "end" "nA" "nB"
..$ : num [1:144, 1:4] 1 60048 60862 79124 79160 ...
.. ..- attr(*, "dimnames")=List of 2
.. .. ..$ : NULL
.. .. ..$ : chr [1:4] "start" "end" "nA" "nB"
..$ : logi NA
..$ : num [1:128, 1:4] 1 15213 66409 67209 74976 ...
.. ..- attr(*, "dimnames")=List of 2
.. .. ..$ : NULL
.. .. ..$ : chr [1:4] "start" "end" "nA" "nB"
..$ : logi NA
..$ : logi NA
..$ : logi NA
..$ : num [1:136, 1:4] 1 12191 58055 60974 61047 ...
.. ..- attr(*, "dimnames")=List of 2
.. .. ..$ : NULL
.. .. ..$ : chr [1:4] "start" "end" "nA" "nB"

```

```

..$ : num [1:327, 1:4] 1 47071 51679 75901 96983 ...
.. ..- attr(*, "dimnames")=List of 2
.. .. ..$ : NULL
.. .. ..$ : chr [1:4] "start" "end" "nA" "nB"
..$ : num [1:149, 1:4] 1 15791 23229 23256 75901 ...
.. ..- attr(*, "dimnames")=List of 2
.. .. ..$ : NULL
.. .. ..$ : chr [1:4] "start" "end" "nA" "nB"
..$ : num [1:222, 1:4] 1 15343 15524 28708 28782 ...
.. ..- attr(*, "dimnames")=List of 2
.. .. ..$ : NULL
.. .. ..$ : chr [1:4] "start" "end" "nA" "nB"
..$ : num [1:253, 1:4] 1 2581 3462 4029 4239 ...
.. ..- attr(*, "dimnames")=List of 2
.. .. ..$ : NULL
.. .. ..$ : chr [1:4] "start" "end" "nA" "nB"
..$ : num [1:267, 1:4] 1 2532 3450 4029 4234 ...
.. ..- attr(*, "dimnames")=List of 2
.. .. ..$ : NULL
.. .. ..$ : chr [1:4] "start" "end" "nA" "nB"
..$ : num [1:299, 1:4] 1 8467 13341 13995 43560 ...
.. ..- attr(*, "dimnames")=List of 2
.. .. ..$ : NULL
.. .. ..$ : chr [1:4] "start" "end" "nA" "nB"

```

Now we load the cell line subtypes, as defined in the original paper. This is supplementary table 1

```

> heiser.cl.sub.mat <- read.xls("heiser.sd01.xls", skip = 1, header = T,
+   row.names = 1, as.is = T)
> heiser.cl.sub <- heiser.cl.sub.mat[1:54, 2]
> names(heiser.cl.sub) <- rownames(heiser.cl.sub.mat[1:54, ])
> heiser.cl.sub

```

|                        |                        |                        |
|------------------------|------------------------|------------------------|
| 184A1                  | 184B5                  | 600MPE                 |
| "Non-malignant, Basal" | "Non-malignant, Basal" | "Luminal"              |
| AU565                  | BT20                   | BT474                  |
| "ERBB2AMP"             | "Basal"                | "ERBB2AMP"             |
| BT483                  | BT549                  | CAMA1                  |
| "Luminal"              | "Claudin-low"          | "Luminal"              |
| HCC1143                | HCC1187                | HCC1395                |
| "Basal"                | "Basal"                | "Claudin-low"          |
| HCC1419                | HCC1428                | HCC1599                |
| "ERBB2AMP"             | "Luminal"              | "Basal"                |
| HCC1806                | HCC1937                | HCC1954                |
| "Basal"                | "Basal"                | "ERBB2AMP"             |
| HCC202                 | HCC2185                | HCC2218                |
| "ERBB2AMP"             | "Luminal"              | "ERBB2AMP"             |
| HCC3153                | HCC38                  | HCC70                  |
| "Basal"                | "Claudin-low"          | "Basal"                |
| HS578T                 | LY2                    | MCF10A                 |
| "Claudin-low"          | "Luminal"              | "Non-malignant, Basal" |
| MCF10F                 | MCF12A                 | MCF7                   |
| "Non-malignant, Basal" | "Non-malignant, Basal" | "Luminal"              |
| MDAMB134VI             | MDAMB157               | MDAMB175VII            |

|               |               |               |
|---------------|---------------|---------------|
| "Luminal"     | "Claudin-low" | "Luminal"     |
| MDAMB231      | MDAMB361      | MDAMB415      |
| "Claudin-low" | "ERBB2AMP"    | "Luminal"     |
| MDAMB436      | MDAMB453      | MDAMB468      |
| "Claudin-low" | "Luminal"     | "Basal"       |
| SKBR3         | SUM102PT      | SUM1315M02    |
| "ERBB2AMP"    | "Basal"       | "Claudin-low" |
| SUM149PT      | SUM159PT      | SUM185PE      |
| "Basal"       | "Claudin-low" | "Luminal"     |
| SUM225CWN     | SUM44PE       | SUM52PE       |
| "ERBB2AMP"    | "Luminal"     | "Luminal"     |
| T47D          | UACC812       | UACC893       |
| "Luminal"     | "ERBB2AMP"    | "Luminal"     |
| ZR751         | ZR7530        | ZR75B         |
| "Luminal"     | "Luminal"     | "Luminal"     |

This is the drug GI50 values from the paper.

```
> heiser.cl.gi50 <- read.xls("heiser.sd02.xlsx", skip = 1, header = T,
+   row.names = 1, as.is = T)
> tmp <- rownames(heiser.cl.gi50)
> heiser.cl.gi50 <- apply(heiser.cl.gi50, 2, as.numeric)
> rownames(heiser.cl.gi50) <- tmp
> head(heiser.cl.gi50)
```

|        |             |           |             |              |             |                        |             |
|--------|-------------|-----------|-------------|--------------|-------------|------------------------|-------------|
|        | X17.AAG     | X5.FdUR   | X5.FU       | AG1024       | AG1478      | Sigma.AKT1.2.inhibitor |             |
| 600MPE | 6.870066    | 4.114703  | NA          | NA           | 3.992638    | NA                     |             |
| AU565  | 7.247734    | 5.183882  | 4.972114    | 4.477121     | 4.568730    | 5.609844               |             |
| BT20   | NA          | NA        | 3.487703    | 4.477121     | NA          | 5.004351               |             |
| BT474  | 7.690189    | 3.172659  | 3.290527    | 4.477121     | 6.174157    | 6.080043               |             |
| BT483  | 6.654451    | 4.480107  | 4.134974    | 4.477121     | 5.638744    | 6.082212               |             |
| BT549  | 7.472463    | 3.735296  | NA          | 4.477121     | 4.410818    | NA                     |             |
|        | Triciribine | AS.252424 | AZD6244     | BEZ235       | BIBW2992    | Bortezomib             | Carboplatin |
| 600MPE | 5.434484    | NA        | NA          | NA           | NA          | 6.372983               | 3.817416    |
| AU565  | 6.801077    | 4.874750  | NA          | 6.591219     | NA          | 8.275530               | 4.943955    |
| BT20   | 5.260587    | 4.648175  | 4.30103     | 5.420143     | 5.558814    | 7.327165               | NA          |
| BT474  | 6.399033    | 5.362300  | 4.30103     | 6.459627     | 8.232475    | 8.130542               | 3.976576    |
| BT483  | 6.906122    | 5.365980  | 4.30103     | 4.949954     | 5.779160    | 7.708806               | 5.822004    |
| BT549  | 4.226665    | NA        | NA          | NA           | NA          | 8.215942               | 4.578513    |
|        | CGC.11047   | CGC.11144 | Cisplatin   | CPT.11       | Docetaxel   | Doxorubicin            | Epirubicin  |
| 600MPE | 3.327431    | 6.485800  | 4.331474    | 4.677356     | 7.009101    | 6.568268               | 6.462843    |
| AU565  | 3.543755    | 6.311005  | 5.728188    | 5.907733     | 8.277936    | 7.025223               | 6.843361    |
| BT20   | NA          | 6.520302  | NA          | NA           | NA          | NA                     | NA          |
| BT474  | 3.569146    | 6.022828  | 4.475537    | 4.108876     | 8.198231    | 6.511953               | 5.170984    |
| BT483  | 3.228546    | 6.251072  | 3.588514    | 5.332785     | 7.633831    | 6.815615               | 6.782119    |
| BT549  | 4.533542    | 6.652128  | 5.418136    | NA           | NA          | NA                     | 6.694356    |
|        | Erlotinib   | Etoposide | Fascaplysin | Geldanamycin | Gemcitabine | Glycyl.H.1152          |             |
| 600MPE | 4.281280    | 5.011165  | 6.544616    | 7.414693     | 7.638963    | NA                     |             |
| AU565  | 4.884756    | 6.174357  | 6.920960    | 7.287818     | 7.808269    | 5.141460               |             |
| BT20   | 5.696155    | 5.475872  | 6.506515    | NA           | NA          | 5.146230               |             |
| BT474  | 4.977173    | 4.723689  | 6.720573    | 7.841636     | 3.978604    | 4.176091               |             |
| BT483  | 4.176091    | 5.370604  | 7.182715    | 6.839121     | 8.050328    | 4.353635               |             |
| BT549  | 4.378272    | 5.856931  | 6.286934    | 8.260421     | 8.173408    | NA                     |             |
|        | GSK923295   | Lapatinib | GSK1070916  | GSK1120212   | TGX.221     | GSK1838705             | GSK461364   |
| 600MPE | 4.477121    | 4.778151  | 5.102796    | 8.166786     | 5.088270    | 6.485846               | 5.161191    |

|                                                                         |          |           |          |          |          |          |          |
|-------------------------------------------------------------------------|----------|-----------|----------|----------|----------|----------|----------|
| AU565                                                                   | 7.615600 | 6.397368  | 5.517298 | 4.821626 | 5.181884 | 5.627646 | 8.348481 |
| BT20                                                                    | NA       | 4.778151  | NA       | NA       | 4.774239 | 4.634534 | NA       |
| BT474                                                                   | 5.418659 | 6.402238  | 5.194975 | 4.778151 | 5.099236 | 5.079197 | 5.069412 |
| BT483                                                                   | 6.444275 | 4.778151  | 5.349720 | 4.778151 | 5.367208 | 5.515607 | 5.354183 |
| BT549                                                                   | NA       | 4.778151  | NA       | 5.166945 | 4.615909 | 5.210978 | NA       |
| GSK2119563 GSK2126458 GSK1487371 GSK1059615 Ibandronate.sodium.salt     |          |           |          |          |          |          |          |
| 600MPE                                                                  | 6.229963 | 8.220457  | NA       | 6.310266 |          |          | NA       |
| AU565                                                                   | 6.253141 | 8.099501  | 5.892357 | 6.316662 |          | 3.744760 |          |
| BT20                                                                    | 5.968889 | 7.796358  | 4.176091 | NA       |          | 4.685680 |          |
| BT474                                                                   | 6.821881 | 8.361199  | NA       | 6.800504 |          | 3.980996 |          |
| BT483                                                                   | 7.465795 | 8.938289  | 5.569299 | NA       |          | 4.239874 |          |
| BT549                                                                   | 5.383742 | 7.317398  | 5.453782 | 5.730035 |          |          | NA       |
| ICRF.193 Gefitinib Ixabepilone LBH589 Lestaurtinib Methotrexate         |          |           |          |          |          |          |          |
| 600MPE                                                                  | NA       | 5.137746  | 5.282331 | 6.728689 | 5.770670 | 3.778086 |          |
| AU565                                                                   | 6.138037 | 5.973781  | 8.369717 | 6.978742 | 6.072466 | 3.778076 |          |
| BT20                                                                    | 4.380211 | NA        | 8.085915 | 6.413439 | 5.486464 | 3.477121 |          |
| BT474                                                                   | 4.301030 | 6.142289  | 8.078522 | 7.456178 | 6.608762 | 3.477121 |          |
| BT483                                                                   | NA       | 5.207217  | 5.267766 | 7.136833 | 6.126210 | NA       |          |
| BT549                                                                   | NA       | 4.815894  | 8.221909 | NA       | NA       | 3.477121 |          |
| MLN4924 NSC.663284 Nutlin.3a NU6102 Oxaliplatin Oxamflatin Paclitaxel   |          |           |          |          |          |          |          |
| 600MPE                                                                  | 6.425884 | 5.335674  | 4.323718 | NA       | 4.889908 | NA       | 7.184148 |
| AU565                                                                   | 6.738754 | 5.807986  | 4.789681 | 4.639439 | 5.545216 | 6.189237 | 8.085250 |
| BT20                                                                    | 5.563240 | 5.476108  | 4.466768 | 4.231694 | NA       | 5.416749 | NA       |
| BT474                                                                   | 6.244667 | 5.563850  | 4.389384 | 4.555317 | 4.731504 | 6.567702 | 7.991164 |
| BT483                                                                   | 4.476286 | 6.016736  | 5.191499 | 4.176091 | 4.560631 | 6.146007 | 7.460540 |
| BT549                                                                   | NA       | NA        | 4.345300 | NA       | 5.716196 | NA       | NA       |
| PD173074 PD.98059 Pemetrexed Purvalanol.A L.779450 Rapamycin Vorinostat |          |           |          |          |          |          |          |
| 600MPE                                                                  | 5.010740 | 4.301030  | NA       | 4.519392 | NA       | NA       | 4.153605 |
| AU565                                                                   | 5.125665 | 5.124362  | 2.533948 | 5.009951 | 4.477121 | 7.498848 | 4.075512 |
| BT20                                                                    | 4.795618 | 4.044107  | NA       | 4.564674 | 4.436846 | 7.869113 | 3.716947 |
| BT474                                                                   | 4.477121 | 4.000000  | 2.533948 | 3.778151 | 4.727404 | 7.816706 | 4.262598 |
| BT483                                                                   | NA       | 4.124939  | 2.533948 | 4.402312 | 4.839597 | 8.777219 | 4.227087 |
| BT549                                                                   | 5.133112 | NA        | 2.533948 | 3.778151 | NA       | 4.477121 | 3.828892 |
| SB.3CT Ispinesib Bosutinib Sorafenib Sunitinib.Malate Tamoxifen         |          |           |          |          |          |          |          |
| 600MPE                                                                  | NA       | 7.679567  | 5.053721 | 4.342794 |          | 5.366754 | 4.320089 |
| AU565                                                                   | 4.000000 | 7.649836  | 5.674507 | 3.750202 |          | 5.423731 | 4.537336 |
| BT20                                                                    | 4.423512 | 7.771662  | 5.862346 | 4.202799 |          | 4.784269 | NA       |
| BT474                                                                   | 4.985933 | 7.290497  | 6.141099 | 3.997965 |          | 4.765132 | 5.621945 |
| BT483                                                                   | 4.590438 | 10.313162 | 5.449399 | 4.925334 |          | 4.729170 | 4.621294 |
| BT549                                                                   | NA       | 7.332658  | NA       | 3.921788 |          | 5.288711 | 3.778151 |
| TCS.JNK.5a TCS.2312.dihydrochloride Temsirolimus TPCA.1 Topotecan       |          |           |          |          |          |          |          |
| 600MPE                                                                  | NA       |           | 6.216676 | 4.743841 | 4.176091 |          | NA       |
| AU565                                                                   | NA       |           | 6.563285 | 6.996419 | 4.176091 | 7.725173 |          |
| BT20                                                                    | 5.970907 |           | 5.703272 | 6.113962 | 4.356667 |          | NA       |
| BT474                                                                   | 4.174785 |           | 6.210980 | 7.869440 | 4.176091 | 5.597722 |          |
| BT483                                                                   | 5.937292 |           | 6.178364 | 4.176090 | NA       | 7.792461 |          |
| BT549                                                                   | NA       |           | NA       | NA       | 4.176091 |          | NA       |
| Trichostatin.A Vinorelbine VX.680 XRP44X ZM.447439                      |          |           |          |          |          |          |          |
| 600MPE                                                                  | 5.184590 | 5.289934  | NA       | NA       | NA       |          |          |
| AU565                                                                   | 5.429726 | 8.062586  | 5.663896 | 6.353525 | 5.820232 |          |          |
| BT20                                                                    | 4.806435 | NA        | 4.722649 | 5.291695 | 5.286465 |          |          |
| BT474                                                                   | 5.002392 | 7.322115  | 4.544742 | 5.342283 | 4.200410 |          |          |
| BT483                                                                   | 5.000124 | 8.141970  | 5.441521 | 4.175240 | 4.568856 |          |          |
| BT549                                                                   | 5.131921 | 8.021364  | NA       | NA       | NA       |          |          |

Now organize the output from ASCAT, to get it into a more compact format

```
> heiser.cl.ascat.seg <- organize.ascat.segments(heiser.cl.ascat_out,
+       snp6.markers.ascat)
> head(heiser.cl.ascat.seg)
```

|   | SampleID                | Chr | Start     | End       | nProbes | nA | nB |
|---|-------------------------|-----|-----------|-----------|---------|----|----|
| 1 | 080122_SNP6.0_184B5_B01 | 1   | 51599     | 148116976 | 77461   | 1  | 1  |
| 2 | 080122_SNP6.0_184B5_B01 | 1   | 148117445 | 194506255 | 31658   | 2  | 1  |
| 3 | 080122_SNP6.0_184B5_B01 | 1   | 194506743 | 247191012 | 37282   | 3  | 1  |
| 4 | 080122_SNP6.0_184B5_B01 | 2   | 2785      | 34544573  | 24751   | 1  | 1  |
| 5 | 080122_SNP6.0_184B5_B01 | 2   | 34552819  | 34590562  | 47      | 0  | 0  |
| 6 | 080122_SNP6.0_184B5_B01 | 2   | 34590667  | 137128697 | 62331   | 1  | 1  |

Now we call allelic imbalance based on the output from ASCAT. Any time the two alleles are not represented in equal amounts (balanced), that is defined as AI

```
> AI <- c(0, 1)[match(heiser.cl.ascat.seg[, 6] == heiser.cl.ascat.seg[,
+       7], c("TRUE", "FALSE"))]
> heiser.cl.ascat.seg <- cbind(heiser.cl.ascat.seg[, 1:5], AI,
+       heiser.cl.ascat.seg[, 6:7])
> head(heiser.cl.ascat.seg)
```

|   | SampleID                | Chr | Start     | End       | nProbes | AI | nA | nB |
|---|-------------------------|-----|-----------|-----------|---------|----|----|----|
| 1 | 080122_SNP6.0_184B5_B01 | 1   | 51599     | 148116976 | 77461   | 0  | 1  | 1  |
| 2 | 080122_SNP6.0_184B5_B01 | 1   | 148117445 | 194506255 | 31658   | 1  | 2  | 1  |
| 3 | 080122_SNP6.0_184B5_B01 | 1   | 194506743 | 247191012 | 37282   | 1  | 3  | 1  |
| 4 | 080122_SNP6.0_184B5_B01 | 2   | 2785      | 34544573  | 24751   | 0  | 1  | 1  |
| 5 | 080122_SNP6.0_184B5_B01 | 2   | 34552819  | 34590562  | 47      | 0  | 0  | 0  |
| 6 | 080122_SNP6.0_184B5_B01 | 2   | 34590667  | 137128697 | 62331   | 0  | 1  | 1  |

Check if any samples failed ASCAT

```
> heiser.cl.ascat_out$failedarrays

[1] "080122_SNP6.0_BT549_G01"      "080122_SNP6.0_HCC1143_E02"
[3] "080122_SNP6.0_HCC1500_G02"   "080122_SNP6.0_HCC1599_F06"
[5] "080122_SNP6.0_HCC1937_G06"   "080122_SNP6.0_HCC2185_H06"
[7] "080122_SNP6.0_HS578T_C07"    "080122_SNP6.0_MCF10F_E03"
[9] "080122_SNP6.0_MDAMB157_G03"  "080122_SNP6.0_MDAMB361_A04"
[11] "080122_SNP6.0_MDAMB453_E04"  "080122_SNP6.0_MDAMB468_F04"
[13] "080122_SNP6.0_SUM1315_F07"   "080122_SNP6.0_SUM185PE_E05"
[15] "080122_SNP6.0_SUM225_F05"    "080122_SNP6.0_SUM229_H07"
```

Sixteen failed, fifteen of these had cisplatin GI50 data

Analyze the cell lines data for AI. As this is also based on SNP6, we use the same minimum number of probes as for the Sanger cell lines

```
> no.tel.heiser.cl <- no.tel(heiser.cl.ascat.seg, chrominfo = chrominfo,
+       min.probes = min.probes.cl)
> head(no.tel.heiser.cl)
```

|                          | Telomeric | AI | Mean size | Interstitial | AI  | Mean Size |
|--------------------------|-----------|----|-----------|--------------|-----|-----------|
| 080122_SNP6.0_184B5_B01  |           | 7  | 22200782  |              | 40  | 6993984   |
| 080122_SNP6.0_185A1_A01  |           | 1  | 60692550  |              | 16  | 17015302  |
| 080122_SNP6.0_600MPE_C01 |           | 8  | 26654272  |              | 51  | 4548630   |
| 080122_SNP6.0_AU565_B06  |           | 29 | 19050535  |              | 204 | 7137251   |

```

080122_SNP6.0_BT20_D01          32 21868095          165 10684904
080122_SNP6.0_BT474_E01        14 37289921           48 12459545
      Whole chr AI 1 2 3 4 5 6 7 8 9 10 11 12 13 14 15 16 17
080122_SNP6.0_184B5_B01         1 0 0 0 0 0 0 0 0 0 0 0 0 0 0 0 0 0
080122_SNP6.0_185A1_A01         0 0 0 0 0 0 0 0 0 0 0 0 0 0 0 0 0 0
080122_SNP6.0_600MPE_C01        0 0 0 0 0 0 0 0 0 0 0 0 0 0 0 0 0 0
080122_SNP6.0_AU565_B06         0 0 0 0 0 0 0 0 0 0 0 0 0 0 0 0 0 0
080122_SNP6.0_BT20_D01         0 0 0 0 0 0 0 0 0 0 0 0 0 0 0 0 0 0
080122_SNP6.0_BT474_E01        1 0 0 0 0 0 0 0 0 0 0 0 0 0 0 0 0 0
      18 19 20 21 22 23
080122_SNP6.0_184B5_B01         0 0 1 0 0 0
080122_SNP6.0_185A1_A01         0 0 0 0 0 0
080122_SNP6.0_600MPE_C01        0 0 0 0 0 0
080122_SNP6.0_AU565_B06         0 0 0 0 0 0
080122_SNP6.0_BT20_D01         0 0 0 0 0 0
080122_SNP6.0_BT474_E01         0 0 0 0 1 0

```

Now we fix the names of the SNP files to match the GI50 names

```

> rownames(no.tel.heiser.cl) <- sub("^080122_SNP6.0_", "", rownames(no.tel.heiser.cl))
> rownames(no.tel.heiser.cl) <- sub("^_", "", rownames(no.tel.heiser.cl))
> rownames(no.tel.heiser.cl) <- sub("_\\w+$", "", rownames(no.tel.heiser.cl))
> rownames(no.tel.heiser.cl)

```

```

[1] "184B5" "185A1" "600MPE" "AU565" "BT20" "BT474"
[7] "BT483" "CAMA1" "HCC1187" "HCC1395" "HCC1419" "HCC1428"
[13] "HCC1569" "HCC1954" "HCC202" "HCC2218" "HCC3153" "HCC38"
[19] "HCC70" "LY2" "MCF10A" "MCF12A" "MCF7" "MDAMB231"
[25] "MDAMB415" "MDAMB436" "S1" "SKBR3" "SUM102" "SUM159PT"
[31] "SUM44PE" "SUM52PE" "T47D" "UACC812" "ZR751" "ZR75B"
[37] "HCC1806"

```

match the GI50 to the SNP data

```

> indx.heiser <- intersect(rownames(no.tel.heiser.cl), rownames(heiser.cl.gi50))
> indx.heiser

```

```

[1] "600MPE" "AU565" "BT20" "BT474" "BT483" "CAMA1"
[7] "HCC1187" "HCC1395" "HCC1419" "HCC1428" "HCC1954" "HCC202"
[13] "HCC3153" "HCC38" "HCC70" "LY2" "MCF7" "MDAMB231"
[19] "MDAMB415" "MDAMB436" "SKBR3" "SUM159PT" "SUM44PE" "SUM52PE"
[25] "T47D" "UACC812" "ZR751" "ZR75B" "HCC1806"

```



### 2.3 Load the Cisplatin-1 trial data

This is the output from ASCAT based on the log2 ratios and B-allele frequencies. To reconstruct this object, retrieve the cisplatin data from GEO, and calculate log2 ratios and BAF either using the submitted processed copy numbers and intensities, or by using the raw cel files.

```
> load("dfci1.ascat.output.RData")
> str(dfci1.ascat.output)
```

List of 7

```
$ nA          : num [1:50000, 1:27] 0 0 0 0 0 0 0 0 0 0 0 ...
..- attr(*, "dimnames")=List of 2
.. ..$ : chr [1:50000] "19503" "50000" "35766" "53523" ...
.. ..$ : chr [1:27] "X1T" "X3T" "X4T" "X5T" ...
$ nB          : num [1:50000, 1:27] 0 0 0 0 0 0 0 0 0 0 0 ...
..- attr(*, "dimnames")=List of 2
.. ..$ : chr [1:50000] "19503" "50000" "35766" "53523" ...
.. ..$ : chr [1:27] "X1" "X3" "X4" "X5" ...
$ aberrantcellfraction: num [1:27] 0.8 0.71 0.49 0.58 0.69 0.87 0.73 0.71 0.56 0.58 ...
$ ploidy        : num [1:27] 3.89 4.29 3.8 2.63 1.93 ...
$ psi           : num [1:27] 2.4 2.5 3.45 2.05 2.2 1.55 1.65 2.35 2 1.9 ...
$ failedarrays   : chr(0)
$ segments      :List of 27
..$ : num [1:122, 1:4] 1 134 385 436 666 ...
.. ..- attr(*, "dimnames")=List of 2
.. .. ..$ : NULL
.. .. ..$ : chr [1:4] "start" "end" "nA" "nB"
..$ : num [1:143, 1:4] 1 642 685 1790 1960 ...
.. ..- attr(*, "dimnames")=List of 2
.. .. ..$ : NULL
.. .. ..$ : chr [1:4] "start" "end" "nA" "nB"
..$ : num [1:94, 1:4] 1 354 824 1308 2375 ...
.. ..- attr(*, "dimnames")=List of 2
.. .. ..$ : NULL
.. .. ..$ : chr [1:4] "start" "end" "nA" "nB"
..$ : num [1:100, 1:4] 1 461 1790 1817 1975 ...
.. ..- attr(*, "dimnames")=List of 2
.. .. ..$ : NULL
.. .. ..$ : chr [1:4] "start" "end" "nA" "nB"
..$ : num [1:46, 1:4] 1 328 1790 3562 5395 ...
.. ..- attr(*, "dimnames")=List of 2
.. .. ..$ : NULL
.. .. ..$ : chr [1:4] "start" "end" "nA" "nB"
..$ : num [1:130, 1:4] 1 157 233 505 1913 ...
.. ..- attr(*, "dimnames")=List of 2
.. .. ..$ : NULL
.. .. ..$ : chr [1:4] "start" "end" "nA" "nB"
..$ : num [1:120, 1:4] 1 122 181 510 1790 ...
.. ..- attr(*, "dimnames")=List of 2
.. .. ..$ : NULL
.. .. ..$ : chr [1:4] "start" "end" "nA" "nB"
..$ : num [1:91, 1:4] 1 349 837 1790 3031 ...
.. ..- attr(*, "dimnames")=List of 2
.. .. ..$ : NULL
```

```

.. .. ..$ : chr [1:4] "start" "end" "nA" "nB"
..$ : num [1:78, 1:4] 1 587 899 1579 1790 ...
.. ..- attr(*, "dimnames")=List of 2
.. .. ..$ : NULL
.. .. ..$ : chr [1:4] "start" "end" "nA" "nB"
..$ : num [1:83, 1:4] 1 286 1108 1296 1418 ...
.. ..- attr(*, "dimnames")=List of 2
.. .. ..$ : NULL
.. .. ..$ : chr [1:4] "start" "end" "nA" "nB"
..$ : num [1:69, 1:4] 1 439 1790 2466 3562 ...
.. ..- attr(*, "dimnames")=List of 2
.. .. ..$ : NULL
.. .. ..$ : chr [1:4] "start" "end" "nA" "nB"
..$ : num [1:40, 1:4] 1 81 379 510 3562 ...
.. ..- attr(*, "dimnames")=List of 2
.. .. ..$ : NULL
.. .. ..$ : chr [1:4] "start" "end" "nA" "nB"
..$ : num [1:82, 1:4] 1 436 487 3562 3804 ...
.. ..- attr(*, "dimnames")=List of 2
.. .. ..$ : NULL
.. .. ..$ : chr [1:4] "start" "end" "nA" "nB"
..$ : num [1:61, 1:4] 1 433 990 1342 1790 ...
.. ..- attr(*, "dimnames")=List of 2
.. .. ..$ : NULL
.. .. ..$ : chr [1:4] "start" "end" "nA" "nB"
..$ : num [1:63, 1:4] 1 1790 3031 3562 6749 ...
.. ..- attr(*, "dimnames")=List of 2
.. .. ..$ : NULL
.. .. ..$ : chr [1:4] "start" "end" "nA" "nB"
..$ : num [1:73, 1:4] 1 584 1031 1620 1790 ...
.. ..- attr(*, "dimnames")=List of 2
.. .. ..$ : NULL
.. .. ..$ : chr [1:4] "start" "end" "nA" "nB"
..$ : num [1:90, 1:4] 1 355 1219 1401 1790 ...
.. ..- attr(*, "dimnames")=List of 2
.. .. ..$ : NULL
.. .. ..$ : chr [1:4] "start" "end" "nA" "nB"
..$ : num [1:28, 1:4] 1 3562 7811 11345 12213 ...
.. ..- attr(*, "dimnames")=List of 2
.. .. ..$ : NULL
.. .. ..$ : chr [1:4] "start" "end" "nA" "nB"
..$ : num [1:78, 1:4] 1 437 1722 1790 1854 ...
.. ..- attr(*, "dimnames")=List of 2
.. .. ..$ : NULL
.. .. ..$ : chr [1:4] "start" "end" "nA" "nB"
..$ : num [1:81, 1:4] 1 579 892 1289 1690 ...
.. ..- attr(*, "dimnames")=List of 2
.. .. ..$ : NULL
.. .. ..$ : chr [1:4] "start" "end" "nA" "nB"
..$ : num [1:139, 1:4] 1 294 387 1468 1859 ...
.. ..- attr(*, "dimnames")=List of 2
.. .. ..$ : NULL
.. .. ..$ : chr [1:4] "start" "end" "nA" "nB"
..$ : num [1:79, 1:4] 1 293 605 1763 1790 ...

```

```

.. ..- attr(*, "dimnames")=List of 2
.. .. ..$ : NULL
.. .. ..$ : chr [1:4] "start" "end" "nA" "nB"
..$ : num [1:82, 1:4] 1 223 409 511 1114 ...
.. ..- attr(*, "dimnames")=List of 2
.. .. ..$ : NULL
.. .. ..$ : chr [1:4] "start" "end" "nA" "nB"
..$ : num [1:76, 1:4] 1 448 486 513 571 ...
.. ..- attr(*, "dimnames")=List of 2
.. .. ..$ : NULL
.. .. ..$ : chr [1:4] "start" "end" "nA" "nB"
..$ : num [1:89, 1:4] 1 466 1790 2390 3031 ...
.. ..- attr(*, "dimnames")=List of 2
.. .. ..$ : NULL
.. .. ..$ : chr [1:4] "start" "end" "nA" "nB"
..$ : num [1:76, 1:4] 1 1790 2221 3031 3562 ...
.. ..- attr(*, "dimnames")=List of 2
.. .. ..$ : NULL
.. .. ..$ : chr [1:4] "start" "end" "nA" "nB"
..$ : num [1:137, 1:4] 1 155 256 330 1290 ...
.. ..- attr(*, "dimnames")=List of 2
.. .. ..$ : NULL
.. .. ..$ : chr [1:4] "start" "end" "nA" "nB"

```

#### Load the probe locations

```

> load("mip1.mark.RData")
> head(mip1.mark)

```

|       | Chrom | Chrom.Pos |
|-------|-------|-----------|
| 19503 | 1     | 2201241   |
| 50000 | 1     | 2779554   |
| 35766 | 1     | 2905810   |
| 53523 | 1     | 3097040   |
| 56321 | 1     | 3117988   |
| 403   | 1     | 3128433   |

This is the raw copy number data.

To reconstruct this object, retrieve the cisplatin data from GEO, and load the copy numbers.

```

> load("dfci1.cna.RData")
> head(dfci1.cna)

```

|       | chr | pos     | X1T       | X3T       | X4T      | X5T      | X6T      | X7T      |          |          |  |  |  |  |
|-------|-----|---------|-----------|-----------|----------|----------|----------|----------|----------|----------|--|--|--|--|
| 19503 | 1   | 2201241 | 0.7322896 | 3.033040  | 2.675703 | 2.814382 | 1.312860 | 1.705795 |          |          |  |  |  |  |
| 50000 | 1   | 2779554 | 1.0434465 | 2.467781  | 3.468592 | 1.852579 | 1.336153 | 1.554029 |          |          |  |  |  |  |
| 35766 | 1   | 2905810 | 0.7644918 | 2.635268  | 3.091216 | 1.919547 | 1.655401 | 1.968056 |          |          |  |  |  |  |
| 53523 | 1   | 3097040 | 0.4989782 | 2.732088  | 2.139864 | 2.219023 | 1.219798 | 1.478493 |          |          |  |  |  |  |
| 56321 | 1   | 3117988 | 0.7234751 | 2.360894  | 1.961882 | 1.681449 | 1.389884 | 1.507168 |          |          |  |  |  |  |
| 403   | 1   | 3128433 | 0.9007065 | 2.529160  | 3.024252 | 2.811464 | 2.188905 | 1.639370 |          |          |  |  |  |  |
|       |     |         | X8T       | X9T       | X10T     | X11T     | X12T     | X13T     | X14T     | X15T     |  |  |  |  |
| 19503 |     |         | 1.063925  | 1.5399472 | 2.736378 | 1.610743 | 2.243210 | 1.987595 | 2.763606 | 1.763510 |  |  |  |  |
| 50000 |     |         | 1.660793  | 1.3794428 | 2.573883 | 1.365603 | 1.976099 | 2.008478 | 2.127013 | 2.198423 |  |  |  |  |
| 35766 |     |         | 1.290003  | 1.9922068 | 2.181665 | 2.200951 | 2.333128 | 1.536065 | 2.253574 | 2.034503 |  |  |  |  |

```

53523 1.026464 1.5037880 2.424278 1.521576 1.871073 1.801794 1.897132 1.656681
56321 1.155907 0.8941049 2.594061 1.483789 1.833122 1.910287 1.906536 1.576959
403 1.345216 2.2676301 2.302845 2.685832 2.165062 1.337980 2.584581 2.057897
      X16T      X17T      X18T      X20T      X21T      X22T      X23T      X24T
19503 2.050863 3.468619 1.779076 2.578868 1.7608849 2.884349 1.900527 1.571811
50000 1.677274 1.731927 1.714514 2.005048 0.5663026 1.604559 2.324549 1.970072
35766 1.960299 2.921513 1.744089 1.817376 0.8532232 1.921688 1.686386 1.790284
53523 1.839832 2.182616 2.111284 2.053501 0.3129118 2.043438 1.569914 1.519021
56321 1.626000 1.328629 1.486406 1.111131 1.4467178 1.293787 1.847027 1.752481
403 2.861951 4.635340 1.419152 2.348123 2.2801015 2.967830 1.784112 1.771836
      X25T      X26T      X27T      X28T      X29T
19503 7.734831 1.573455 4.602028 2.365204 1.633720
50000 1.723822 1.529922 2.452629 1.682278 1.267092
35766 2.940751 1.775539 3.604807 2.074486 1.465220
53523 5.541537 1.227875 2.705153 1.705511 1.537661
56321 1.389048 1.130569 2.982483 1.167176 1.256587
403 3.624598 3.028262 4.629879 1.986001 1.895491

```

**This is the log2 transformed, centered, segmented copy number data.**

**Segmentation was performed using the R package DNACopy with default parameters.**

```

> load("dfci1.cna.seg.RData")
> head(dfci1.cna.seg)

```

```

      ID chrom loc.start  loc.end num.mark seg.mean
1 X1T    1   2201241  9449112     133  -1.1398
2 X1T    1   9821894 26905842     250   0.0519
3 X1T    1  27216671 31047379      52  -0.5478
4 X1T    1  31357051 53946601     230   0.3095
5 X1T    1  54234328 55212450      21   1.4243
6 X1T    1  55281461 61787323     130   0.3348

```

**This is the patient response data using the Miller-Payne grade**

```

> load("dfci1.mpgrade.RData")
> dfci1.mpgrade

```

```

P1 P3 P4 P5 P6 P7 P8 P9 P10 P11 P12 P13 P14 P15 P16 P17 P18 P20 P21 P22
3 5 1 5 1 4 4 5 4 3 1 1 2 0 1 5 5 2 0 2
P23 P24 P25 P26 P27 P28 P29
3 2 3 0 1 2 5

```

**This is the patient germline BRCA1/2 mutation status (1 means mutation)**

```

> load("dfci1.brca.RData")
> dfci1.brca

```

```

P1 P3 P4 P5 P6 P7 P8 P9 P10 P11 P12 P13 P14 P15 P16 P17 P18 P20 P21 P22
0 0 0 1 0 0 0 0 0 0 0 0 0 0 0 0 1 0 0 0
P23 P24 P25 P26 P27 P28 P29
0 1 0 0 0 0 0

```

**Organize Cisplatin-1 trial data**

**First, organize the output from ASCAT, to get it into a more compact format**

```

> dfci1.ascat.seg <- organize.ascat.segments(dfci1.ascat.output,
+     mip1.mark)

```

Now we call allelic imbalance based on the output from ASCAT. Any time the two alleles are not represented in equal amounts (balanced), that is defined as AI

```
> AI <- c(0, 1)[match(dfci1.ascat.seg[, 6] == dfci1.ascat.seg[,
+ 7], c("TRUE", "FALSE"))]
> dfci1.ascat.seg <- cbind(dfci1.ascat.seg[, 1:5], AI, dfci1.ascat.seg[,
+ 6:7])
```

Check if any samples failed ASCAT

```
> dfci1.ascat.output$failedarrays
character(0)
```

None failed

Now we call the number of telomeric, interstitial, and whole chromosome AI in each patient

```
> min.probes.cis1 <- 25
> no.tel.dfci1 <- no.tel(dfci1.ascat.seg, chrominfo = chrominfo,
+ min.probes = min.probes.cis1)
> head(no.tel.dfci1)
```

|     | Telomeric | AI       | Mean size | Interstitial | AI       | Mean Size | Wholo | chr | AI | 1 | 2 | 3 | 4 | 5 | 6 | 7 |
|-----|-----------|----------|-----------|--------------|----------|-----------|-------|-----|----|---|---|---|---|---|---|---|
| X1T | 29        | 26742737 |           | 58           | 20015245 |           | 1     | 0   | 0  | 0 | 0 | 0 | 0 | 0 | 0 | 0 |
| X3T | 33        | 17937674 |           | 61           | 22787871 |           | 0     | 0   | 0  | 0 | 0 | 0 | 0 | 0 | 0 | 0 |
| X4T | 22        | 38135634 |           | 22           | 23873399 |           | 1     | 0   | 0  | 0 | 0 | 0 | 0 | 0 | 0 | 0 |
| X5T | 26        | 33778339 |           | 31           | 25402564 |           | 1     | 0   | 0  | 0 | 0 | 0 | 0 | 0 | 0 | 0 |
| X6T | 17        | 53082764 |           | 9            | 46576320 |           | 2     | 0   | 0  | 0 | 0 | 0 | 0 | 0 | 0 | 0 |
| X7T | 29        | 22273604 |           | 63           | 19399097 |           | 1     | 0   | 0  | 0 | 0 | 0 | 0 | 0 | 0 | 0 |

  

|     | 8 | 9 | 10 | 11 | 12 | 13 | 14 | 15 | 16 | 17 | 18 | 19 | 20 | 21 | 22 | 23 |
|-----|---|---|----|----|----|----|----|----|----|----|----|----|----|----|----|----|
| X1T | 0 | 0 | 0  | 0  | 0  | 0  | 0  | 0  | 0  | 0  | 0  | 0  | 0  | 0  | 0  | 1  |
| X3T | 0 | 0 | 0  | 0  | 0  | 0  | 0  | 0  | 0  | 0  | 0  | 0  | 0  | 0  | 0  | 0  |
| X4T | 0 | 0 | 0  | 0  | 0  | 0  | 1  | 0  | 0  | 0  | 0  | 0  | 0  | 0  | 0  | 0  |
| X5T | 0 | 0 | 0  | 0  | 0  | 0  | 0  | 0  | 0  | 0  | 1  | 0  | 0  | 0  | 0  | 0  |
| X6T | 0 | 0 | 0  | 0  | 0  | 0  | 0  | 1  | 0  | 0  | 0  | 0  | 0  | 0  | 1  | 0  |
| X7T | 0 | 0 | 0  | 0  | 0  | 0  | 0  | 0  | 0  | 0  | 0  | 0  | 0  | 0  | 0  | 1  |

```
> no.tel.cna.dfci1 <- no.tel.cna(dfci1.cna.seg, chrominfo = chrominfo,
+ min.probes = min.probes.cis1)
> head(no.tel.cna.dfci1)
```

|     | Total telomeric | CNA      | Mean size | Telomeric gain | Mean size | Telomeric loss |
|-----|-----------------|----------|-----------|----------------|-----------|----------------|
| X1T | 31              | 20594409 |           | 18             | 15397121  | 13             |
| X3T | 18              | 13173028 |           | 18             | 13173028  | 0              |
| X4T | 11              | 26511695 |           | 6              | 28641692  | 5              |
| X5T | 14              | 16221799 |           | 13             | 14255329  | 1              |
| X6T | 5               | 33009245 |           | 2              | 19790424  | 3              |
| X7T | 22              | 10211666 |           | 21             | 10634565  | 1              |

  

|     | Mean size | Total whole chromosome CNA | Whole chromosome gain |
|-----|-----------|----------------------------|-----------------------|
| X1T | 27790653  | 0                          | 0                     |
| X3T | NaN       | 0                          | 0                     |
| X4T | 23955699  | 0                          | 0                     |
| X5T | 41785913  | 0                          | 0                     |
| X6T | 41821792  | 0                          | 0                     |
| X7T | 1330786   | 0                          | 0                     |

```

Whole chromosome loss
X1T          0
X3T          0
X4T          0
X5T          0
X6T          0
X7T          0

```

```

> no.cna.dfc1 <- gaps(dfc1.cna.seg, min.probes = min.probes.cis1)
> head(no.cna.dfc1)

```

|     | Short Aberrations | Long Aberrations | Short gains | Short deletions | Total Gains |
|-----|-------------------|------------------|-------------|-----------------|-------------|
| X1T | 0                 | 111              | 0           | 0               | 78          |
| X3T | 0                 | 95               | 0           | 0               | 94          |
| X4T | 0                 | 44               | 0           | 0               | 28          |
| X5T | 0                 | 39               | 0           | 0               | 37          |
| X6T | 0                 | 20               | 0           | 0               | 8           |
| X7T | 0                 | 105              | 0           | 0               | 99          |

|     | Total Deletions | Total Aberrations |
|-----|-----------------|-------------------|
| X1T | 33              | 111               |
| X3T | 1               | 95                |
| X4T | 16              | 44                |
| X5T | 2               | 39                |
| X6T | 12              | 20                |
| X7T | 6               | 105               |

## 2.4 Load the Cisplatin-2 trial data

This is the output from ASCAT based on the log2 ratios and B-allele frequencies. To reconstruct this object, retrieve the cisplatin data from GEO, and calculate log2 ratios and BAF either using the submitted processed copy numbers and intensities, or by using the raw cel files.

```
> load("dfci2.ascat.output.RData")
> str(dfci2.ascat.output)
```

List of 7

```
$ nA          : num [1:329951, 1:45] 4 4 4 4 4 4 2 2 4 4 ...
..- attr(*, "dimnames")=List of 2
.. ..$ : chr [1:329951] "amp184660" "amp947" "amp53303" "amp364886" ...
.. ..$ : chr [1:45] "P3" "P6" "P7" "P10" ...
$ nB          : num [1:329951, 1:45] 0 0 0 0 0 0 2 2 0 0 ...
..- attr(*, "dimnames")=List of 2
.. ..$ : chr [1:329951] "amp184660" "amp947" "amp53303" "amp364886" ...
.. ..$ : chr [1:45] "X0721101_A01" "X0721101_A02" "X0721101_A03" "X0721101_A04" ...
$ aberrantcellfraction: num [1:45] 0.59 0.71 0.57 0.29 0.68 0.34 0.81 0.32 0.49 0.68 ...
$ ploidy       : num [1:45] 1.94 1.95 2.08 2.65 1.78 ...
$ psi         : num [1:45] 1.95 1.95 2.05 2.55 1.8 4.05 2.1 1.75 3 2.45 ...
$ failedarrays : chr [1:5] "P12" "P30" "P42" "P19" ...
$ segments    :List of 50
..$ : num [1:286, 1:4] 1 525 715 1039 1065 ...
.. ..- attr(*, "dimnames")=List of 2
.. .. ..$ : NULL
.. .. ..$ : chr [1:4] "start" "end" "nA" "nB"
..$ : num [1:202, 1:4] 1 877 3096 6995 7370 ...
.. ..- attr(*, "dimnames")=List of 2
.. .. ..$ : NULL
.. .. ..$ : chr [1:4] "start" "end" "nA" "nB"
..$ : num [1:174, 1:4] 1 1298 5228 5264 5283 ...
.. ..- attr(*, "dimnames")=List of 2
.. .. ..$ : NULL
.. .. ..$ : chr [1:4] "start" "end" "nA" "nB"
..$ : num [1:91, 1:4] 1 14775 14777 14815 15334 ...
.. ..- attr(*, "dimnames")=List of 2
.. .. ..$ : NULL
.. .. ..$ : chr [1:4] "start" "end" "nA" "nB"
..$ : logi NA
..$ : num [1:124, 1:4] 1 680 3078 3414 11256 ...
.. ..- attr(*, "dimnames")=List of 2
.. .. ..$ : NULL
.. .. ..$ : chr [1:4] "start" "end" "nA" "nB"
..$ : num [1:100, 1:4] 1 1507 1521 14509 14516 ...
.. ..- attr(*, "dimnames")=List of 2
.. .. ..$ : NULL
.. .. ..$ : chr [1:4] "start" "end" "nA" "nB"
..$ : num [1:187, 1:4] 1 4353 5777 8526 10927 ...
.. ..- attr(*, "dimnames")=List of 2
.. .. ..$ : NULL
.. .. ..$ : chr [1:4] "start" "end" "nA" "nB"
..$ : num [1:95, 1:4] 1 14509 15538 15689 17462 ...
.. ..- attr(*, "dimnames")=List of 2
```

```

.. .. ..$ : NULL
.. .. ..$ : chr [1:4] "start" "end" "nA" "nB"
..$ : num [1:117, 1:4] 1 1133 1147 4191 5036 ...
.. ..- attr(*, "dimnames")=List of 2
.. .. ..$ : NULL
.. .. ..$ : chr [1:4] "start" "end" "nA" "nB"
..$ : num [1:70, 1:4] 1 807 7874 8346 10390 ...
.. ..- attr(*, "dimnames")=List of 2
.. .. ..$ : NULL
.. .. ..$ : chr [1:4] "start" "end" "nA" "nB"
..$ : logi NA
..$ : num [1:154, 1:4] 1 2055 6378 16341 16514 ...
.. ..- attr(*, "dimnames")=List of 2
.. .. ..$ : NULL
.. .. ..$ : chr [1:4] "start" "end" "nA" "nB"
..$ : num [1:114, 1:4] 1 6384 14748 14775 17806 ...
.. ..- attr(*, "dimnames")=List of 2
.. .. ..$ : NULL
.. .. ..$ : chr [1:4] "start" "end" "nA" "nB"
..$ : num [1:94, 1:4] 1 1788 2353 3904 14509 ...
.. ..- attr(*, "dimnames")=List of 2
.. .. ..$ : NULL
.. .. ..$ : chr [1:4] "start" "end" "nA" "nB"
..$ : num [1:142, 1:4] 1 1594 2295 3114 3178 ...
.. ..- attr(*, "dimnames")=List of 2
.. .. ..$ : NULL
.. .. ..$ : chr [1:4] "start" "end" "nA" "nB"
..$ : num [1:159, 1:4] 1 489 1340 1397 1591 ...
.. ..- attr(*, "dimnames")=List of 2
.. .. ..$ : NULL
.. .. ..$ : chr [1:4] "start" "end" "nA" "nB"
..$ : num [1:241, 1:4] 1 1917 6365 7915 9202 ...
.. ..- attr(*, "dimnames")=List of 2
.. .. ..$ : NULL
.. .. ..$ : chr [1:4] "start" "end" "nA" "nB"
..$ : num [1:223, 1:4] 1 1687 1892 2595 3307 ...
.. ..- attr(*, "dimnames")=List of 2
.. .. ..$ : NULL
.. .. ..$ : chr [1:4] "start" "end" "nA" "nB"
..$ : num [1:96, 1:4] 1 2391 2430 15597 15685 ...
.. ..- attr(*, "dimnames")=List of 2
.. .. ..$ : NULL
.. .. ..$ : chr [1:4] "start" "end" "nA" "nB"
..$ : num [1:197, 1:4] 1 393 4039 6322 13835 ...
.. ..- attr(*, "dimnames")=List of 2
.. .. ..$ : NULL
.. .. ..$ : chr [1:4] "start" "end" "nA" "nB"
..$ : num [1:185, 1:4] 1 2276 2373 2376 2430 ...
.. ..- attr(*, "dimnames")=List of 2
.. .. ..$ : NULL
.. .. ..$ : chr [1:4] "start" "end" "nA" "nB"
..$ : num [1:101, 1:4] 1 2367 4209 4715 5175 ...
.. ..- attr(*, "dimnames")=List of 2
.. .. ..$ : NULL

```



```

.. .. ..$ : chr [1:4] "start" "end" "nA" "nB"
..$ : logi NA
..$ : num [1:164, 1:4] 1 1383 4013 4022 4080 ...
.. ..- attr(*, "dimnames")=List of 2
.. .. ..$ : NULL
.. .. ..$ : chr [1:4] "start" "end" "nA" "nB"
..$ : logi NA
..$ : num [1:95, 1:4] 1 1496 1552 1658 14509 ...
.. ..- attr(*, "dimnames")=List of 2
.. .. ..$ : NULL
.. .. ..$ : chr [1:4] "start" "end" "nA" "nB"
..$ : logi NA
..$ : num [1:194, 1:4] 1 1003 1120 3011 8251 ...
.. ..- attr(*, "dimnames")=List of 2
.. .. ..$ : NULL
.. .. ..$ : chr [1:4] "start" "end" "nA" "nB"
..$ : num [1:150, 1:4] 1 6378 14509 16702 21423 ...
.. ..- attr(*, "dimnames")=List of 2
.. .. ..$ : NULL
.. .. ..$ : chr [1:4] "start" "end" "nA" "nB"
..$ : num [1:130, 1:4] 1 4619 8319 11227 11428 ...
.. ..- attr(*, "dimnames")=List of 2
.. .. ..$ : NULL
.. .. ..$ : chr [1:4] "start" "end" "nA" "nB"
..$ : num [1:183, 1:4] 1 2151 2187 3993 6380 ...
.. ..- attr(*, "dimnames")=List of 2
.. .. ..$ : NULL
.. .. ..$ : chr [1:4] "start" "end" "nA" "nB"
..$ : num [1:175, 1:4] 1 467 677 695 2441 ...
.. ..- attr(*, "dimnames")=List of 2
.. .. ..$ : NULL
.. .. ..$ : chr [1:4] "start" "end" "nA" "nB"
..$ : num [1:32, 1:4] 1 27722 61145 82223 100190 ...
.. ..- attr(*, "dimnames")=List of 2
.. .. ..$ : NULL
.. .. ..$ : chr [1:4] "start" "end" "nA" "nB"
..$ : num [1:163, 1:4] 1 118 1156 1252 10744 ...
.. ..- attr(*, "dimnames")=List of 2
.. .. ..$ : NULL
.. .. ..$ : chr [1:4] "start" "end" "nA" "nB"
..$ : num [1:39, 1:4] 1 21940 21943 27722 41995 ...
.. ..- attr(*, "dimnames")=List of 2
.. .. ..$ : NULL
.. .. ..$ : chr [1:4] "start" "end" "nA" "nB"
..$ : num [1:45, 1:4] 1 27722 58633 58718 61145 ...
.. ..- attr(*, "dimnames")=List of 2
.. .. ..$ : NULL
.. .. ..$ : chr [1:4] "start" "end" "nA" "nB"
..$ : num [1:31, 1:4] 1 16455 16512 27722 33793 ...
.. ..- attr(*, "dimnames")=List of 2
.. .. ..$ : NULL
.. .. ..$ : chr [1:4] "start" "end" "nA" "nB"
..$ : num [1:178, 1:4] 1 1051 1294 2815 2998 ...
.. ..- attr(*, "dimnames")=List of 2

```

```

.. .. ..$ : NULL
.. .. ..$ : chr [1:4] "start" "end" "nA" "nB"
..$ : num [1:156, 1:4] 1 3484 11289 11310 11641 ...
.. ..- attr(*, "dimnames")=List of 2
.. .. ..$ : NULL
.. .. ..$ : chr [1:4] "start" "end" "nA" "nB"
..$ : num [1:157, 1:4] 1 4052 4065 5941 6352 ...
.. ..- attr(*, "dimnames")=List of 2
.. .. ..$ : NULL
.. .. ..$ : chr [1:4] "start" "end" "nA" "nB"
..$ : num [1:138, 1:4] 1 14509 15750 21433 22092 ...
.. ..- attr(*, "dimnames")=List of 2
.. .. ..$ : NULL
.. .. ..$ : chr [1:4] "start" "end" "nA" "nB"
..$ : num [1:48, 1:4] 1 14509 26483 27722 59390 ...
.. ..- attr(*, "dimnames")=List of 2
.. .. ..$ : NULL
.. .. ..$ : chr [1:4] "start" "end" "nA" "nB"
..$ : num [1:173, 1:4] 1 3951 4026 4037 9379 ...
.. ..- attr(*, "dimnames")=List of 2
.. .. ..$ : NULL
.. .. ..$ : chr [1:4] "start" "end" "nA" "nB"
..$ : num [1:76, 1:4] 1 2849 13820 13936 14509 ...
.. ..- attr(*, "dimnames")=List of 2
.. .. ..$ : NULL
.. .. ..$ : chr [1:4] "start" "end" "nA" "nB"
..$ : num [1:27, 1:4] 1 21817 22137 27722 61145 ...
.. ..- attr(*, "dimnames")=List of 2
.. .. ..$ : NULL
.. .. ..$ : chr [1:4] "start" "end" "nA" "nB"
..$ : num [1:27, 1:4] 1 27722 33237 33252 33268 ...
.. ..- attr(*, "dimnames")=List of 2
.. .. ..$ : NULL
.. .. ..$ : chr [1:4] "start" "end" "nA" "nB"
..$ : num [1:34, 1:4] 1 27722 61015 61145 82223 ...
.. ..- attr(*, "dimnames")=List of 2
.. .. ..$ : NULL
.. .. ..$ : chr [1:4] "start" "end" "nA" "nB"
..$ : num [1:54, 1:4] 1 21818 21956 22059 22074 ...
.. ..- attr(*, "dimnames")=List of 2
.. .. ..$ : NULL
.. .. ..$ : chr [1:4] "start" "end" "nA" "nB"
..$ : num [1:142, 1:4] 1 142 15240 15694 19523 ...
.. ..- attr(*, "dimnames")=List of 2
.. .. ..$ : NULL
.. .. ..$ : chr [1:4] "start" "end" "nA" "nB"

```

### Load the probe locations

```

> load("mip2.mark.RData")
> head(mip2.mark)

```

```

      Chr   Pos
amp184660  1  59369
amp947     1  524446

```

```
amp53303    1 552824
amp364886   1 683543
amp121615   1 744055
amp288732   1 744264
```

**This is the raw copy number data.**

To reconstruct this object, retrieve the cisplatin data from GEO, and load the copy numbers.

```
> load("dfci2.cna.RData")
> head(dfci2.cna)
```

|           | Chromosome | Position | P3      | P4     | P5     | P6     | P7     | P9     | P10    |        |
|-----------|------------|----------|---------|--------|--------|--------|--------|--------|--------|--------|
| amp184660 | 1          | 59369    | 1.6856  | 1.3543 | 1.0100 | 1.8666 | 1.5539 | 1.6091 | 1.7150 |        |
| amp947    | 1          | 524446   | 2.4045  | 3.0214 | 6.2492 | 4.8599 | 6.3046 | 5.3291 | 2.0681 |        |
| amp53303  | 1          | 552824   | 1.1540  | 0.9338 | 0.7626 | 0.9134 | 0.8943 | 1.3836 | 0.8250 |        |
| amp364886 | 1          | 683543   | 1.3990  | 2.5582 | 2.1515 | 2.5753 | 1.7891 | 0.8916 | 2.3242 |        |
| amp121615 | 1          | 744055   | 2.1820  | 1.4104 | 1.0626 | 1.4087 | 1.2543 | 2.1538 | 1.0602 |        |
| amp288732 | 1          | 744264   | 4.9639  | 1.5209 | 1.9715 | 1.9310 | 1.9866 | 2.6213 | 1.8064 |        |
|           | P12        | P13      | P14     | P15    | P17    | P18    | P19    | P20    | P21    |        |
| amp184660 | 0.3588     | 2.2730   | 1.2358  | 1.5687 | 2.0008 | 0.7247 | 1.3374 | 1.5673 | 0.6836 |        |
| amp947    | -0.0200    | 2.9073   | 5.1594  | 4.7980 | 2.0523 | 3.4927 | 3.4999 | 5.0331 | 2.9918 |        |
| amp53303  | 0.3605     | 1.3682   | 0.7386  | 1.4765 | 0.6060 | 0.6779 | 0.7812 | 2.0723 | 0.4630 |        |
| amp364886 | 2.4607     | 2.7326   | 2.1346  | 2.0244 | 2.2404 | 1.6447 | 2.2963 | 2.6832 | 1.6447 |        |
| amp121615 | 0.5685     | 2.1658   | 0.9693  | 1.3474 | 1.1382 | 0.5628 | 0.8342 | 1.6142 | 0.6159 |        |
| amp288732 | 2.2500     | 2.9689   | 2.2714  | 2.3334 | 1.3610 | 1.1392 | 1.3490 | 2.7497 | 0.9734 |        |
|           | P24        | P26      | P27     | P28    | P29    | P30    | P32    | P33    | P34    |        |
| amp184660 | 0.8307     | 2.1412   | 1.5159  | 2.0271 | 1.5289 | 1.4844 | 1.4563 | 1.4315 | 0.8634 |        |
| amp947    | 0.7731     | 4.6372   | 13.5112 | 2.1613 | 0.8438 | 5.0372 | 0.7705 | 5.3915 | 9.5061 |        |
| amp53303  | 0.7081     | 1.3915   | 1.4553  | 0.9354 | 0.4733 | 0.6398 | 0.9077 | 1.2393 | 0.5607 |        |
| amp364886 | 2.4672     | 1.6165   | 4.2043  | 2.9222 | 2.7542 | 2.5122 | 1.6025 | 2.5392 | 0.9930 |        |
| amp121615 | 0.8136     | 1.4012   | 1.0481  | 0.6906 | 1.9269 | 0.7797 | 1.6878 | 0.6717 | 1.1294 |        |
| amp288732 | 0.7855     | 2.0340   | 2.8002  | 1.2249 | 2.6238 | 2.2223 | 3.2103 | 0.8852 | 3.3948 |        |
|           | P35        | P36      | P37     | P39    | P40    | P41    | P42    | P43    | P46    | P48    |
| amp184660 | 1.2485     | 2.7688   | 1.4051  | 2.7214 | 1.9933 | 1.4166 | 0.8789 | 0.9012 | 1.9007 | 0.6528 |
| amp947    | 4.0185     | 1.5600   | 2.1964  | 4.5751 | 4.3604 | 3.6977 | 4.0414 | 2.2604 | 5.5044 | 7.0190 |
| amp53303  | 0.8630     | 1.5967   | 0.7664  | 1.6556 | 1.5178 | 0.8024 | 0.6633 | 0.6035 | 0.9527 | 1.0629 |
| amp364886 | 2.6997     | 2.1458   | 3.3912  | 2.4377 | 2.4183 | 2.2254 | 2.1759 | 3.1786 | 1.6868 | 2.7243 |
| amp121615 | 1.0521     | 1.4217   | 1.4085  | 1.6062 | 1.2727 | 1.0984 | 1.0815 | 1.1966 | 1.8054 | 0.7447 |
| amp288732 | 2.9642     | 2.6145   | 1.8097  | 2.6413 | 2.5504 | 2.1996 | 1.7574 | 2.0518 | 2.0418 | 2.2442 |
|           | P49        | P50      | P51     | P45L   | P45R   |        |        |        |        |        |
| amp184660 | 1.0853     | 1.2873   | 0.6256  | 1.4476 | 1.3291 |        |        |        |        |        |
| amp947    | 3.8069     | 5.0468   | 3.5486  | 2.3083 | 3.1905 |        |        |        |        |        |
| amp53303  | 0.8701     | 0.9387   | 0.4400  | 0.8018 | 0.5623 |        |        |        |        |        |
| amp364886 | 3.4353     | 2.1732   | 2.3056  | 1.6513 | 2.1951 |        |        |        |        |        |
| amp121615 | 1.4685     | 1.6974   | 0.6598  | 1.1061 | 0.7816 |        |        |        |        |        |
| amp288732 | 3.6574     | 3.0803   | 1.5338  | 1.2814 | 2.0949 |        |        |        |        |        |

**This is the log2 transformed, centered, segmented copy number data.**

Segmentation was performed using the R package DNACopy with default parameters.

```
> load("dfci2.cna.seg.RData")
> head(dfci2.cna.seg)
```

| ID | chrom | loc.start | loc.end | num.mark | seg.mean |         |
|----|-------|-----------|---------|----------|----------|---------|
| 1  | P3    | 1         | 59369   | 788822   | 8        | 0.0135  |
| 2  | P3    | 1         | 1038818 | 3749644  | 115      | 0.9012  |
| 3  | P3    | 1         | 3751363 | 6052451  | 290      | 0.3382  |
| 4  | P3    | 1         | 6062727 | 6646393  | 58       | 0.8899  |
| 5  | P3    | 1         | 6662360 | 9930808  | 346      | 0.2469  |
| 6  | P3    | 1         | 9935601 | 11755953 | 156      | -0.0810 |

This is the patient response data using the Miller-Payne grade

```
> load("dfci2.mpgrade.RData")
> dfci2.mpgrade
```

| P3  | P4  | P5  | P6  | P7  | P9  | P10  | P12  | P13 | P14 | P15 | P17 | P18 | P19 | P20 | P21 |
|-----|-----|-----|-----|-----|-----|------|------|-----|-----|-----|-----|-----|-----|-----|-----|
| 4   | 3   | 3   | 4   | 5   | 1   | 1    | 1    | 3   | 1   | 5   | 5   | 1   | 2   | 2   | 2   |
| P24 | P26 | P27 | P28 | P29 | P30 | P32  | P33  | P34 | P35 | P36 | P37 | P39 | P40 | P41 | P42 |
| 2   | 4   | 4   | 0   | 1   | 1   | 1    | NA   | 1   | 1   | 5   | 3   | 2   | 4   | 5   | 2   |
| P43 | P46 | P48 | P49 | P50 | P51 | P45L | P45R |     |     |     |     |     |     |     |     |
| NA  | 1   | 4   | 1   | NA  | 5   | 1    | 5    |     |     |     |     |     |     |     |     |

This is the patient germline BRCA1/2 mutation status (1 means mutation)

```
> load("dfci2.brca.RData")
> dfci2.brca
```

| P3  | P4  | P5  | P6  | P7  | P9  | P10  | P12  | P13 | P14 | P15 | P17 | P18 | P19 | P20 | P21 |
|-----|-----|-----|-----|-----|-----|------|------|-----|-----|-----|-----|-----|-----|-----|-----|
| 0   | 0   | 0   | 0   | 1   | 0   | 0    | 0    | 0   | 0   | 1   | 0   | 0   | 0   | 1   | 0   |
| P24 | P26 | P27 | P28 | P29 | P30 | P32  | P33  | P34 | P35 | P36 | P37 | P39 | P40 | P41 | P42 |
| 0   | 0   | 0   | 0   | 0   | 0   | 0    | 0    | 0   | 0   | 0   | 0   | 0   | 0   | 0   | 1   |
| P43 | P46 | P48 | P49 | P50 | P51 | P45L | P45R |     |     |     |     |     |     |     |     |
| 0   | 0   | 0   | 0   | 0   | 0   | 0    | 0    |     |     |     |     |     |     |     |     |

Organize the Cisplatin-2 trial data

First, organize the output from ASCAT, to get it into a more compact format

```
> dfci2.ascat.seg <- organize.ascat.segments(dfci2.ascat.output,
+     mip2.mark)
```

Now we call allelic imbalance based on the output from ASCAT. Any time the two alleles are not represented in equal amounts (balanced), that is defined as AI

```
> AI <- c(0, 1)[match(dfci2.ascat.seg[, 6] == dfci2.ascat.seg[,
+     7], c("TRUE", "FALSE"))]
> dfci2.ascat.seg <- cbind(dfci2.ascat.seg[, 1:5], AI, dfci2.ascat.seg[,
+     6:7])
```

Check if any samples failed ASCAT

```
> dfci2.ascat.output$failedarrays
```

```
[1] "P12" "P30" "P42" "P19" "P36"
```

5 failed

Remove samples where ASCAT failed, samples from patients that went off trial, and normal samples.

```
> dfci2.samples <- intersect(names(dfci2.mpgrade[!is.na(dfci2.mpgrade)]),
+     unique(dfci2.ascat.seg[, 1]))
```

```
> dfci2.mpgrade <- dfci2.mpgrade[dfci2.samples]
> dfci2.brca <- dfci2.brca[dfci2.samples]
```

```
> min.probes.cis2 <- 200
> no.tel.dfci2 <- no.tel(dfci2.ascat.seg, chrominfo = chrominfo,
+   min.probes = min.probes.cis2)[dfci2.samples, ]
> head(no.tel.dfci2)
```

|    | Telomeric | AI | Mean size | Interstitial | AI  | Mean Size | Wholo | chr | AI | 1 | 2 | 3 | 4 | 5 | 6 | 7 |
|----|-----------|----|-----------|--------------|-----|-----------|-------|-----|----|---|---|---|---|---|---|---|
| P3 |           | 33 | 9621078   |              | 135 | 14881010  |       |     | 0  | 0 | 0 | 0 | 0 | 0 | 0 | 0 |
| P4 |           | 22 | 17062383  |              | 82  | 17221975  |       |     | 0  | 0 | 0 | 0 | 0 | 0 | 0 | 0 |
| P5 |           | 12 | 31685950  |              | 23  | 21686632  |       |     | 5  | 0 | 0 | 0 | 1 | 0 | 0 | 0 |
| P6 |           | 30 | 22204775  |              | 79  | 13743492  |       |     | 0  | 0 | 0 | 0 | 0 | 0 | 0 | 0 |
| P7 |           | 23 | 16864291  |              | 64  | 15306967  |       |     | 0  | 0 | 0 | 0 | 0 | 0 | 0 | 0 |
| P9 |           | 25 | 28508299  |              | 61  | 18168760  |       |     | 2  | 0 | 0 | 0 | 0 | 0 | 0 | 0 |

  

|    | 8 | 9 | 10 | 11 | 12 | 13 | 14 | 15 | 16 | 17 | 18 | 19 | 20 | 21 | 22 | 23 |
|----|---|---|----|----|----|----|----|----|----|----|----|----|----|----|----|----|
| P3 | 0 | 0 | 0  | 0  | 0  | 0  | 0  | 0  | 0  | 0  | 0  | 0  | 0  | 0  | 0  | 0  |
| P4 | 0 | 0 | 0  | 0  | 0  | 0  | 0  | 0  | 0  | 0  | 0  | 0  | 0  | 0  | 0  | 0  |
| P5 | 0 | 0 | 0  | 0  | 0  | 1  | 0  | 0  | 0  | 0  | 0  | 0  | 1  | 0  | 1  | 1  |
| P6 | 0 | 0 | 0  | 0  | 0  | 0  | 0  | 0  | 0  | 0  | 0  | 0  | 0  | 0  | 0  | 0  |
| P7 | 0 | 0 | 0  | 0  | 0  | 0  | 0  | 0  | 0  | 0  | 0  | 0  | 0  | 0  | 0  | 0  |
| P9 | 0 | 0 | 0  | 0  | 0  | 1  | 0  | 0  | 0  | 0  | 0  | 0  | 0  | 0  | 1  | 0  |

```
> no.tel.cna.dfci2 <- no.tel.cna(dfci2.cna.seg, chrominfo = chrominfo,
+   min.probes = min.probes.cis2)[dfci2.samples, ]
> head(no.tel.cna.dfci2)
```

|    | Total telomeric | CNA | Mean size | Telomeric gain | Mean size | Telomeric loss |
|----|-----------------|-----|-----------|----------------|-----------|----------------|
| P3 |                 | 14  | 5505118   |                | 12        | 4220657        |
| P4 |                 | 8   | 6536302   |                | 7         | 4849746        |
| P5 |                 | 8   | 9891869   |                | 8         | 9891869        |
| P6 |                 | 19  | 13167745  |                | 13        | 6246089        |
| P7 |                 | 20  | 15009410  |                | 13        | 10556676       |
| P9 |                 | 20  | 19590463  |                | 3         | 5969351        |

|    | Mean size | Total whole chromosome CNA | Whole chromosome gain |
|----|-----------|----------------------------|-----------------------|
| P3 | 13211880  | 0                          | 0                     |
| P4 | 18342191  | 1                          | 1                     |
| P5 | NaN       | 1                          | 1                     |
| P6 | 28164666  | 2                          | 2                     |
| P7 | 23278773  | 0                          | 0                     |
| P9 | 21994188  | 0                          | 0                     |

|    | Whole chromosome loss |
|----|-----------------------|
| P3 | 0                     |
| P4 | 0                     |
| P5 | 0                     |
| P6 | 0                     |
| P7 | 0                     |
| P9 | 0                     |

```
> no.cna.dfci2 <- gaps(dfci2.cna.seg, min.probes = min.probes.cis2)[dfci2.samples,
+ ]
> head(no.cna.dfci2)
```

|    | Short Aberrations | Long Aberrations | Short gains | Short deletions | Total Gains |
|----|-------------------|------------------|-------------|-----------------|-------------|
| P3 | 0                 | 109              | 0           | 0               | 89          |

|    |                 |                   |   |   |    |
|----|-----------------|-------------------|---|---|----|
| P4 | 0               | 73                | 0 | 0 | 34 |
| P5 | 0               | 42                | 0 | 0 | 40 |
| P6 | 0               | 123               | 0 | 0 | 71 |
| P7 | 0               | 78                | 0 | 0 | 49 |
| P9 | 0               | 111               | 0 | 0 | 24 |
|    | Total Deletions | Total Aberrations |   |   |    |
| P3 | 20              | 109               |   |   |    |
| P4 | 39              | 73                |   |   |    |
| P5 | 2               | 42                |   |   |    |
| P6 | 52              | 123               |   |   |    |
| P7 | 29              | 78                |   |   |    |
| P9 | 87              | 111               |   |   |    |

## 2.5 Load TCGA ovarian data

This is the segmented output from ASCAT based on the log2 ratios and B-allele frequencies. As the ASCAT output for the TCGA ovarian cohort is very big, I am here loading an object where I have already run the "organize.ascat.segments" function. To reconstruct this object, retrieve the TCGA data from the TCGA website, calculate log2 ratios and BAF using your preferred method, then process it using the above function to organize the segments.

```
> load("tcga_ovarian_ascat_seg_sw.RData")
> head(tcga_ovarian_ascat_seg_sw)
```

|   | SampleID     | Chr | Start    | End      | nProbes | nA | nB |
|---|--------------|-----|----------|----------|---------|----|----|
| 1 | TCGA-13-1408 | 1   | 51599    | 26929952 | 15349   | 3  | 1  |
| 2 | TCGA-13-1408 | 1   | 26940267 | 46034716 | 10842   | 2  | 0  |
| 3 | TCGA-13-1408 | 1   | 46034769 | 47656816 | 867     | 2  | 2  |
| 4 | TCGA-13-1408 | 1   | 47657169 | 49221330 | 1189    | 3  | 1  |
| 5 | TCGA-13-1408 | 1   | 49222792 | 60057280 | 7180    | 2  | 2  |
| 6 | TCGA-13-1408 | 1   | 60057975 | 62057956 | 1442    | 2  | 1  |

This is the ASCAT based contamination estimates for each TCGA sample

```
> load("tcga_ovarian_ascat_aberrant.20111220.RData")
> head(tcga_ovarian_ascat_aberrant)
```

| TCGA-13-1408 | TCGA-13-1409 | TCGA-13-1477 | TCGA-13-1482 | TCGA-13-1483 | TCGA-13-1484 |
|--------------|--------------|--------------|--------------|--------------|--------------|
| 0.42         | 0.93         | 0.84         | 0.84         | 0.73         | 0.45         |

This is the patient response data acquired from the TCGA website, clinical info.

Outcome, followup, and recurrence are from the clinical\_patient file, and based on the headers: primary\_therapy\_outcome\_success, days\_to\_last\_followup and days\_to\_tumor\_recurrence. Platinum drug status is from the file clinical\_drug, and the column drug\_name

```
> load("tcga_ovarian_recurrence.20111220.RData")
> head(tcga_ovarian_recurrence)
```

| TCGA-13-1408 | TCGA-13-1409 | TCGA-13-1477 | TCGA-13-1482 | TCGA-13-1483 | TCGA-13-1484 |
|--------------|--------------|--------------|--------------|--------------|--------------|
| "null"       | "null"       | "null"       | "602"        | "296"        | "496"        |

```
> load("tcga_ovarian_followup.20111220.RData")
> head(tcga_ovarian_followup)
```

| TCGA-13-1408 | TCGA-13-1409 | TCGA-13-1477 | TCGA-13-1482 | TCGA-13-1483 | TCGA-13-1484 |
|--------------|--------------|--------------|--------------|--------------|--------------|
| 180          | 208          | 1661         | 1877         | 894          | 2982         |

```
> load("tcga_ovarian_outcome.20111220.RData")
> head(tcga_ovarian_outcome)
```

| TCGA-13-1408       | TCGA-13-1409       | TCGA-13-1477          |
|--------------------|--------------------|-----------------------|
| "PARTIAL RESPONSE" | "null"             | "PROGRESSIVE DISEASE" |
| TCGA-13-1482       | TCGA-13-1483       | TCGA-13-1484          |
| "PARTIAL RESPONSE" | "PARTIAL RESPONSE" | "COMPLETE RESPONSE"   |

```
> load("tcga_ovarian_platinum_drug.20111220.RData")
> head(tcga_ovarian_platinum_drug)
```

| TCGA-13-1408 | TCGA-13-1409 | TCGA-13-1477 | TCGA-13-1482 | TCGA-13-1483 | TCGA-13-1484 |
|--------------|--------------|--------------|--------------|--------------|--------------|
| TRUE         | TRUE         | TRUE         | TRUE         | TRUE         | TRUE         |

This is the BRCA1/2 mutation data, acquired from cBio website

```
> tcga.ov.brca.mut <- read.table("tcga.ov.brcamut.20120201.txt",
+   sep = "\t", header = T, row.names = 1)
> head(tcga.ov.brca.mut)
```

```
          BRCA1 BRCA2
TCGA-04-1331      MUT;
TCGA-04-1332
TCGA-04-1336      MUT;
TCGA-04-1337
TCGA-04-1338
TCGA-04-1342
```

This is the TCGA ovarian expression data. This data was downloaded as CEL files, and normalized using RMA as implemented in the AFFY package

```
> load("tcga.ovarian.20111206.rma.RData")
> tcga.ovarian.20111206.rma
```

```
ExpressionSet (storageMode: lockedEnvironment)
assayData: 22277 features, 584 samples
  element names: exprs
protocolData
  sampleNames:
    AGARS_p_TCGA_B12_RNA_ReDo_HT_HG-U133A_96-HTA_A01_443066.CEL
    AGARS_p_TCGA_B12_RNA_ReDo_HT_HG-U133A_96-HTA_A02_443064.CEL ...
    TARRE_p_MultiPlate_TCGA_SS_MA_Ref_HT_HG-U133A_96-HTA_F08_586108.CEL
    (584 total)
  varLabels: ScanDate
  varMetadata: labelDescription
phenoData
  sampleNames:
    AGARS_p_TCGA_B12_RNA_ReDo_HT_HG-U133A_96-HTA_A01_443066.CEL
    AGARS_p_TCGA_B12_RNA_ReDo_HT_HG-U133A_96-HTA_A02_443064.CEL ...
    TARRE_p_MultiPlate_TCGA_SS_MA_Ref_HT_HG-U133A_96-HTA_F08_586108.CEL
    (584 total)
  varLabels: SampleID TissueID ... adjuvantCetuximab (51 total)
  varMetadata: labelDescription
featureData: none
experimentData: use 'experimentData(object)'
Annotation: hthgu133a
```

Determine which TCGA ovarian samples are useful We are interested in samples with at least 6 months followup, platinum treated. We will define sensitive as no recurrence within 6 months, and either partial or complete response to therapy. Resistant will be defined as recurrence within 6 months, or stable or progressive disease

```
> tmp <- c(0, 1)[match(tcga.ovarian.recurrence == "null", c("TRUE",
+   "FALSE"))]
> tmp1 <- tcga.ovarian.followup
> tmp1[tmp == 1] <- as.numeric(tcga.ovarian.recurrence[tmp == 1])
> tmp <- tmp == 1 & tmp1 <= 180
> names(tmp) <- names(tcga.ovarian.recurrence)
> tcga.ov.outcome.180 <- tcga.ovarian.outcome %in% c("PROGRESSIVE DISEASE",
```



```

+ "STABLE DISEASE")
> tcga.ov.outcome.180[tmp] <- tmp[tmp]
> names(tcga.ov.outcome.180) <- names(tcga.ovarian.recurrence)
> tcga.ov.outcome.180 <- !tcga.ov.outcome.180

```

Now we call allelic imbalance based on the output from ASCAT. Any time the two alleles are not represented in equal amounts (balanced), that is defined as AI

```

> AI <- c(0, 1)[match(tcga_ovarian_ascat_seg_sw[, 6] == tcga_ovarian_ascat_seg_sw[,
+ 7], c("TRUE", "FALSE"))]
> tcga_ovarian_ascat_seg <- cbind(tcga_ovarian_ascat_seg_sw[, 1:5],
+ AI, tcga_ovarian_ascat_seg_sw[, 6:7])

```

Now we call the number of telomeric, interstitial, and whole chromosome AI in each patient

```

> min.probes.tcga <- 500
> no.tel.tcga <- no.tel(tcga_ovarian_ascat_seg, chrominfo = chrominfo,
+ min.probes = min.probes.tcga)
> head(no.tel.tcga)

```

|              | Telomeric | AI       | Mean size | Interstitial | AI | Mean Size | Wholo | chr | AI | 1 | 2 |
|--------------|-----------|----------|-----------|--------------|----|-----------|-------|-----|----|---|---|
| TCGA-13-1408 | 28        | 15655312 | 125       | 11853485     | 0  | 0         | 0     |     |    |   |   |
| TCGA-13-1409 | 19        | 51475372 | 41        | 15505762     | 4  | 0         | 0     |     |    |   |   |
| TCGA-13-1477 | 6         | 56094620 | 4         | 7314540      | 1  | 0         | 0     |     |    |   |   |
| TCGA-13-1482 | 24        | 21894087 | 38        | 18546167     | 1  | 0         | 0     |     |    |   |   |
| TCGA-13-1483 | 24        | 24978548 | 37        | 15408026     | 1  | 0         | 0     |     |    |   |   |
| TCGA-13-1484 | 11        | 46165898 | 17        | 20799284     | 5  | 0         | 0     |     |    |   |   |

  

|              | 3 | 4 | 5 | 6 | 7 | 8 | 9 | 10 | 11 | 12 | 13 | 14 | 15 | 16 | 17 | 18 | 19 | 20 | 21 | 22 | 23 |
|--------------|---|---|---|---|---|---|---|----|----|----|----|----|----|----|----|----|----|----|----|----|----|
| TCGA-13-1408 | 0 | 0 | 0 | 0 | 0 | 0 | 0 | 0  | 0  | 0  | 0  | 0  | 0  | 0  | 0  | 0  | 0  | 0  | 0  | 0  | 0  |
| TCGA-13-1409 | 0 | 0 | 0 | 0 | 0 | 0 | 0 | 0  | 1  | 1  | 0  | 0  | 0  | 0  | 0  | 1  | 0  | 0  | 0  | 1  | 0  |
| TCGA-13-1477 | 0 | 0 | 0 | 0 | 0 | 0 | 0 | 1  | 0  | 0  | 0  | 0  | 0  | 0  | 0  | 0  | 0  | 0  | 0  | 0  | 0  |
| TCGA-13-1482 | 0 | 0 | 0 | 0 | 0 | 0 | 0 | 0  | 0  | 0  | 1  | 0  | 0  | 0  | 0  | 0  | 0  | 0  | 0  | 0  | 0  |
| TCGA-13-1483 | 0 | 0 | 0 | 0 | 0 | 0 | 0 | 0  | 0  | 0  | 0  | 0  | 0  | 0  | 0  | 0  | 0  | 0  | 0  | 1  | 0  |
| TCGA-13-1484 | 0 | 0 | 0 | 0 | 1 | 0 | 0 | 0  | 1  | 0  | 0  | 0  | 0  | 1  | 1  | 0  | 0  | 0  | 0  | 1  | 0  |

### Organize the expression data

```

> tcga.ovarian.eset <- exprs(tcga.ovarian.20111206.rma)
> colnames(tcga.ovarian.eset) <- tcga.ovarian.20111206.rma$SampleID

```

As we are going to use the expression data to investigate BRCA1 expression, we will now identify the optimum probe set to use. Affy identifies two as targeting BRCA1: 204531\_s\_at and 211851\_x\_at. To find out which is better, we use the R package JetSet to find the one that matches better the BRCA1 gene, and is most resistant to degradation.

```

> brca.probe <- jmap(chip = "hgu133a", symbol = "BRCA1")
> brca.probe

```

```

BRCA1
"204531_s_at"

```

## 2.6 Load TCGA breast data

As the TCGA breast data is based on patients that received standard therapy which usually does not include platinum, we only used it to test how the correlation is between BRCA1 expression and NtAI, restricted to the triple negative subtype to match the cisplatin trials sample populations

This is the gene expression data, for the TCGA breast cohort as it was on January 5th, 2012. It is normalized and summarized by TCGA (level 3)

```
> load("tcga.breast.ge.level3.RData")
```

Now we subtype the samples to get a TNBC only cohort

```
> tmp <- pam(cbind(scale(tcga.breast.ge.level3["ESR1", ]), scale(tcga.breast.ge.level3["ERBB2",
+ ])), 3)$cluster
> tcga.breast.pam.sub <- c("ER", "HER2", "TNBC")[match(tmp, c(1,
+ 2, 3))]
> names(tcga.breast.pam.sub) <- names(tmp)
> head(tcga.breast.pam.sub)
```

```
TCGA-A1-A0SD-01 TCGA-A1-A0SE-01 TCGA-A1-A0SH-01 TCGA-A1-A0SJ-01 TCGA-A1-A0SK-01
               "ER"             "ER"             "HER2"             "ER"             "TNBC"
TCGA-A1-A0SM-01
               "HER2"
```

```
> table(tcga.breast.pam.sub)
```

```
tcga.breast.pam.sub
  ER HER2 TNBC
371  59  106
```

This gives us 106 samples TNBC. Of these, there were at the 5th of January 2012 only SNP data with matched normal for 102, which we download, pre-process, and run through ASCAT in the same way as for the TCGA ovarian cancer cohort

This is the ASCAT based contamination estimates for each TCGA sample

```
> load("tcga_breast_tnbc.cont.sw.RData")
> head(tcga_ovarian_ascat_aberrant)
```

```
TCGA-13-1408 TCGA-13-1409 TCGA-13-1477 TCGA-13-1482 TCGA-13-1483 TCGA-13-1484
           0.42           0.93           0.84           0.84           0.73           0.45
```

This is the ASCAT based contamination estimates for each TCGA sample

```
> load("tcga_breast_tnbc.segments.sw.RData")
> head(tcga_ovarian_ascat_seg_sw)
```

```
      SampleID Chr   Start      End nProbes nA nB
1 TCGA-13-1408  1    51599 26929952  15349  3  1
2 TCGA-13-1408  1 26940267 46034716  10842  2  0
3 TCGA-13-1408  1 46034769 47656816    867  2  2
4 TCGA-13-1408  1 47657169 49221330   1189  3  1
5 TCGA-13-1408  1 49222792 60057280   7180  2  2
6 TCGA-13-1408  1 60057975 62057956   1442  2  1
```

### Process and organize the TNBC data

```
> AI <- c(0, 1)[match(tcga_breast_tnbc.segments.sw[, 6] == tcga_breast_tnbc.segments.sw[,
+ 7], c("TRUE", "FALSE"))]
> tcga_breast_tnbc.segments.sw <- cbind(tcga_breast_tnbc.segments.sw[,
+ 1:5], AI, tcga_breast_tnbc.segments.sw[, 6:7])
> min.probes.tcga <- 500
> no.tel.tcga.tnbc <- no.tel(tcga_breast_tnbc.segments.sw, chrominfo = chrominfo,
+ min.probes = min.probes.tcga, min.size = 0)
> head(no.tel.tcga.tnbc)
```

|              | Telomeric | AI | Mean size | Interstitial | AI | Mean     | Size | Wholo | chr | AI | 1 | 2 |
|--------------|-----------|----|-----------|--------------|----|----------|------|-------|-----|----|---|---|
| TCGA-BH-A0B3 |           | 34 | 28646348  |              | 67 | 21267352 |      |       |     | 4  | 0 | 0 |
| TCGA-BH-A0B9 |           | 27 | 22642919  |              | 76 | 18941498 |      |       |     | 0  | 0 | 0 |
| TCGA-B6-A0IK |           | 12 | 44507748  |              | 40 | 17153564 |      |       |     | 8  | 0 | 1 |
| TCGA-BH-A0EO |           | 21 | 40731889  |              | 37 | 27564557 |      |       |     | 9  | 0 | 0 |
| TCGA-B6-A0RE |           | 32 | 30806494  |              | 67 | 26488870 |      |       |     | 1  | 0 | 0 |
| TCGA-AN-A04D |           | 17 | 22293486  |              | 57 | 31195386 |      |       |     | 4  | 0 | 0 |

  

|              | 3 | 4 | 5 | 6 | 7 | 8 | 9 | 10 | 11 | 12 | 13 | 14 | 15 | 16 | 17 | 18 | 19 | 20 | 21 | 22 | 23 |
|--------------|---|---|---|---|---|---|---|----|----|----|----|----|----|----|----|----|----|----|----|----|----|
| TCGA-BH-A0B3 | 0 | 0 | 0 | 0 | 0 | 0 | 1 | 0  | 0  | 0  | 1  | 1  | 0  | 0  | 0  | 0  | 0  | 0  | 0  | 1  | 0  |
| TCGA-BH-A0B9 | 0 | 0 | 0 | 0 | 0 | 0 | 0 | 0  | 0  | 0  | 0  | 0  | 0  | 0  | 0  | 0  | 0  | 0  | 0  | 0  | 0  |
| TCGA-B6-A0IK | 0 | 0 | 0 | 0 | 1 | 0 | 0 | 0  | 0  | 1  | 1  | 1  | 0  | 1  | 0  | 0  | 1  | 0  | 0  | 1  | 0  |
| TCGA-BH-A0EO | 0 | 1 | 1 | 0 | 1 | 0 | 0 | 0  | 0  | 0  | 0  | 1  | 0  | 0  | 1  | 1  | 0  | 0  | 1  | 1  | 1  |
| TCGA-B6-A0RE | 0 | 0 | 0 | 0 | 0 | 0 | 0 | 0  | 0  | 0  | 0  | 0  | 0  | 0  | 0  | 0  | 0  | 0  | 1  | 0  | 0  |
| TCGA-AN-A04D | 0 | 0 | 0 | 0 | 1 | 0 | 0 | 0  | 0  | 0  | 0  | 0  | 0  | 0  | 0  | 1  | 0  | 0  | 1  | 1  | 0  |

### Subset the expression data to match the SNP data

```
> colnames(tcga.breast.ge.level3) <- sub("-01$", "", colnames(tcga.breast.ge.level3))
> tcga.breast.ge.level3 <- tcga.breast.ge.level3[, rownames(no.tel.tcga.tnbc)]
> dim(tcga.breast.ge.level3)
```

```
[1] 17811 90
```

Unfortunately, ASCAT failed on 12 samples, leaving 90 with matched GE.

### 3 Cell lines

#### 3.1 Figure 1

Plot figure 1a

```
> par(las = 2, oma = c(2, 0, 0, 0))
> tmp <- barplot(sort(ic50.CL[, 1], decreasing = T), col = c(2,
+ 3, 4)[match(ic50.CL[order(ic50.CL[, 1], decreasing = T),
+ 2], c("TNBC", "HER2", "ER"))], names.arg = rownames(ic50.CL[order(ic50.CL[,
+ 1], decreasing = T), ]), ylab = expression(paste("Cisplatin ",
+ IC[50], " (" , mu, "M)")), main = "Figure S1", ylim = c(0,
+ 50))
> text(tmp[, 1], sort(ic50.CL[, 1], decreasing = T) + 2, sort(ic50.CL[,
+ 1], decreasing = T))
> legend("topright", legend = c("TNBC", "HER2", "ER"), col = c(2,
+ 3, 4), pch = 15)
```

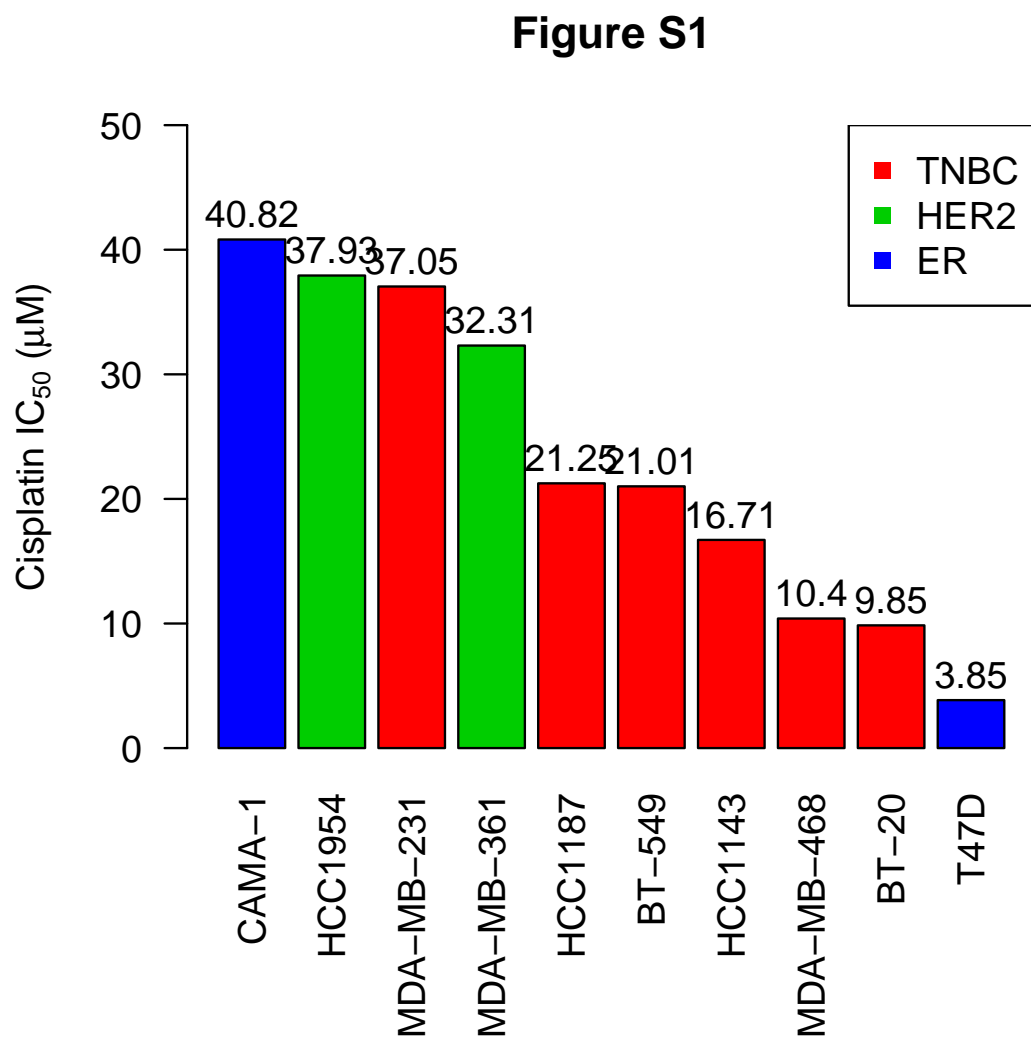

Plot figure 1b

```

> par(las = 1, cex = 1, bty = "l", pty = "s")
> subtype.col <- c(2, 3, 4)[match(ic50.CL[indx.cl, 2], c("TNBC",
+   "HER2", "ER"))]
> plot(-log10(ic50.CL[indx.cl, 1]/1e+06), no.tel.CL[indx.cl, 1],
+   pch = 16, col = subtype.col, main = "Figure 1B", xlab = expression(paste("Cisplatin ",
+   IC[50], " (", mu, "M)")), ylab = "NtAI", ylim = c(20,
+   35), axes = F)
> pos.vec <- c(3, 3, 1, 2, 2, 2, 2, 4, 4, 3)
> text(-log10(ic50.CL[indx.cl, 1]/1e+06), no.tel.CL[indx.cl, 1],
+   indx.cl, pos = pos.vec)
> tmp <- -log10(ic50.CL[indx.cl, 1]/1e+06)
> a <- lm(no.tel.CL[indx.cl, 1] ~ tmp)
> abline(a, lty = 2)
> a <- cor.test(no.tel.CL[indx.cl, 1], tmp, method = "spearman")
> legend("topleft", legend = paste("r = ", signif(a$estimate, 2),
+   ", P = ", signif(a$p.value, 2), sep = ""), lty = -1, pch = -1,
+   bty = "n")
> box()
> axis(2)
> axis(1, at = -log10(c(1000, 100, 50, 25, 10, 5, 1)/1e+06), tick = T,
+   line = 0, labels = c(1000, 100, 50, 25, 10, 5, 1))
> label.panel("b", xoff = 2)

```

b

Figure 1B

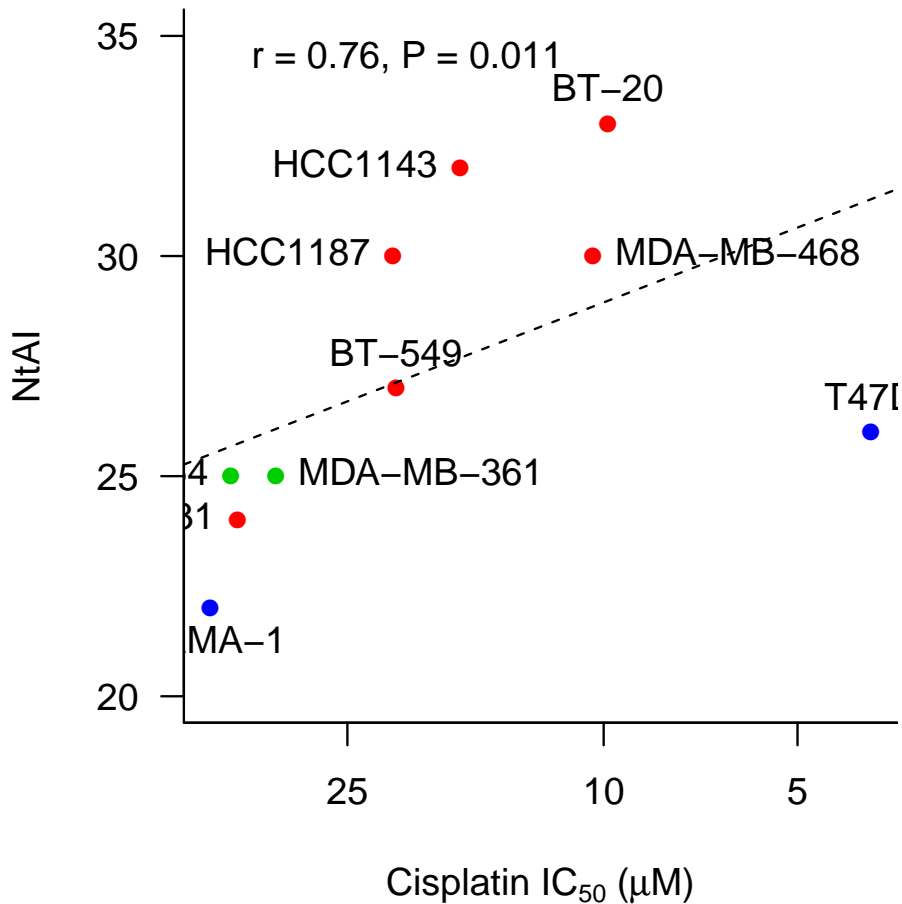

Plot figure 1c

```
> par(las = 1, cex = 1, bty = "l", pty = "s")
> heiser.subtype.col <- c(2, 3, 4, 6)[match(heiser.cl.sub[indx.heiser],
+   c("Basal", "ERBB2AMP", "Luminal", "Claudin-low"))]
> plot(heiser.cl.gi50[indx.heiser, "Cisplatin"], no.tel.heiser.cl[indx.heiser,
+   1], pch = 16, col = heiser.subtype.col, main = "Figure 1C",
+   xlab = expression(paste("Cisplatin ", IC[50], " (" , mu, "M)")),
+   ylab = "NtAI", ylim = c(0, 43), xlim = c(3, 6.5), axes = F)
> text(heiser.cl.gi50[indx.heiser, "Cisplatin"], no.tel.heiser.cl[indx.heiser,
+   1], indx.heiser, pos = 3)
> a <- lm(no.tel.heiser.cl[indx.heiser, 1] ~ heiser.cl.gi50[indx.heiser,
+   "Cisplatin"])
> abline(a, lty = 2)
> a <- cor.test(no.tel.heiser.cl[indx.heiser, 1], heiser.cl.gi50[indx.heiser,
+   "Cisplatin"], method = "spearman")
> legend("topleft", legend = paste("r = ", signif(a$estimate, 2),
+   ", P = ", signif(a$p.value, 2), sep = "" ), lty = -1, pch = -1,
+   bty = "n")
```



|                          |              |             |
|--------------------------|--------------|-------------|
| ZM.447439                | 0.425549091  | 0.061394925 |
| GSK1070916               | 0.385817016  | 0.056802882 |
| GSK461364                | 0.379650111  | 0.061227825 |
| CPT.11                   | 0.371639639  | 0.061568444 |
| Carboplatin              | 0.355963902  | 0.068404000 |
| GSK923295                | 0.346888426  | 0.089345534 |
| TCS.2312.dihydrochloride | 0.342583800  | 0.086673339 |
| Topotecan                | 0.329509062  | 0.100213584 |
| CGC.11047                | 0.328746731  | 0.094073123 |
| VX.680                   | 0.307279390  | 0.164205830 |
| Etoposide                | 0.297603176  | 0.139797062 |
| Vinorelbine              | 0.267890359  | 0.176702620 |
| Glycyl.H.1152            | 0.263823659  | 0.223836459 |
| Ixabepilone              | 0.210027760  | 0.293037817 |
| Ibandronate.sodium.salt  | 0.209118863  | 0.338256651 |
| NSC.663284               | 0.190891810  | 0.371585048 |
| Docetaxel                | 0.185648557  | 0.363879159 |
| PD173074                 | 0.176645420  | 0.420076425 |
| Ispinesib                | 0.172730254  | 0.388926792 |
| Paclitaxel               | 0.160986756  | 0.432073729 |
| Methotrexate             | 0.126782366  | 0.564308578 |
| Nutlin.3a                | 0.116244187  | 0.555817585 |
| Oxaliplatin              | 0.092660706  | 0.645740638 |
| Pemetrexed               | 0.090689773  | 0.695832724 |
| Bortezomib               | 0.088279784  | 0.655085157 |
| AZD6244                  | 0.087326792  | 0.722224757 |
| AG1024                   | 0.081836030  | 0.697361194 |
| Erlotinib                | 0.078070347  | 0.698710648 |
| Gemcitabine              | 0.072945274  | 0.723242362 |
| Bosutinib                | 0.071864221  | 0.738606822 |
| TPCA.1                   | 0.070070992  | 0.756668622 |
| CGC.11144                | 0.069092102  | 0.732023808 |
| X5.FU                    | 0.055954583  | 0.799818312 |
| Triciribine              | 0.054723390  | 0.786314916 |
| Lestaurtinib             | 0.044059492  | 0.841781863 |
| BEZ235                   | 0.027924727  | 0.906967664 |
| MLN4924                  | 0.018740520  | 0.930738589 |
| NU6102                   | 0.018504290  | 0.930042058 |
| Sunitinib.Malate         | 0.011922973  | 0.952933032 |
| Doxorubicin              | 0.011303325  | 0.956295526 |
| Epirubicin               | 0.001743304  | 0.993549599 |
| Tamoxifen                | 0.001546198  | 0.994147433 |
| TCS.JNK.5a               | 0.000000000  | 1.000000000 |
| GSK1120212               | -0.004613722 | 0.981778494 |
| Sorafenib                | -0.025000037 | 0.903512912 |
| Purvalanol.A             | -0.045193979 | 0.833908296 |
| PD.98059                 | -0.046711009 | 0.844959879 |
| TGX.221                  | -0.066243080 | 0.753062253 |
| AS.252424                | -0.078125265 | 0.736412738 |
| X5.FdUR                  | -0.084360655 | 0.688475702 |
| Fascaplysin              | -0.087435137 | 0.664535090 |
| ICRF.193                 | -0.092608707 | 0.681878629 |
| L.779450                 | -0.103980563 | 0.636821587 |
| XRP44X                   | -0.125082076 | 0.560326102 |



|                        |              |             |
|------------------------|--------------|-------------|
| GSK1487371             | -0.131333571 | 0.560173230 |
| Lapatinib              | -0.231616679 | 0.265267399 |
| Vorinostat             | -0.234133340 | 0.230454647 |
| Oxamflatin             | -0.247109373 | 0.233704676 |
| GSK1059615             | -0.258089675 | 0.212905196 |
| X17.AAG                | -0.259158066 | 0.201095412 |
| Geldanamycin           | -0.259976485 | 0.199625554 |
| Gefitinib              | -0.260787916 | 0.198175511 |
| AG1478                 | -0.262569259 | 0.226128026 |
| SB.3CT                 | -0.272236509 | 0.187998085 |
| BIBW2992               | -0.310620539 | 0.224950192 |
| Trichostatin.A         | -0.332557074 | 0.083791096 |
| GSK2119563             | -0.359829219 | 0.065247596 |
| GSK1838705             | -0.363537246 | 0.057223469 |
| GSK2126458             | -0.370835040 | 0.056875269 |
| LBH589                 | -0.374810403 | 0.071136525 |
| Rapamycin              | -0.379355976 | 0.067508033 |
| Temsirolimus           | -0.381295770 | 0.054613389 |
| Sigma.AKT1.2.inhibitor | -0.434518572 | 0.033857624 |

**NtAI is most strongly and most significantly correlated with Cisplatin**

## 3.2 Supplementary figure 2

### Plot supplementary figure 2a

```
> par(las = 1, cex = 1, bty = "l", pty = "s")
> a <- no.tel.CL[indx.cl, 1] + no.tel.CL[indx.cl, 3]
> plot(-log10(ic50.CL[indx.cl, 1]/1e+06), a, pch = 16, col = subtype.col,
+      main = "SFig 2A", xlab = expression(paste("Cisplatin ", IC[50],
+      " (" , mu, "M)")), ylab = "NAI", ylim = c(85, 235), axes = F)
> pos.vec <- c(4, 4, 2, 2, 3, 3, 2, 4, 4, 1)
> text(-log10(ic50.CL[indx.cl, 1]/1e+06), a, indx.cl, pos = pos.vec,
+      )
> tmp <- -log10(ic50.CL[indx.cl, 1]/1e+06)
> b <- lm(a ~ tmp)
> abline(b, lty = 2)
> legend("topleft", legend = paste("r = ", signif(cor.test(a, tmp,
+      method = "spearman")$estimate, digits = 2), ", P = ", signif(cor.test(a,
+      tmp, method = "spearman")$p.value, digits = 2), sep = "")),
+      lty = -1, pch = -1, bty = "n")
> box()
> axis(2)
> axis(1, at = -log10(c(1000, 100, 50, 25, 10, 5, 1)/1e+06), tick = T,
+      line = 0, labels = c(1000, 100, 50, 25, 10, 5, 1))
> label.panel("A", xoff = 2)
```

**A****SFig 2A**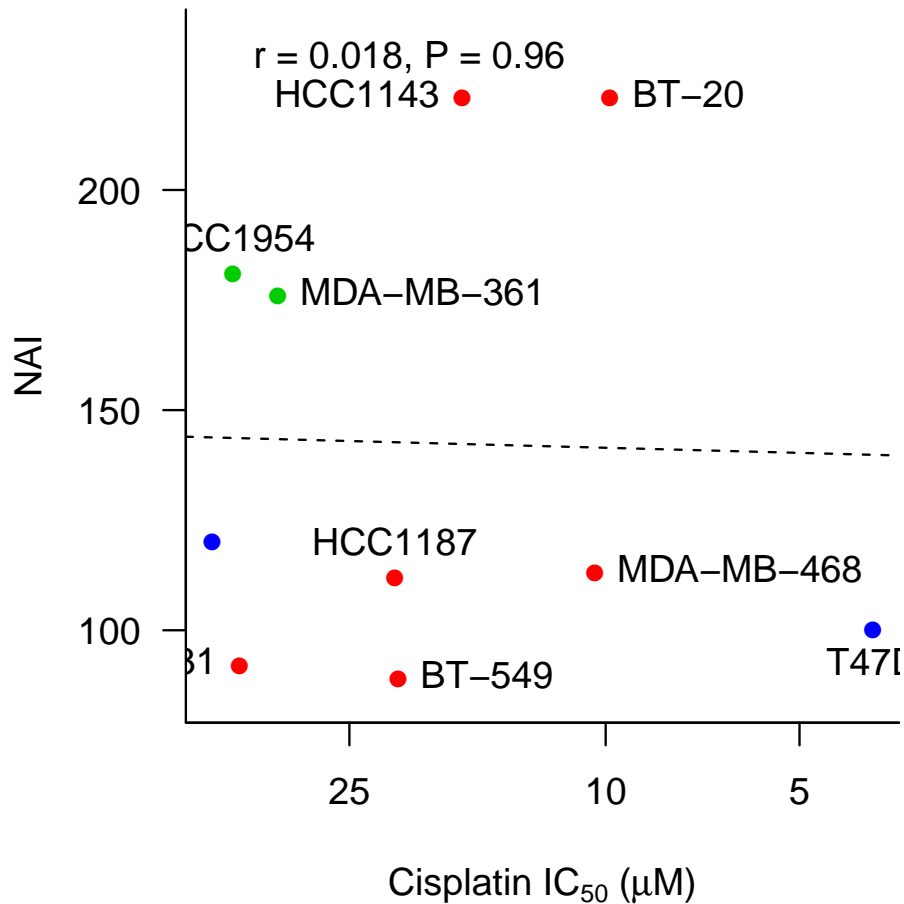

Plot supplementary figure 2b

```

> par(las = 1, cex = 1, bty = "l", pty = "s")
> a <- no.cna.CL[indx.cl, 5] - no.cna.CL[indx.cl, 3]
> plot(-log10(ic50.CL[indx.cl, 1]/1e+06), a, pch = 16, col = subtype.col,
+      main = "SFig 2B", xlab = expression(paste("Cisplatin ", IC[50],
+      " (" , mu, "M)")), ylab = "NGains", ylim = c(0, 120),
+      axes = F)
> pos.vec <- c(4, 3, 2, 3, 1, 1, 2, 3, 1, 4)
> text(-log10(ic50.CL[indx.cl, 1]/1e+06), a, indx.cl, pos = pos.vec,
+      )
> tmp <- -log10(ic50.CL[indx.cl, 1]/1e+06)
> b <- lm(a ~ tmp)
> abline(b, lty = 2)
> legend("topleft", legend = paste("r = ", signif(cor.test(a, tmp,
+      method = "spearman")$estimate, digits = 2), ", P = ", signif(cor.test(a,
+      tmp, method = "spearman")$p.value, digits = 2), sep = "" ),
+      lty = -1, pch = -1, bty = "n")
> box()

```

```

> axis(2)
> axis(1, at = -log10(c(1000, 100, 50, 25, 10, 5, 1)/1e+06), tick = T,
+   line = 0, labels = c(1000, 100, 50, 25, 10, 5, 1))
> label.panel("B", xoff = 2)

```

**B**

**SFig 2B**

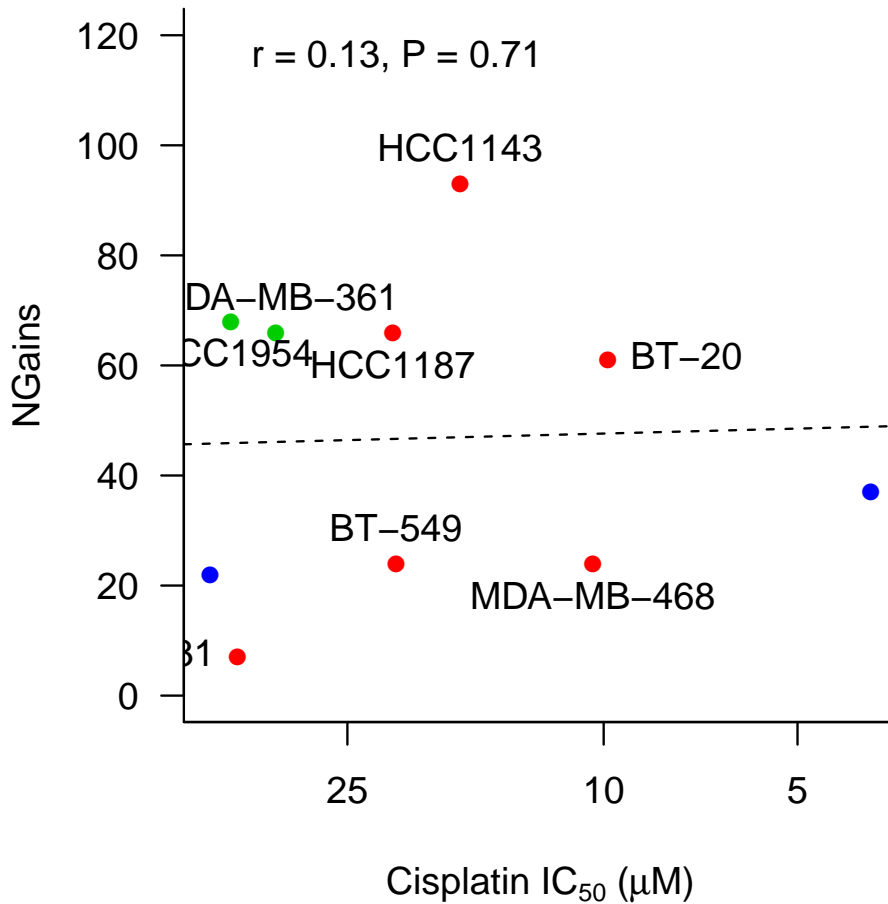

Plot supplementary figure 2c

```

> par(las = 1, cex = 1, bty = "l", pty = "s")
> a <- no.cna.CL[indx.cl, 6] - no.cna.CL[indx.cl, 4]
> plot(-log10(ic50.CL[indx.cl, 1]/1e+06), a, pch = 16, col = subtype.col,
+   main = "SFig 2C", xlab = expression(paste("Cisplatin ", IC[50],
+     " (" , mu, "M)")), ylab = "NLoss", ylim = c(0, 30), axes = F)
> pos.vec <- c(3, 2, 2, 2, 4, 1, 2, 1, 1, 3)
> text(-log10(ic50.CL[indx.cl, 1]/1e+06), a, indx.cl, pos = pos.vec,
+   )
> tmp <- -log10(ic50.CL[indx.cl, 1]/1e+06)
> b <- lm(a ~ tmp)
> abline(b, lty = 2)
> legend("topleft", legend = paste("r = ", signif(cor.test(a, tmp),

```

```

+   method = "spearman")$estimate, digits = 2), ", P = ", signif(cor.test(a,
+   tmp, method = "spearman")$p.value, digits = 2), sep = ""),
+   lty = -1, pch = -1, bty = "n")
> box()
> axis(2)
> axis(1, at = -log10(c(1000, 100, 50, 25, 10, 5, 1)/1e+06), tick = T,
+   line = 0, labels = c(1000, 100, 50, 25, 10, 5, 1))
> label.panel("C", xoff = 2)

```

**C**

**SFig 2C**

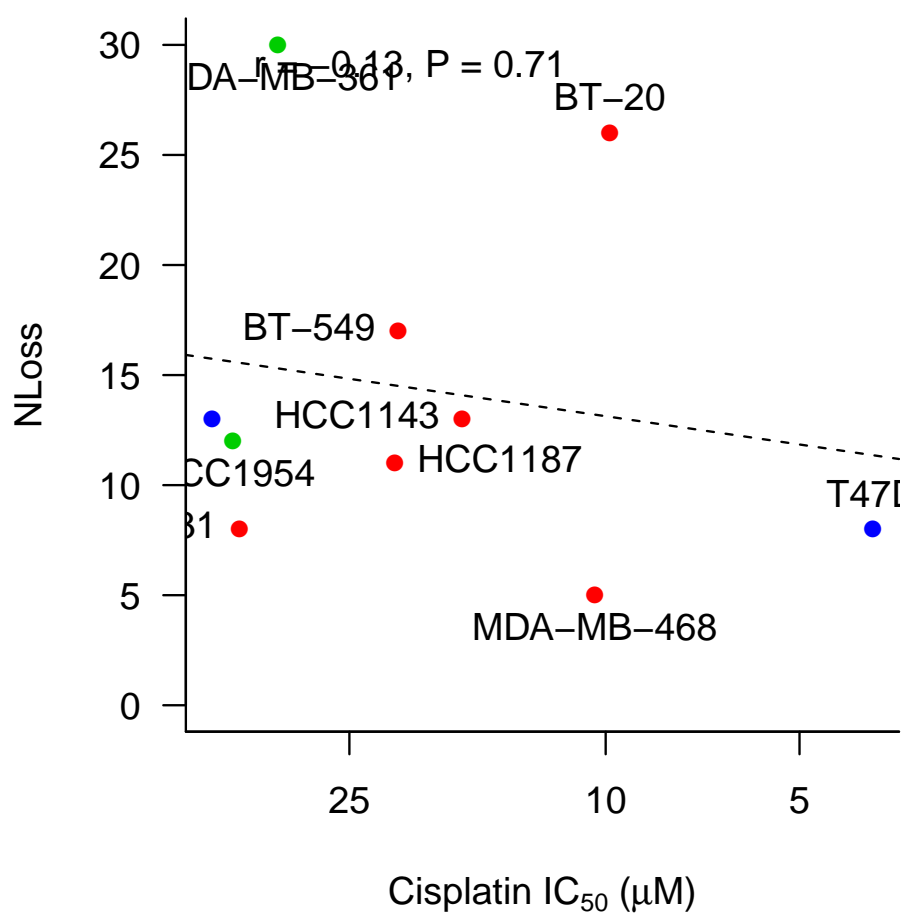

### 3.3 Supplementary figure 3

#### Plot supplementary figure 3A

```
> par(las = 1, cex = 1, bty = "l", pty = "s")
> plot(-log10(ic50.CL[indx.cl, 1]/1e+06), no.tel.cna.CL[indx.cl,
+      3], pch = 16, col = subtype.col, main = "SFig 3A", xlab = expression(paste("Cisplatin ",
+      IC[50], " (" , mu, "M)")), ylab = "NtGain", ylim = c(0, 10),
+      axes = F)
> pos.vec <- c(3, 3, 3, 3, 2, 3, 3, 4, 3, 3)
> text(-log10(ic50.CL[indx.cl, 1]/1e+06), no.tel.cna.CL[indx.cl,
+      3], indx.cl, pos = pos.vec)
> tmp <- -log10(ic50.CL[indx.cl, 1]/1e+06)
> a <- lm(no.tel.cna.CL[indx.cl, 3] ~ tmp)
> abline(a, lty = 2)
> a <- cor.test(no.tel.cna.CL[indx.cl, 3], tmp, method = "spearman")
> legend("topleft", legend = paste("r = ", signif(a$estimate, 2),
+      ", P = ", signif(a$p.value, 2), sep = ""), lty = -1, pch = -1,
+      bty = "n")
> box()
> axis(2)
> axis(1, at = -log10(c(1000, 100, 50, 25, 10, 5, 1)/1e+06), tick = T,
+      line = 0, labels = c(1000, 100, 50, 25, 10, 5, 1))
> label.panel("A", xoff = 2)
```

A

SFig 3A

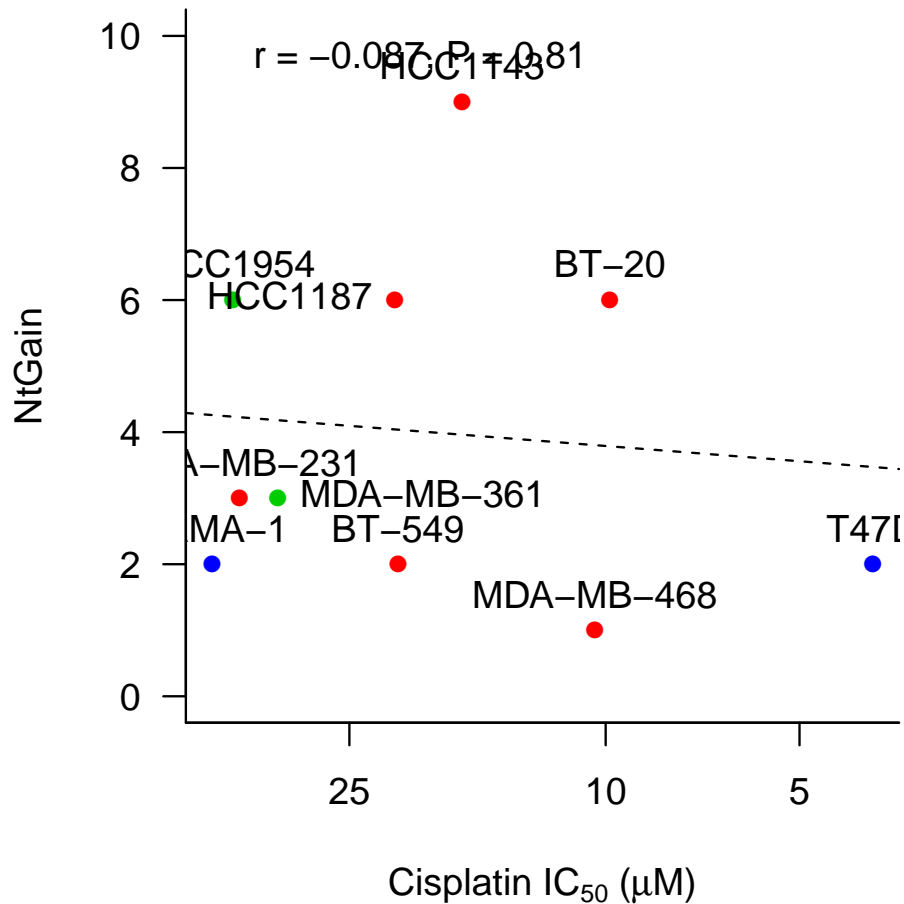

Plot supplementary figure 3B

```
> par(las = 1, cex = 1, bty = "l", pty = "s")
> plot(-log10(ic50.CL[indx.cl, 1]/1e+06), no.tel.cna.CL[indx.cl,
+ 5], pch = 16, col = subtype.col, main = "SFig 3B", xlab = expression(paste("Cisplatin ",
+ IC[50], " (", mu, "M)")), ylab = "NtLoss", ylim = c(0, 7),
+ axes = F)
> pos.vec <- c(3, 2, 2, 3, 3, 4, 3, 3, 3, 3)
> text(-log10(ic50.CL[indx.cl, 1]/1e+06), no.tel.cna.CL[indx.cl,
+ 5], indx.cl, pos = pos.vec)
> tmp <- -log10(ic50.CL[indx.cl, 1]/1e+06)
> a <- lm(no.tel.cna.CL[indx.cl, 5] ~ tmp)
> abline(a, lty = 2)
> a <- cor.test(no.tel.cna.CL[indx.cl, 5], tmp, method = "spearman")
> legend("topleft", legend = paste("r = ", signif(a$estimate, 2),
+ ", P = ", signif(a$p.value, 2), sep = ""), lty = -1, pch = -1,
+ bty = "n")
> box()
> axis(2)
```

```

> axis(1, at = -log10(c(1000, 100, 50, 25, 10, 5, 1)/1e+06), tick = T,
+     line = 0, labels = c(1000, 100, 50, 25, 10, 5, 1))
> label.panel("B", xoff = 2)

```

**B**

### SFig 3B

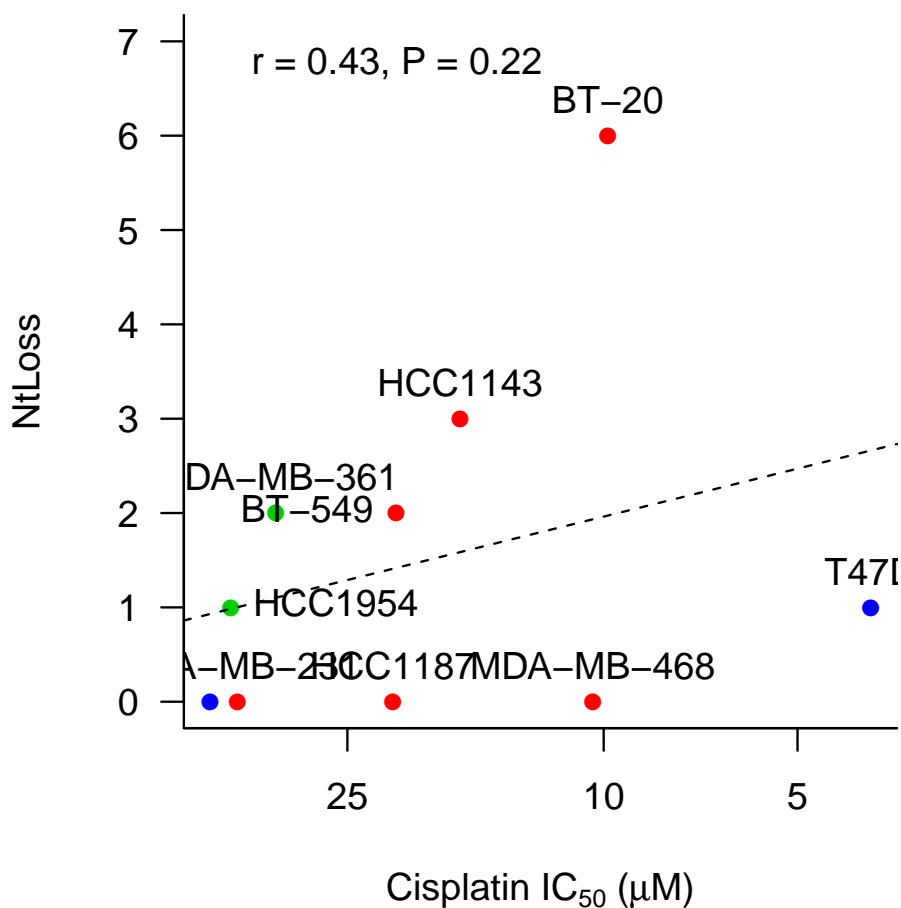

Plot supplementary figure 3C

```

> par(las = 1, cex = 1, bty = "l", pty = "s")
> CL.int.gains <- no.cna.CL[indx.cl, 5] - no.tel.cna.CL[indx.cl,
+ 3]
> plot(-log10(ic50.CL[indx.cl, 1]/1e+06), CL.int.gains, pch = 16,
+     col = subtype.col, main = "SFig 3C", xlab = expression(paste("Cisplatin ",
+     IC[50], " (", mu, "M)")), ylab = "NiGains", ylim = c(0,
+     120), axes = F)
> pos.vec <- c(4, 4, 2, 1, 1, 2, 2, 3, 3, 3)
> text(-log10(ic50.CL[indx.cl, 1]/1e+06), CL.int.gains, indx.cl,
+     pos = pos.vec)
> tmp <- -log10(ic50.CL[indx.cl, 1]/1e+06)
> a <- lm(CL.int.gains ~ tmp)
> abline(a, lty = 2)

```



```

> a <- cor.test(CL.int.gains, tmp, method = "spearman")
> legend("topleft", legend = paste("r = ", signif(a$estimate, 2),
+   ", P = ", signif(a$p.value, 2), sep = ""), lty = -1, pch = -1,
+   bty = "n")
> box()
> axis(2)
> axis(1, at = -log10(c(1000, 100, 50, 25, 10, 5, 1)/1e+06), tick = T,
+   line = 0, labels = c(1000, 100, 50, 25, 10, 5, 1))
> label.panel("C", xoff = 2)

```

**C**

**SFig 3C**

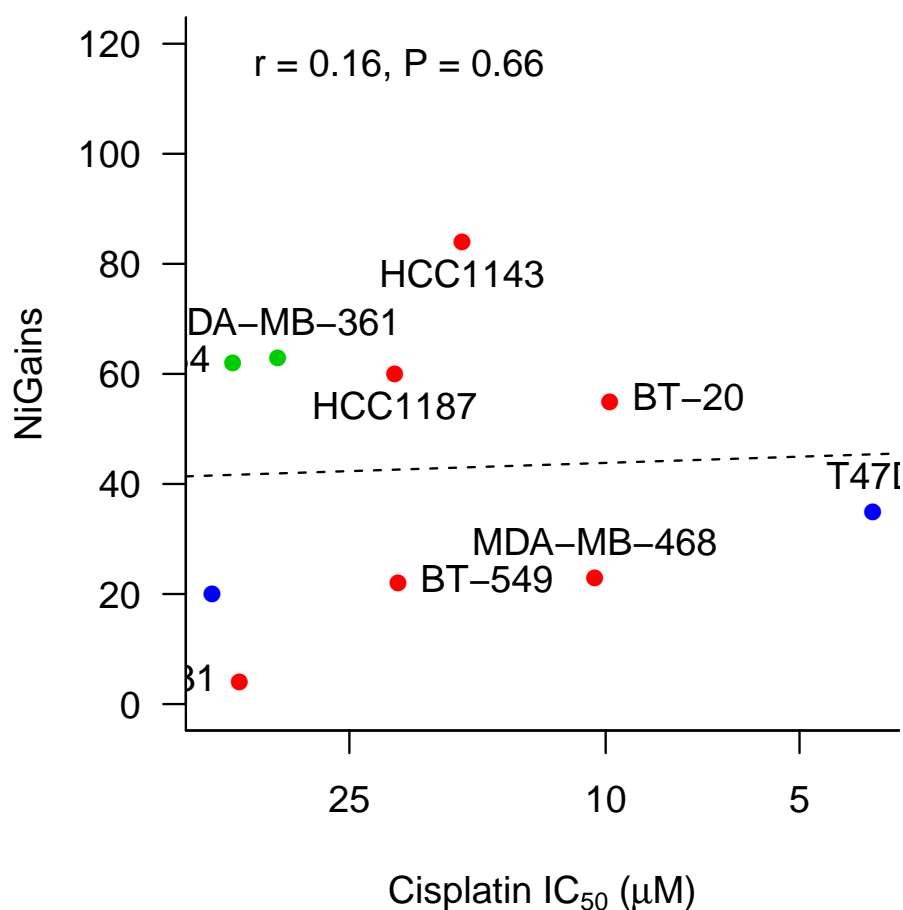

Plot supplementary figure 3D

```

> par(las = 1, cex = 1, bty = "l", pty = "s")
> CL.int.loss <- no.cna.CL[indx.cl, 6] - no.tel.cna.CL[indx.cl,
+   5]
> plot(-log10(ic50.CL[indx.cl, 1]/1e+06), CL.int.loss, pch = 16,
+   col = subtype.col, main = "SFig 3D", xlab = expression(paste("Cisplatin ",
+   IC[50], " (", mu, "M)")), ylab = "NiLoss", ylim = c(0,
+   30), axes = F)

```

```

> pos.vec <- c(4, 2, 4, 2, 3, 2, 3, 4, 2, 3)
> text(-log10(ic50.CL[indx.cl, 1]/1e+06), CL.int.loss, indx.cl,
+     pos = pos.vec)
> tmp <- -log10(ic50.CL[indx.cl, 1]/1e+06)
> a <- lm(CL.int.loss ~ tmp)
> abline(a, lty = 2)
> a <- cor.test(CL.int.loss, tmp, method = "spearman")
> legend("topleft", legend = paste("r = ", signif(a$estimate, 2),
+   ", P = ", signif(a$p.value, 2), sep = ""), lty = -1, pch = -1,
+   bty = "n")
> box()
> axis(2)
> axis(1, at = -log10(c(1000, 100, 50, 25, 10, 5, 1)/1e+06), tick = T,
+   line = 0, labels = c(1000, 100, 50, 25, 10, 5, 1))
> label.panel("D", xoff = 2)

```

**D**

**SFig 3D**

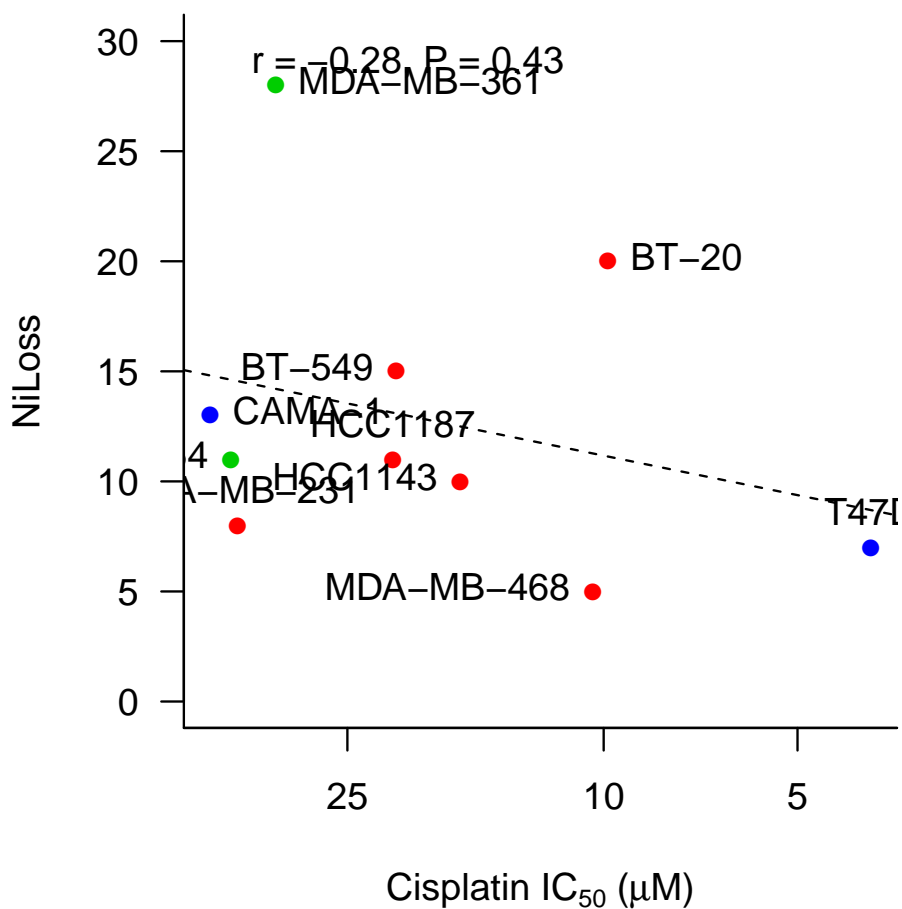

Plot supplementary figure 3E

```

> par(las = 1, cex = 1, bty = "l", pty = "s")
> plot(-log10(ic50.CL[indx.cl, 1]/1e+06), no.tel.CL[indx.cl, 3],
+      pch = 16, col = subtype.col, main = "SFig 3E", xlab = expression(paste("Cisplatin ",
+      IC[50], " (" , mu, "M)")), ylab = "NiAI", ylim = c(55,
+      200), axes = F)
> pos.vec <- c(4, 3, 3, 2, 2, 3, 3, 4, 3, 1)
> text(-log10(ic50.CL[indx.cl, 1]/1e+06), no.tel.CL[indx.cl, 3],
+      indx.cl, pos = pos.vec)
> tmp <- -log10(ic50.CL[indx.cl, 1]/1e+06)
> a <- lm(no.tel.CL[indx.cl, 3] ~ tmp)
> abline(a, lty = 2)
> a <- cor.test(no.tel.CL[indx.cl, 3], tmp, method = "spearman")
> legend("topleft", legend = paste("r = ", signif(a$estimate, 2),
+      ", P = ", signif(a$p.value, 2), sep = ""), lty = -1, pch = -1,
+      bty = "n")
> box()
> axis(2)
> axis(1, at = -log10(c(1000, 100, 50, 25, 10, 5, 1)/1e+06), tick = T,
+      line = 0, labels = c(1000, 100, 50, 25, 10, 5, 1))
> label.panel("c", xoff = 2)

```

c

SFig 3E

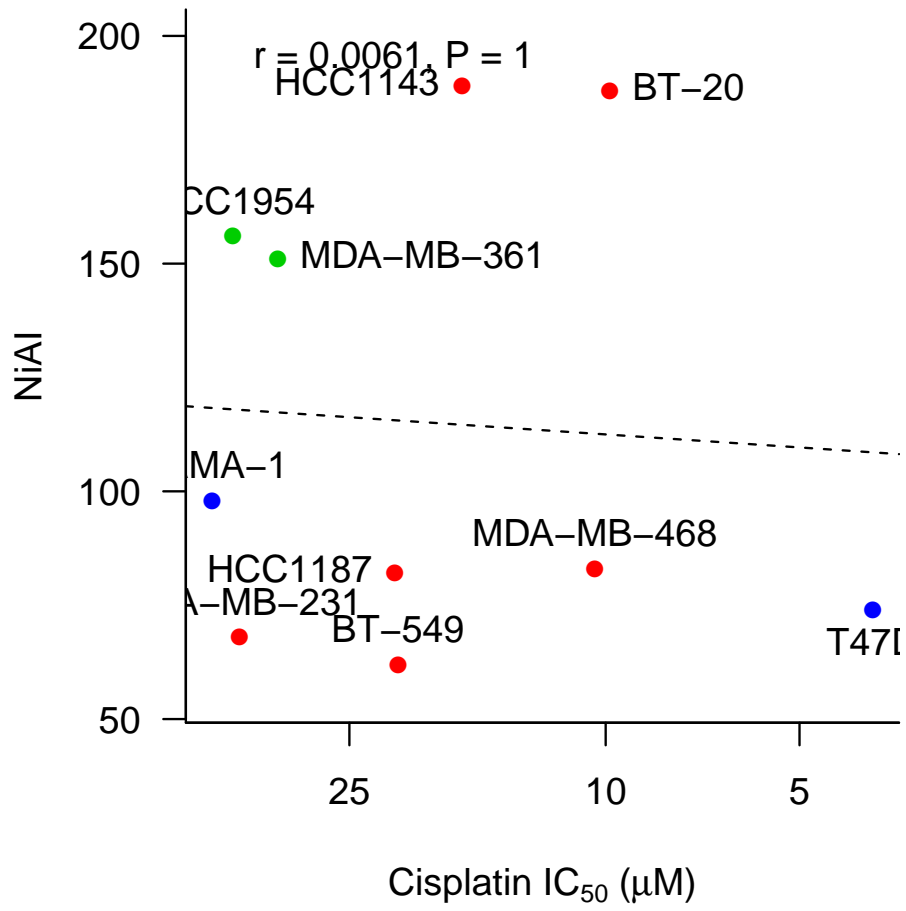

## 4 Cisplatin clinical trials

### 4.1 Contamination

Compare contamination level of Cisplatin-1 and Cisplatin-2 trial SNP data. This information is returned by ASCAT

```
> trial.contam <- cbind(c(dfci1.ascat.output$aberrantcellfraction,
+   dfci2.ascat.output$aberrantcellfraction), c(rep("DFCI1",
+   length(dfci1.ascat.output$aberrantcellfraction)), rep("DFCI2",
+   length(dfci2.ascat.output$aberrantcellfraction))))
> rownames(trial.contam) <- c(colnames(dfci1.ascat.output$nA),
+   colnames(dfci2.ascat.output$nA))
> trial.contam <- trial.contam[c(colnames(dfci1.ascat.output$nA),
+   dfci2.samples), ]

> par(las = 1, cex = 1)
> beeswarm(as.numeric(trial.contam[, 1]) ~ trial.contam[, 2], xlab = "",
+   ylab = "Aberrant Cell Fraction", main = "Normal cell contamination",
+   ylim = c(0.2, 1))
> dfci1.lowest <- sort(as.numeric(trial.contam[trial.contam[, 2] ==
+   "DFCI1", 1]))[1]
> abline(h = dfci1.lowest, lty = 2)
> legend("topleft", legend = paste("Lowest level of contamination in Cisplatin-1: ",
+   dfci1.lowest * 100, "%", sep = ""), lty = 2, bty = "n", lwd = 1)
```

### Normal cell contamination

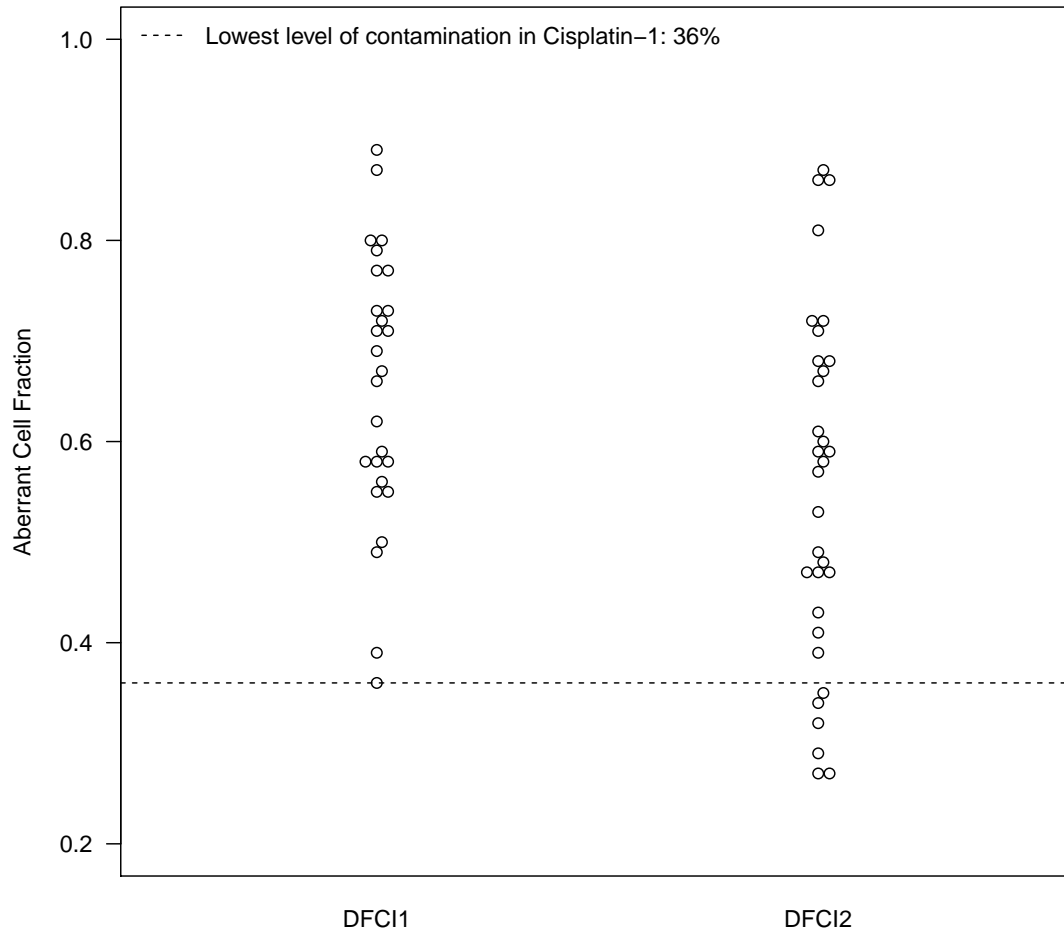

#### Make vectors of sample contamination to include

```

> dfci1.cont <- as.numeric(trial.contam[trial.contam[, 2] == "DFCI1",
+ 1])
> names(dfci1.cont) <- names(trial.contam[trial.contam[, 2] ==
+ "DFCI1", 1])
> dfci1.cont

  X1T  X3T  X4T  X5T  X6T  X7T  X8T  X9T X10T X11T X12T X13T X14T X15T X16T X17T
0.80 0.71 0.49 0.58 0.69 0.87 0.73 0.71 0.56 0.58 0.72 0.77 0.67 0.36 0.62 0.39
X18T X20T X21T X22T X23T X24T X25T X26T X27T X28T X29T
0.50 0.59 0.55 0.79 0.89 0.66 0.73 0.58 0.77 0.55 0.80

> dfci2.cont <- as.numeric(trial.contam[trial.contam[, 2] == "DFCI2",
+ 1])
> names(dfci2.cont) <- names(trial.contam[trial.contam[, 2] ==
+ "DFCI2", 1])
> dfci2.cont

```

|      |      |      |      |      |      |      |      |      |      |      |      |      |      |      |      |
|------|------|------|------|------|------|------|------|------|------|------|------|------|------|------|------|
| P3   | P4   | P5   | P6   | P7   | P9   | P10  | P13  | P14  | P15  | P17  | P18  | P20  | P21  | P24  | P26  |
| 0.59 | 0.41 | 0.53 | 0.71 | 0.57 | 0.72 | 0.29 | 0.68 | 0.34 | 0.81 | 0.86 | 0.72 | 0.39 | 0.86 | 0.47 | 0.32 |
| P27  | P28  | P29  | P32  | P34  | P35  | P37  | P39  | P40  | P41  | P46  | P48  | P49  | P51  | P45L | P45R |
| 0.49 | 0.68 | 0.66 | 0.47 | 0.60 | 0.59 | 0.67 | 0.43 | 0.48 | 0.47 | 0.87 | 0.61 | 0.35 | 0.27 | 0.58 | 0.27 |

Make a contamination cut-off based on the lowest level of contamination found in the Cisplatin-1 trial

```
> cont.max <- sort(dfci1.cont)[1]
> cont.max
```

```
X15T
0.36
```

## 4.2 Figure 2, Cisplatin-1

Make a binary response vector for Cisplatin-1, based on at least 90% response rates (Miller-Payne 4 and 5)

```
> dfci1.mpbins <- c(0, 1)[match(dfci1.mpgrade >= 4, c("FALSE", "TRUE"))]
> names(dfci1.mpbins) <- names(dfci1.mpgrade)
> dfci1.mpbins
```

|     |     |     |     |     |     |     |    |     |     |     |     |     |     |     |     |     |     |     |     |
|-----|-----|-----|-----|-----|-----|-----|----|-----|-----|-----|-----|-----|-----|-----|-----|-----|-----|-----|-----|
| P1  | P3  | P4  | P5  | P6  | P7  | P8  | P9 | P10 | P11 | P12 | P13 | P14 | P15 | P16 | P17 | P18 | P20 | P21 | P22 |
| 0   | 1   | 0   | 1   | 0   | 1   | 1   | 1  | 1   | 0   | 0   | 0   | 0   | 0   | 0   | 1   | 1   | 0   | 0   | 0   |
| P23 | P24 | P25 | P26 | P27 | P28 | P29 |    |     |     |     |     |     |     |     |     |     |     |     |     |
| 0   | 0   | 0   | 0   | 0   | 0   | 1   |    |     |     |     |     |     |     |     |     |     |     |     |     |

Plot figure 2a

```
> boxplot(no.tel.dfci1[dfci1.cont >= cont.max, 1] ~ dfci1.mpbins[dfci1.cont >=
+   cont.max], ylab = "NtAI", xlab = "", notch = F, names = c("No response",
+   "Response"), main = "Figure 2a", ylim = c(0, 35))
> beeswarm(no.tel.dfci1[dfci1.cont >= cont.max, 1] ~ dfci1.mpbins[dfci1.cont >=
+   cont.max], col = c(1, 2), add = T, method = "center", pwpch = c(16,
+   17)[match(dfci1.brca[dfci1.cont >= cont.max], c(0, 1))])
> legend("topleft", legend = paste("P =", signif(wilcox.test(no.tel.dfci1[dfci1.cont >=
+   cont.max, 1] ~ dfci1.mpbins[dfci1.cont >= cont.max])$p.value,
+   3)), bty = "n", pch = -1)
```



Figure 2a

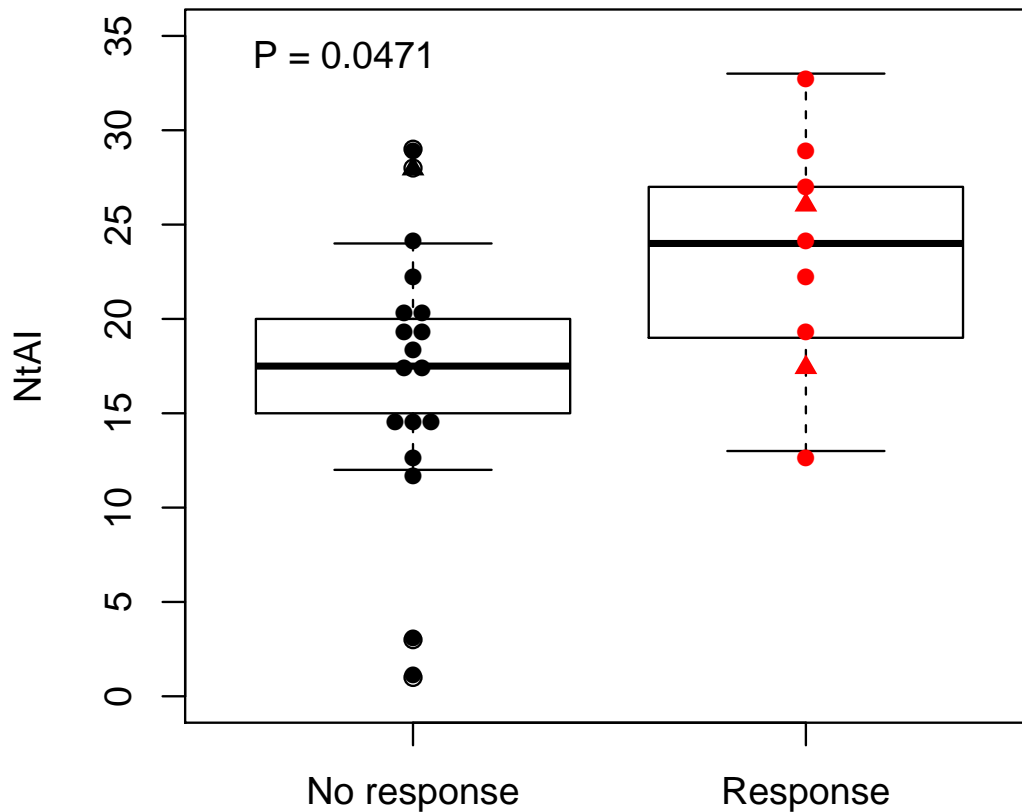

Calculate the ROC curve for figure 2b, and identify the optimum number of NtAI for separation between responders on non-responder.

Then determine the area under the curve and the p-value for association between sensitivity to cisplatin and high numbers of NtAI.

```
> R1 <- rocdemo.sca(dfci1.mpbins[dfci1.cont >= cont.max], no.tel.dfci1[dfci1.cont >=
+   cont.max, 1])
> cut.indx <- which(sqrt((1 - R1@sens)^2 + (1 - R1@spec)^2) ==
+   min(sqrt((1 - R1@sens)^2 + (1 - R1@spec)^2)))
> optimum.cut <- R1@cuts[cut.indx]
> optimum.cut

[1] 21.5

> AUC(R1)

[1] 0.7407407

> wilcox.test(no.tel.dfci1[dfci1.cont >= cont.max, 1] ~ dfci1.mpbins[dfci1.cont >=
+   cont.max])
```

Wilcoxon rank sum test with continuity correction

```
data: no.tel.dfc11[dfci1.cont >= cont.max, 1] by dfci1.mpbin[dfci1.cont >= cont.max]
W = 42, p-value = 0.0471
alternative hypothesis: true location shift is not equal to 0
```

Plot figure 2b

```
> plot(R1, ylab = "Sensitivity", xlab = "1-specificity", lty = 1,
+      col = 1, main = "Figure 2b", lwd = 2)
> lines(c(0, 1), c(0, 1), lty = 2)
> legend("bottomright", legend = paste("AUC = ", signif(AUC(R1),
+      2), sep = ""), pch = c(-1), col = c(-1))
```

**Figure 2b**

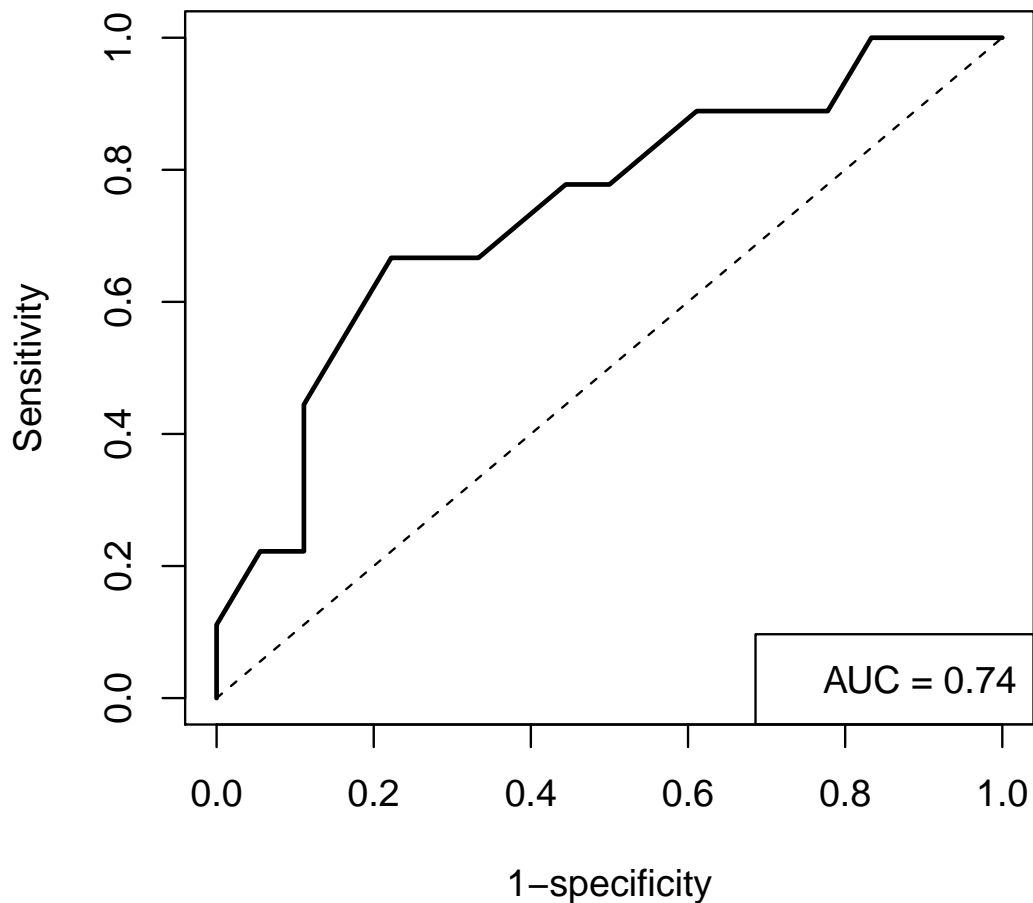

Calculate AUC confidence intervals for figure 2B

```
> ci.auc.cis1 <- ci.auc(no.tel.dfc11[dfci1.cont >= cont.max, 1],
+      dfci1.mpbin[dfci1.cont >= cont.max])
> ci.auc.cis1
```

| Low       | High      |
|-----------|-----------|
| 0.5027807 | 0.9006955 |

### 4.3 Figure 2, Cisplatin-2

Tables of false/true positives/negatives for both trials based on the optimum cut-off for Cisplatin-1.

This is used to make table of ACC, PPV, NPV, SENS, SPEC values.

```
> acc.table.1 <- table(no.tel.dfci1[dfci1.cont >= cont.max, 1] >=
+ optimum.cut, dfci1.mpgrade[dfci1.cont >= cont.max] >= 4)
> acc.table.1
```

|       | FALSE | TRUE |
|-------|-------|------|
| FALSE | 14    | 3    |
| TRUE  | 4     | 6    |

```
> acc.table.2 <- table(no.tel.dfci2[dfci2.cont >= cont.max, 1] >=
+ optimum.cut, dfci2.mpgrade[dfci2.cont >= cont.max] >= 4)
> acc.table.2
```

|       | FALSE | TRUE |
|-------|-------|------|
| FALSE | 10    | 0    |
| TRUE  | 7     | 9    |

```
> table1 <- matrix(NA, nrow = 7, ncol = 2)
> colnames(table1) <- c("Cisplatin-1", "Cisplatin-2")
> rownames(table1) <- c("ACC", "PPV", "SENS", "NPV", "SPEC", "OR",
+ "P")
> table1[1, 1] <- signif((acc.table.1[2, 2] + acc.table.1[1, 1])/(sum(acc.table.1)),
+ 2)
> table1[1, 2] <- signif((acc.table.2[2, 2] + acc.table.2[1, 1])/(sum(acc.table.2)),
+ 2)
> table1[2, 1] <- signif((acc.table.1[2, 2])/(acc.table.1[2, 2] +
+ acc.table.1[2, 1]), 2)
> table1[2, 2] <- signif((acc.table.2[2, 2])/(acc.table.2[2, 2] +
+ acc.table.2[2, 1]), 2)
> table1[3, 1] <- signif((acc.table.1[2, 2])/(acc.table.1[2, 2] +
+ acc.table.1[1, 2]), 2)
> table1[3, 2] <- signif((acc.table.2[2, 2])/(acc.table.2[2, 2] +
+ acc.table.2[1, 2]), 2)
> table1[4, 1] <- signif((acc.table.1[1, 1])/(acc.table.1[1, 1] +
+ acc.table.1[1, 2]), 2)
> table1[4, 2] <- signif((acc.table.2[1, 1])/(acc.table.2[1, 1] +
+ acc.table.2[1, 2]), 2)
> table1[5, 1] <- signif((acc.table.1[1, 1])/(acc.table.1[1, 1] +
+ acc.table.1[2, 1]), 2)
> table1[5, 2] <- signif((acc.table.2[1, 1])/(acc.table.2[1, 1] +
+ acc.table.2[2, 1]), 2)
> table1[6, 1] <- paste(signif(fisher.test(acc.table.1)$estimate,
+ 2), " [", signif(fisher.test(acc.table.1)$conf.int[1], 2),
+ "-", signif(fisher.test(acc.table.1)$conf.int[2], 2), "]",
+ sep = "")
> table1[6, 2] <- paste(signif(fisher.test(acc.table.2)$estimate,
+ 2), " [", signif(fisher.test(acc.table.2)$conf.int[1], 2),
+ "-", signif(fisher.test(acc.table.2)$conf.int[2], 2), "]",
+ sep = "")
> table1[7, 1] <- signif(fisher.test(acc.table.1)$p.value, 2)
```

```
> table1[7, 2] <- signif(fisher.test(acc.table.2)$p.value, 2)
> table1
```

|      | Cisplatin-1    | Cisplatin-2     |
|------|----------------|-----------------|
| ACC  | "0.74"         | "0.73"          |
| PPV  | "0.6"          | "0.56"          |
| SENS | "0.67"         | "1"             |
| NPV  | "0.82"         | "1"             |
| SPEC | "0.78"         | "0.59"          |
| OR   | "6.4 [0.9-60]" | "Inf [1.9-Inf]" |
| P    | "0.039"        | "0.0039"        |

Make a binary response vector for Cisplatin-2, based on at least 90% response rates (Miller-Payne 4 and 5)

```
> dfci2.mpbin <- c(0, 1)[match(dfci2.mpgrade >= 4, c("FALSE", "TRUE"))]
> names(dfci2.mpbin) <- names(dfci2.mpgrade)
> dfci2.mpbin
```

| P3  | P4  | P5  | P6  | P7  | P9  | P10 | P13 | P14 | P15 | P17 | P18 | P20 | P21 | P24  | P26  |
|-----|-----|-----|-----|-----|-----|-----|-----|-----|-----|-----|-----|-----|-----|------|------|
| 1   | 0   | 0   | 1   | 1   | 0   | 0   | 0   | 0   | 1   | 1   | 0   | 0   | 0   | 0    | 1    |
| P27 | P28 | P29 | P32 | P34 | P35 | P37 | P39 | P40 | P41 | P46 | P48 | P49 | P51 | P45L | P45R |
| 1   | 0   | 0   | 0   | 0   | 0   | 0   | 0   | 1   | 1   | 0   | 1   | 0   | 1   | 0    | 1    |

Plot figure 2c

```
> boxplot(no.tel.dfci2[dfci2.cont >= cont.max, 1] ~ dfci2.mpbin[dfci2.cont >=
+   cont.max], ylab = "NtAI", xlab = "Response", notch = F, names = c("No",
+   "Yes"), main = "Figure 2c", ylim = c(0, 35))
> beeswarm(no.tel.dfci2[dfci2.cont >= cont.max, 1] ~ dfci2.mpbin[dfci2.cont >=
+   cont.max], col = c(1, 2), add = T, method = "center", pwpch = c(16,
+   17)[match(dfci2.brca[dfci2.cont >= cont.max], c(0, 1))])
> legend("bottomright", legend = paste("P =", signif(wilcox.test(no.tel.dfci2[dfci2.cont >=
+   cont.max, 1] ~ dfci2.mpbin[dfci2.cont >= cont.max])$p.value,
+   4)), bty = "n", pch = -1)
```

Figure 2c

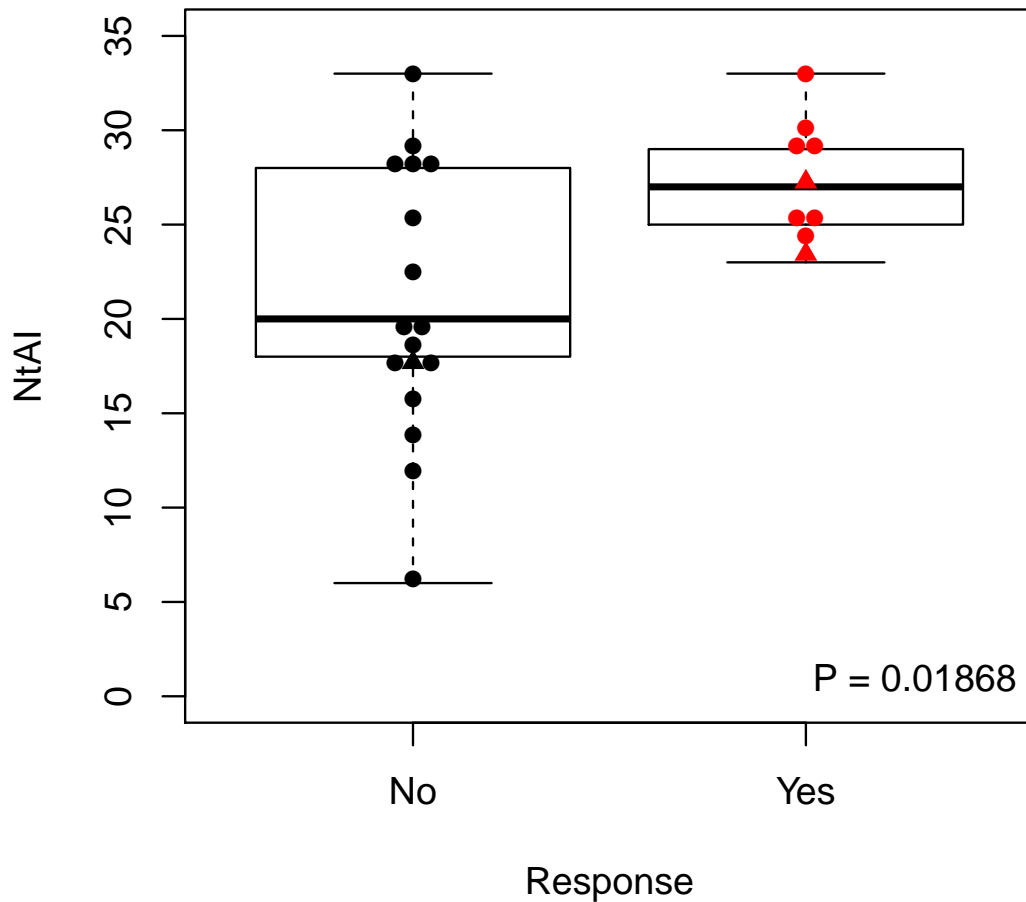

Calculate the ROC curve for figure 2f and determine the area under the curve and the p-value for association between sensitivity to cisplatin and high numbers of NtAI.

```
> R2 <- rocdemo.sca(dfci2.mpbins[dfci2.cont >= cont.max], no.tel.dfci2[dfci2.cont >=
+   cont.max, 1])
> AUC(R2)
```

```
[1] 0.7875817
```

```
> wilcox.test(no.tel.dfci2[dfci2.cont >= cont.max, 1] ~ dfci2.mpbins[dfci2.cont >=
+   cont.max])
```

Wilcoxon rank sum test with continuity correction

```
data: no.tel.dfci2[dfci2.cont >= cont.max, 1] by dfci2.mpbins[dfci2.cont >= cont.max]
W = 32.5, p-value = 0.01868
alternative hypothesis: true location shift is not equal to 0
```

Plot figure 2d

```

> plot(R2, ylab = "Sensitivity", xlab = "1-specificity", lty = 1,
+      col = 1, main = "Figure 2d", lwd = 2)
> lines(c(0, 1), c(0, 1), lty = 2)
> legend("bottomright", legend = c(paste("AUC = ", signif(AUC(R2),
+      2), sep = "")), pch = c(-1), col = c(-1))

```

**Figure 2d**

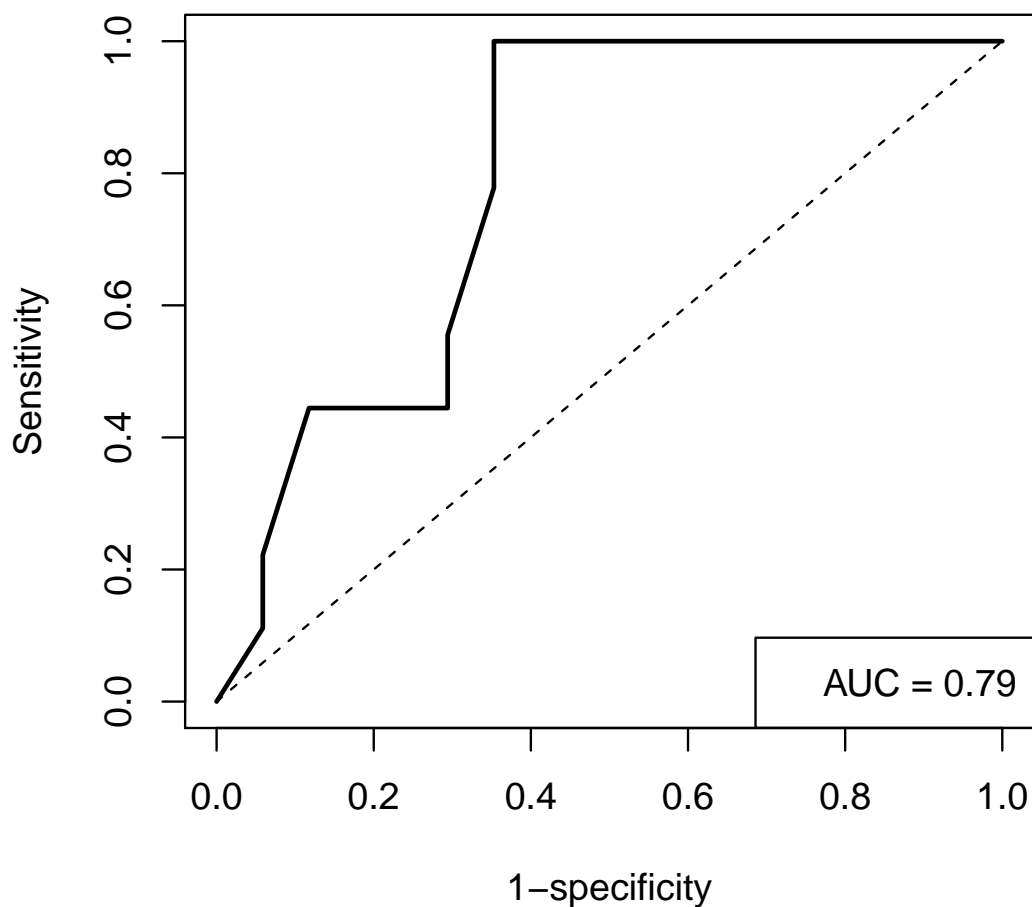

Calculate AUC confidence intervals for figure 2D

```

> ci.auc.cis2 <- ci.auc(no.tel.dfci2[dfci2.cont >= cont.max, 1],
+   dfci2.mpbins[dfci2.cont >= cont.max])
> ci.auc.cis2

```

```

      Low      High
0.5541667 0.9270833

```

## 5 TCGA ovarian

### 5.1 Figure 3

Prepare the data by organizing the samples into 5 groups: mutated BRCA1 resistant, wtBRCA1/2 resistant, wtBRCA1/2 sensitive, mutated BRCA2 sensitive, mutated BRCA1 sensitive. There are no resistant mutated BRCA2. One sample has both a BRCA1 and BRCA2 mutation, this sample is placed in both groups. These 5 groups will be named 1-5, so that we can plot them in this order

```
> tcga.ov.subset.vec <- intersect(names(tcga.ovarian.outcome[tcga.ovarian.outcome !=
+ "null" & tcga.ovarian.platinum.drug & tcga_ovarian_ascat_aberrant >=
+ cont.max]), rownames(tcga.ov.brca.mut))
> tcga.ov.wtbrca <- name.vect(tcga.ov.brca.mut[tcga.ov.subset.vec,
+ 1] == "" & tcga.ov.brca.mut[tcga.ov.subset.vec, 2] %in% c("",
+ "AMP;"), rownames(tcga.ov.brca.mut[tcga.ov.subset.vec, ]))
> tcga.ov.brca1 <- name.vect(tcga.ov.brca.mut[tcga.ov.subset.vec,
+ 1] == "", rownames(tcga.ov.brca.mut[tcga.ov.subset.vec, ]))
> tcga.ov.brca2 <- name.vect(tcga.ov.brca.mut[tcga.ov.subset.vec,
+ 2] %in% c("", "AMP;"), rownames(tcga.ov.brca.mut[tcga.ov.subset.vec,
+ ]))
> tcga.ov.brca.sens.stat <- tcga.ov.wtbrca
> tcga.ov.brca.sens.stat[tcga.ov.outcome.180[tcga.ov.subset.vec] &
+ tcga.ov.wtbrca] <- 3
> tcga.ov.brca.sens.stat[!tcga.ov.outcome.180[tcga.ov.subset.vec] &
+ tcga.ov.wtbrca] <- 2
> tcga.ov.brca.sens.stat[tcga.ov.outcome.180[tcga.ov.subset.vec] &
+ !tcga.ov.brca1] <- 5
> tcga.ov.brca.sens.stat[!tcga.ov.outcome.180[tcga.ov.subset.vec] &
+ !tcga.ov.brca1] <- 1
> tcga.ov.brca.sens.stat[tcga.ov.outcome.180[tcga.ov.subset.vec] &
+ !tcga.ov.brca2] <- 4
> tcga.ov.brca.sens.stat[!tcga.ov.brca2 & !tcga.ov.brca1] <- 6
> tcga.ov.brca.sens.stat <- c(tcga.ov.brca.sens.stat, tcga.ov.brca.sens.stat[tcga.ov.brca.sens.stat
+ 6])
> tcga.ov.brca.sens.stat[tcga.ov.brca.sens.stat %in% 6] <- c(4,
+ 5)
> table(tcga.ov.brca.sens.stat)
```

```
tcga.ov.brca.sens.stat
  1  2  3  4  5
  5 26 139 26 23
```

#### Plot figure 3

```
> par(las = 1, cex = 1, bty = "l", mar = c(4, 4, 2, 2) + 0.1)
> boxplot(no.tel.tcga[names(tcga.ov.brca.sens.stat), 1] ~ tcga.ov.brca.sens.stat,
+ ylab = expression(N[tAI]), xlab = "", notch = F, main = "TCGA ovarian",
+ pch = 16, ylim = c(-7, 37), outline = F, names = c("Res,mutBRCA1",
+ "Res,wtBRCA", "Sens,wtBRCA", "Sens,mutBRCA2", "Sens,mutBRCA1"))
> beeswarm(no.tel.tcga[names(tcga.ov.brca.sens.stat), 1] ~ tcga.ov.brca.sens.stat,
+ col = c(1, 1, 2, 2, 2), add = T, pch = c(2, 1, 1, 2, 2),
+ method = "hex", cex = 0.8)
> legend("bottomleft", legend = c(paste("P,RESmutBRCA1-RESwtBRCA =",
+ signif(wilcox.test(no.tel.tcga[names(tcga.ov.brca.sens.stat),
```



```

+     1] ~ tcga.ov.brca.sens.stat, subset = tcga.ov.brca.sens.stat %in%
+     c(1, 2))$p.value, 3)), paste("P,RESmutBRCA1-SENSmutBRCA1 =",
+   signif(wilcox.test(no.tel.tcga[names(tcga.ov.brca.sens.stat),
+     1] ~ tcga.ov.brca.sens.stat, subset = tcga.ov.brca.sens.stat %in%
+     c(1, 5))$p.value, 3)), paste("P,RESmutBRCA1-SENSmutBRCA2 =",
+   signif(wilcox.test(no.tel.tcga[names(tcga.ov.brca.sens.stat),
+     1] ~ tcga.ov.brca.sens.stat, subset = tcga.ov.brca.sens.stat %in%
+     c(1, 4))$p.value, 3)), paste("P,RESmutBRCA1-SENSwtBRCA =",
+   signif(wilcox.test(no.tel.tcga[names(tcga.ov.brca.sens.stat),
+     1] ~ tcga.ov.brca.sens.stat, subset = tcga.ov.brca.sens.stat %in%
+     c(1, 3))$p.value, 3)), paste("P,RESwtBRCA-SENSmutBRCA1 =",
+   signif(wilcox.test(no.tel.tcga[names(tcga.ov.brca.sens.stat),
+     1] ~ tcga.ov.brca.sens.stat, subset = tcga.ov.brca.sens.stat %in%
+     c(2, 5))$p.value, 3))), bty = "n", pch = c(-1), col = c(-1))
> legend("bottomright", legend = c(paste("P,RESwtBRCA-SENSmutBRCA2 =",
+   signif(wilcox.test(no.tel.tcga[names(tcga.ov.brca.sens.stat),
+     1] ~ tcga.ov.brca.sens.stat, subset = tcga.ov.brca.sens.stat %in%
+     c(2, 4))$p.value, 3)), paste("P,RESwtBRCA-SENSwtBRCA =",
+   signif(wilcox.test(no.tel.tcga[names(tcga.ov.brca.sens.stat),
+     1] ~ tcga.ov.brca.sens.stat, subset = tcga.ov.brca.sens.stat %in%
+     c(2, 3))$p.value, 3)), paste("P,SENSmutBRCA1-SENSmutBRCA2 =",
+   signif(wilcox.test(no.tel.tcga[names(tcga.ov.brca.sens.stat),
+     1] ~ tcga.ov.brca.sens.stat, subset = tcga.ov.brca.sens.stat %in%
+     c(5, 4))$p.value, 3)), paste("P,SENSmutBRCA1-SENSwtBRCA =",
+   signif(wilcox.test(no.tel.tcga[names(tcga.ov.brca.sens.stat),
+     1] ~ tcga.ov.brca.sens.stat, subset = tcga.ov.brca.sens.stat %in%
+     c(5, 3))$p.value, 3)), paste("P,SENSmutBRCA2-SENSwtBRCA =",
+   signif(wilcox.test(no.tel.tcga[names(tcga.ov.brca.sens.stat),
+     1] ~ tcga.ov.brca.sens.stat, subset = tcga.ov.brca.sens.stat %in%
+     c(4, 3))$p.value, 3))), bty = "n", pch = c(-1), col = c(-1))

```

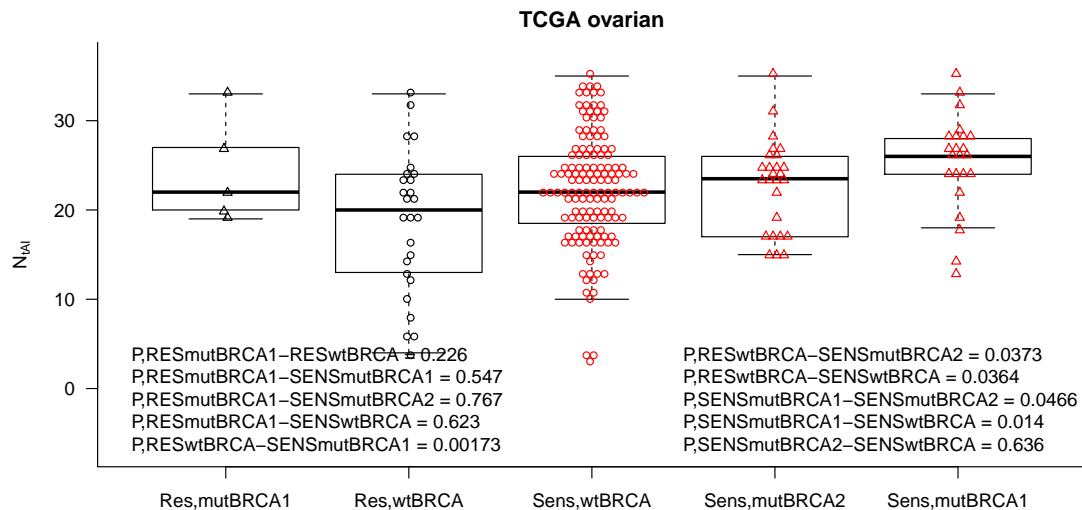

## 5.2 Supplementary figure 4

Calculate the ROC curve for supplementary figure 4.

Then determine the area under the curve and the p-value for association between sensitivity to cisplatin and high numbers of NtAI in the wtBRCA samples.

```
> R3 <- rocdemo.sca(c(0, 1)[match(tcga.ov.outcome.180[names(tcga.ov.brca.sens.stat[tcga.ov.brca.sens.stat %in%
+   c(2, 3)])], c("FALSE", "TRUE"))], no.tel.tcga[names(tcga.ov.brca.sens.stat[tcga.ov.brca.sens.stat %in%
+   c(2, 3)]), 1])
> AUC(R3)
```

```
[1] 0.6293581
```

```
> wilcox.test(no.tel.tcga[names(tcga.ov.brca.sens.stat[tcga.ov.brca.sens.stat %in%
+   c(2, 3)]), 1] ~ tcga.ov.outcome.180[names(tcga.ov.brca.sens.stat[tcga.ov.brca.sens.stat %in%
+   c(2, 3)])])
```

Wilcoxon rank sum test with continuity correction

```
data: no.tel.tcga[names(tcga.ov.brca.sens.stat[tcga.ov.brca.sens.stat %in% c(2, 3)]), 1] by tcga.ov.outcome.180[names(tcga.ov.brca.sens.stat[tcga.ov.brca.sens.stat %in% c(2, 3)])]
W = 1339.5, p-value = 0.03644
alternative hypothesis: true location shift is not equal to 0
```

Plot supplementary figure 4

```
> plot(R3, ylab = "Sensitivity", xlab = "1-specificity", lty = 1,
+   col = 1, main = "SFig 4", lwd = 2)
> lines(c(0, 1), c(0, 1), lty = 2)
> legend("bottomright", legend = paste("AUC = ", signif(AUC(R3),
+   2), sep = ""), pch = c(-1), col = c(-1))
```

SFig 4

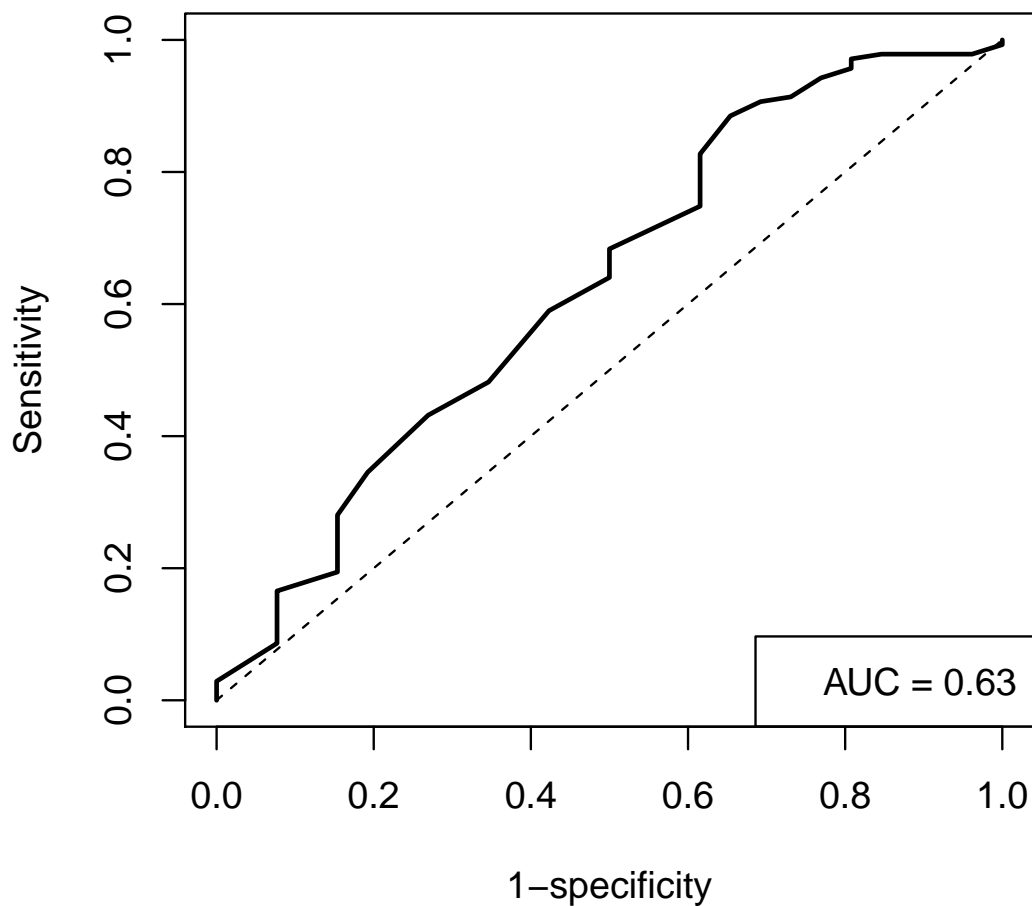

Calculate AUC confidence intervals for supplementary figure 4

```
> ci.auc.tcga <- ci.auc(no.tel.tcga[names(tcga.ov.brca.sens.stat[tcga.ov.brca.sens.stat %in%
+   c(2, 3])], 1], c(0, 1)[match(tcga.ov.outcome.180[names(tcga.ov.brca.sens.stat[tcga.ov.brca.
+   c(2, 3])], c("FALSE", "TRUE"))])
> ci.auc.tcga

      Low      High
0.5004431 0.7600515
```

## 6 NtAI breakpoints

### 6.1 NtAI breakpoint location

Organize data

```
> dfci1.telAI.seg <- telAI.fn(dfci1.ascats.seg, chrominfo = chrominfo,
+   min.probes = min.probes.cis1)
> dfci2.telAI.seg <- telAI.fn(dfci2.ascats.seg, chrominfo = chrominfo,
+   min.probes = min.probes.cis2)
> dfci1.names <- dfci1.mpgrade[dfci1.cont >= cont.max]
> names(dfci1.names) <- names(dfci1.cont[dfci1.cont >= cont.max])
> dfci2.names <- dfci2.mpgrade[dfci2.cont >= cont.max]
> names(dfci2.names) <- names(dfci2.cont[dfci2.cont >= cont.max])
> comb.tel.seg <- rbind(dfci1.telAI.seg, dfci2.telAI.seg)
> comb.tel.seg <- comb.tel.seg[comb.tel.seg[, 1] %in% names(c(dfci1.names,
+   dfci2.names)), ]
> telAI.breaks <- matrix(0, 0, 4)
> for (i in 1:nrow(comb.tel.seg)) {
+   a <- c(2, 4)[match(comb.tel.seg[i, 1] %in% names(dfci1.names),
+     c("TRUE", "FALSE"))]
+   b <- c(0, 2)[match(comb.tel.seg[i, 1] %in% names(c(dfci1.names,
+     dfci2.names)[c(dfci1.names, dfci2.names) %in% c(4:5)]),
+     c("FALSE", "TRUE"))]
+   telAI.breaks <- rbind(telAI.breaks, c(as.numeric(comb.tel.seg[i,
+     2]), NA, a, b))
+   if (as.numeric(comb.tel.seg[i, 3]) < chrominfo[as.numeric(comb.tel.seg[i,
+     2]), 3] * 1000) {
+     telAI.breaks[i, 2] <- as.numeric(comb.tel.seg[i, 4])
+   }
+   if (as.numeric(comb.tel.seg[i, 3]) > chrominfo[as.numeric(comb.tel.seg[i,
+     2]), 3] * 1000) {
+     telAI.breaks[i, 2] <- as.numeric(comb.tel.seg[i, 3])
+   }
+ }
> CHR <- telAI.breaks[, 1]
> CHR[CHR == 23] <- "X"
> MapInfo <- telAI.breaks[, 2]
> rownames(telAI.breaks) <- 1:nrow(telAI.breaks)
```

## 6.2 Supplementary figure 5

### Plot supplementary figure 5

```
> par(las = 1)
> chrompos <- prepareGenomePlot(data.frame(CHR, MapInfo), paintCytobands = TRUE,
+   organism = "hsa", sexChromosomes = T)
> a <- beeswarm(chrompos[, 2] ~ chrompos[, 1], horizontal = T,
+   vertical = F, do.plot = F, method = "square", pch = 22, pwbg = telAI.breaks[,
+   4], add = T, cex = 0.4)
> a <- apply(a, 2, as.numeric)
> rownames(a) <- 1:nrow(a)
> bb <- sort(as.numeric(names(table(as.numeric(a[, 1]) - as.numeric(a[,
+   6])))))
> bb <- bb[bb > 0][1]
> a[, 1] <- a[, 1] + bb
> for (i in unique(a[, 6])) {
+   b <- a[a[, 6] == i, ]
+   if (nrow(b[b[, 1] <= b[, 6], , drop = F]) > 0) {
+     tmp <- b[as.numeric(b[, 1]) <= as.numeric(b[, 6]), ,
+     drop = F]
+     tmp <- tmp[order(abs(as.numeric(tmp[, 1]) - as.numeric(tmp[,
+     6])), decreasing = T), , drop = F]
+     tmp <- tmp[!duplicated(tmp[, 2]), , drop = F]
+     for (k in 1:nrow(tmp)) {
+       ab <- as.numeric(tmp[k, 6]) - as.numeric(tmp[k, 1])
+       b[b[, 2] %in% tmp[k, 2], 1] <- b[b[, 2] %in% tmp[k,
+       2], 1] + ab + bb
+     }
+     a[rownames(b), 1] <- b[, 1]
+   }
+ }
> points(a[, 2], a[, 1], cex = 0.4, pch = 22, bg = a[, 5])
> label.panel("A", xoff = 2)
> legend("top", legend = c("Resistant", "Sensitive"), col = 1,
+   pch = 22, pt.bg = c(0, 2))
```

A

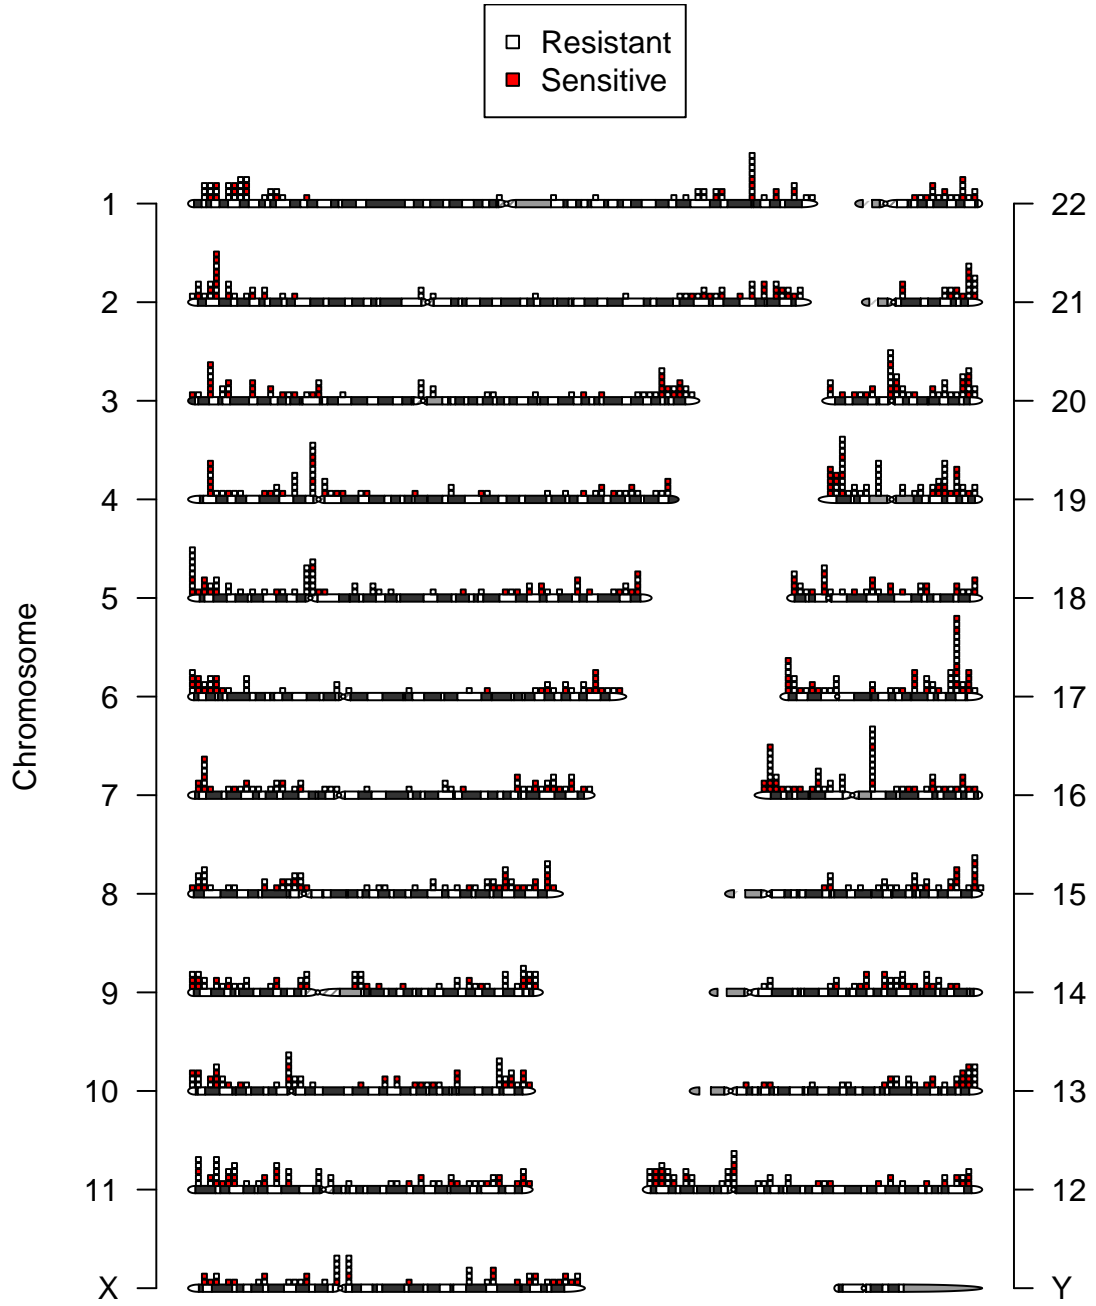

### 6.3 NtAI breakpoints associated with CNVs

Prepare to make figures 4a-b

Load location data on common CNVs.

Data on common CNVs has been acquired from the Database of Genomic Variants.

Cisplatin-1 mapping is based on build 17 of the human genome, while cisplatin-2 is based on build 18.

Load and organize data

```
> tmp <- read.table("DGV/variation.hg18.v10.nov.2010.txt", sep = "\t",
+ as.is = T, header = T)
> tmp <- tmp[tmp[, 6] == "CopyNumber", ]
> tmp <- tmp[, c(3:5)]
> tmp[, 1] <- sub("chr", "", tmp[, 1])
> tmp[tmp[, 1] %in% "X", 1] <- 23
> tmp <- tmp[tmp[, 1] %in% c(1:23), ]
> commonCNV.18 <- apply(tmp, 2, as.numeric)
> tmp <- read.table("DGV/variation.hg17.v10.nov.2010.txt", sep = "\t",
+ as.is = T, header = T)
> tmp <- tmp[tmp[, 6] == "CopyNumber", ]
> tmp <- tmp[, c(3:5)]
> tmp[, 1] <- sub("chr", "", tmp[, 1])
> tmp[tmp[, 1] %in% "X", 1] <- 23
> tmp <- tmp[tmp[, 1] %in% c(1:23), ]
> commonCNV.17 <- apply(tmp, 2, as.numeric)
```

Determine the number of NtAIs associated with CNVs within 25 kb at either side, in all samples

```
> window.size <- 25000
> CNV.cis1.breaks <- telBreak.CNV.fn(dfci1.telAI.seg[dfci1.telAI.seg[,
+ 1] %in% names(dfci1.names), ], commonCNV.17, window.size = window.size)
> CNV.cis1.breaks
```

| Associated with | Total |
|-----------------|-------|
| 255             | 517   |

```
> CNV.cis2.breaks <- telBreak.CNV.fn(dfci2.telAI.seg[dfci2.telAI.seg[,
+ 1] %in% names(dfci2.names), ], commonCNV.18, window.size = window.size)
> CNV.cis2.breaks
```

| Associated with | Total |
|-----------------|-------|
| 340             | 599   |

To test if the breakpoints are significantly associated with CNVs, permutations must be performed where the location of the breakpoints are randomly shuffled, and then tested for association with CNVs

Probe location is based on the SNP chips, and can be obtained from the GEO, either from the data we uploaded (GSE28330), or from the OncoScan platform entry. When picking random breakpoints, it is important to restrict the analysis to actual SNP probe locations, as these are the only possible breakpoints in the real data.

Load probe locations

```
> cis2mark <- read.table("MIPCNReference/mip_cn_330K_markers.txt",
+ header = T, as.is = T, row.names = 1, sep = "\t")
> cis2mark[, 4] <- sub("chr", "", cis2mark[, 4])
```

```

> cis2mark[cis2mark[, 4] == "X", 4] <- 23
> cis2mark <- cis2mark[!cis2mark[, 4] == "Y", ]
> cis2mark <- cis2mark[!cis2mark[, 2] == cis2mark[, 3], ]
> cis2mark <- apply(cis2mark[, 4:5], 2, as.numeric)
> cis1mark <- read.table("MIPCNReference/mip1.markers.txt", header = T,
+   as.is = T, row.names = 1, sep = "\t")
> cis1mark[cis1mark[, 3] == "X", 3] <- 23
> cis1mark <- apply(cis1mark[, c(3:4)], 2, as.numeric)
> cis1mark <- cis1mark[order(cis1mark[, 2]), ]
> cis1mark <- cis1mark[order(cis1mark[, 1]), ]
> head(cis1mark)

```

```

      Chrom. Chrom..Position
[1,]      1      2201241
[2,]      1      2779554
[3,]      1      2905810
[4,]      1      3097040
[5,]      1      3117988
[6,]      1      3128433

```

```

> head(cis2mark)

```

```

      Chrom Chrom.Pos..bp.
[1,]      1      524446
[2,]      1      744055
[3,]      1      788822
[4,]      1     1038818
[5,]      1     1148140
[6,]      1     1211299

```

#### A function to perform the permutations

```

> perm.fn <- function(data.type, window.size, probe.location, no.breaks = 1000,
+   no.perm = 1000) {
+   output <- list()
+   for (j in 1:no.perm) {
+     cat(j)
+     tmp1 <- probe.location[sample(1:nrow(probe.location),
+       no.breaks, replace = T), ]
+     tmp2 <- vector()
+     for (i in 1:no.breaks) {
+       tmp <- data.type[data.type[, 1] == tmp1[i, 1], ,
+         drop = F]
+       a <- c(tmp1[i, 2] - window.size, tmp1[i, 2] + window.size)
+       tmp <- tmp[tmp[, 3] >= a[1], , drop = F]
+       tmp <- tmp[tmp[, 2] <= a[2], , drop = F]
+       tmp2[i] <- nrow(tmp)
+     }
+     output[[j]] <- tmp2
+   }
+   return(output)
+ }

```



**Now do permutations to test for significance.**

**This step takes a very long time, and has therefore been performed separately, and is now loaded as an R object.**

**For clarity, the code used to perform permutations is shown below.**

```
perm.cnv.cis1.all <- perm.fn(commonCNV.17, window.size=window.size, probe.location=cis1mark,  
no.perm=1000, no.breaks=CNV.cis1.breaks[2])
```

```
perm.cnv.cis2.all <- perm.fn(commonCNV.18, window.size=window.size, probe.location=cis2mark,  
no.perm=1000, no.breaks=CNV.cis2.breaks[2])
```

```
perm.list.36cont.20111020 <- list(perm.cnv.cis1.all, perm.cnv.cis2.all)
```

```
names(perm.list.36cont.20111020) <- c("perm.cnv.cis1.all", "perm.cnv.cis2.all")
```

```
save(perm.list.36cont.20111020, file="perm.list.36cont.20111020.RData")
```

**Load object containing permuted data**

```
> load("perm.list.36cont.20111020.RData")
```

## 6.4 Figure 4

Plot figure 4a

```
> par(las = 1)
> tmp <- sapply(perm.list.36cont.20111020$perm.cnv.cis1.all, function(x) {
+   length(x[x != 0])
+ })
> P1 <- length(tmp[tmp >= CNV.cis1.breaks[1]])/1001
> plot(density(tmp), xlim = c(150, 260), ylim = c(0, 0.05), xlab = "No. of overlaps with CNVs",
+   ylab = "Frequency", main = "Common CNVs\nCisplatin-1")
> arrows(CNV.cis1.breaks[1], 0.02, CNV.cis1.breaks[1], 0.001, lwd = 1,
+   col = 1, length = 0.1)
> text(CNV.cis1.breaks[1], 0.03, paste("Observed,\nN=", CNV.cis1.breaks[1],
+   sep = ""), cex = 0.8)
> legend("topright", legend = paste("P =", signif(P1, 2)), bty = "n",
+   lty = -1, lwd = -1, cex = 0.8)
> label.panel("A", xoff = 2)
```

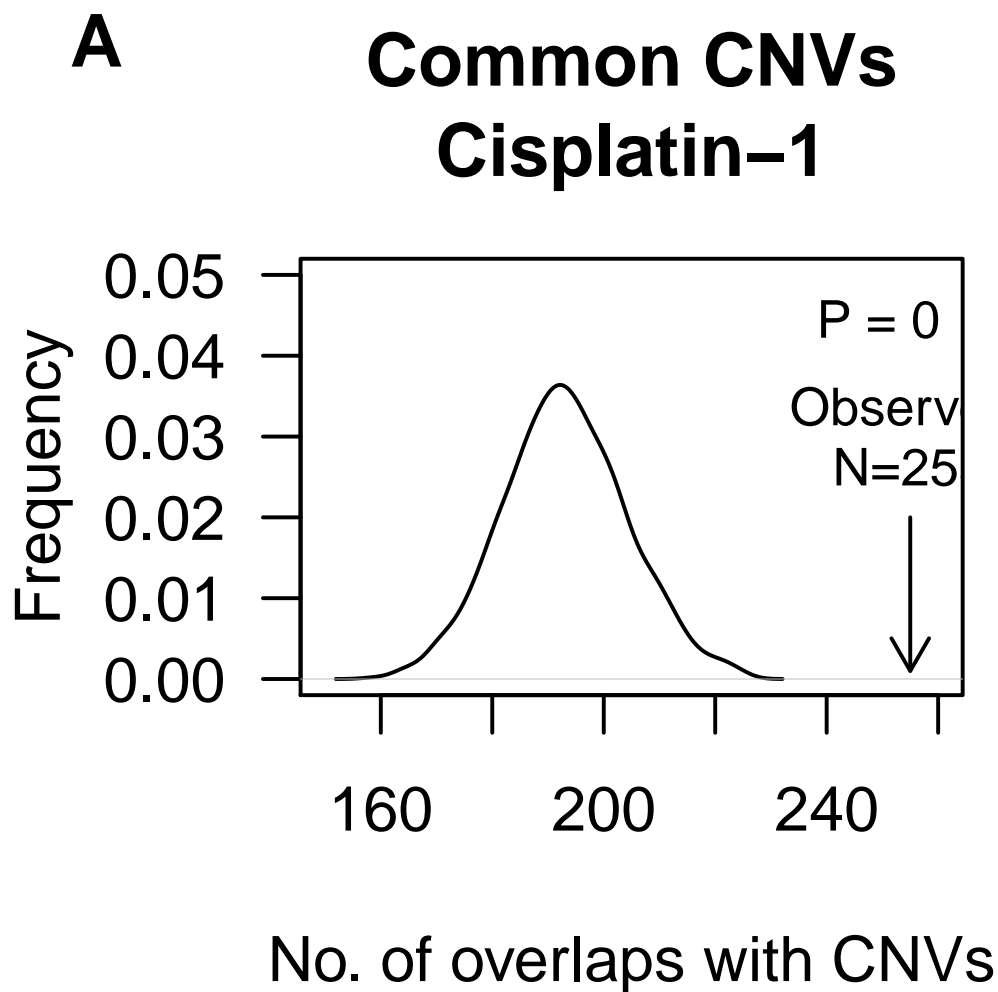

Plot figure 4B

```
> par(las = 1)
> tmp <- sapply(perm.list.36cont.20111020$perm.cnv.cis2.all, function(x) {
+   length(x[x != 0])
+ })
> P1 <- length(tmp[tmp >= CNV.cis2.breaks[1]])/1001
> plot(density(tmp), xlim = c(270, 360), ylim = c(0, 0.06), xlab = "No. of overlaps with CNVs",
+   ylab = "Frequency", main = "Common CNVs\nCisplatin-2")
> arrows(CNV.cis2.breaks[1], 0.02, CNV.cis2.breaks[1], 0.001, lwd = 1,
+   col = 1, length = 0.1)
> text(CNV.cis2.breaks[1], 0.03, paste("Observed,\nN=", CNV.cis2.breaks[1],
+   sep = ""), cex = 0.8)
> legend("topright", legend = paste("P =", signif(P1, 2)), bty = "n",
+   lty = -1, lwd = -1, cex = 0.8)
> label.panel("B", xoff = 2)
```

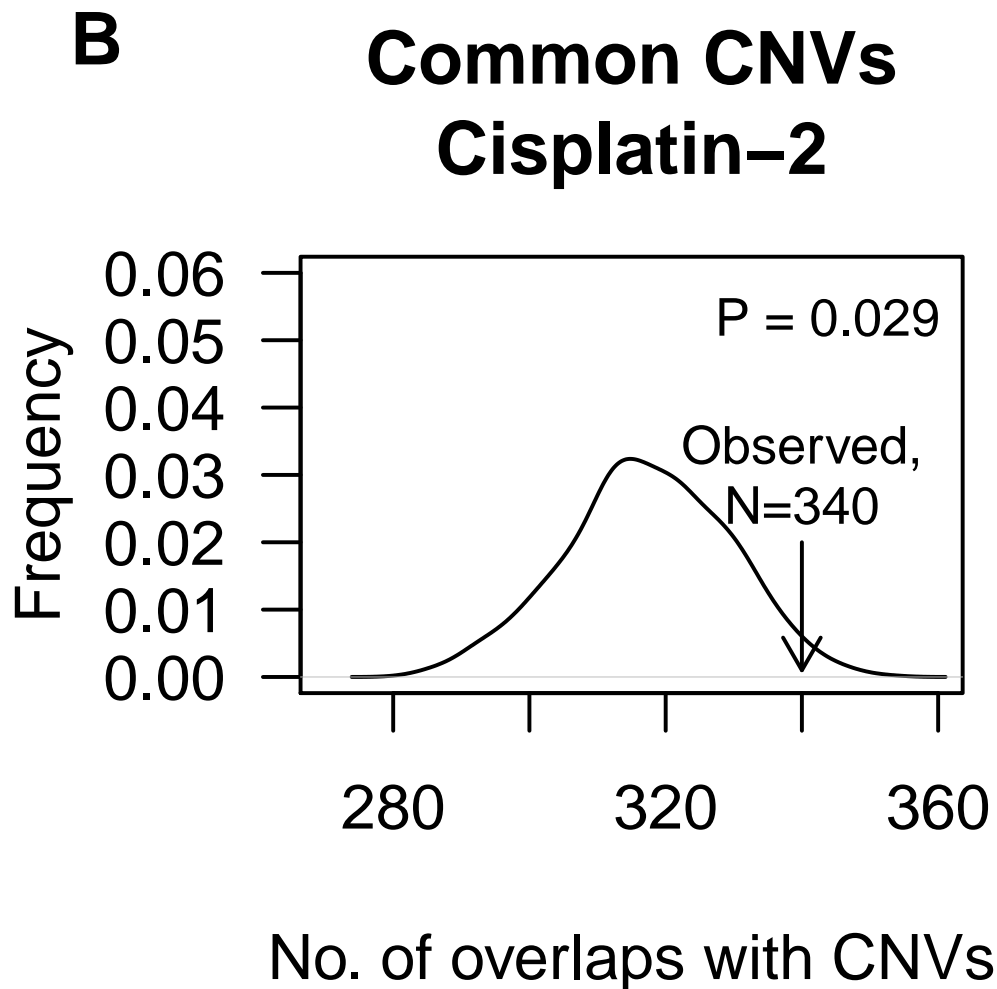

## 7 BRCA1 expression versus NtAI

### 7.1 BRCA1 in Cisplat-1 and Cisplatin-2, by qPCR

We have BRCA1 methylation and qPCR expression on only a subset of the trial samples. These do not entirely overlap with the samples for which we have SNP data, as the RNA/DNA content was insufficient in some cases. Therefore these data will be loaded and handled separately, so that we can use as many samples as possible. Ie, when we plot figure 5B (BRCA1 expression versus BRCA1 methylation) and SFig 6A (optimizing specificity and sensitivity via ROC curves), some samples will be plotted for which we do not have SNP data.

```
> brca1.methylation <- read.table("BRCA1_Methylation.txt", sep = "\t",
+   header = T, as.is = T)
> brca1.methylation
```

|    | Study       | Sample | Methylation | Mutation |
|----|-------------|--------|-------------|----------|
| 1  | Cisplatin 1 | P1     | 1           |          |
| 2  | Cisplatin 1 | P3     | 0           |          |
| 3  | Cisplatin 1 | P4     | 0           |          |
| 4  | Cisplatin 1 | P6     | 0           |          |
| 5  | Cisplatin 1 | P7     | 1           |          |
| 6  | Cisplatin 1 | P8     | 1           |          |
| 7  | Cisplatin 1 | P10    | 0           |          |
| 8  | Cisplatin 1 | P11    | 0           |          |
| 9  | Cisplatin 1 | P12    | 0           |          |
| 10 | Cisplatin 1 | P14    | 0           |          |
| 11 | Cisplatin 1 | P15    | 1           |          |
| 12 | Cisplatin 1 | P16    | 0           |          |
| 13 | Cisplatin 1 | P17    | 1           |          |
| 14 | Cisplatin 1 | P20    | 0           |          |
| 15 | Cisplatin 1 | P21    | 0           |          |
| 16 | Cisplatin 1 | P22    | 0           |          |
| 17 | Cisplatin 1 | P23    | 1           |          |
| 18 | Cisplatin 1 | P24    | 0           | BRCA2    |
| 19 | Cisplatin 1 | P25    | 1           |          |
| 20 | Cisplatin 1 | P26    | 1           |          |
| 21 | Cisplatin 1 | P27    | 0           |          |
| 22 | Cisplatin 1 | P28    | 0           |          |
| 23 | Cisplatin 1 | P29    | 0           |          |
| 24 | Cisplatin 2 | P3     | 0           |          |
| 25 | Cisplatin 2 | P4     | 1           |          |
| 26 | Cisplatin 2 | P6     | 1           |          |
| 27 | Cisplatin 2 | P9     | 0           |          |
| 28 | Cisplatin 2 | P10    | 0           |          |
| 29 | Cisplatin 2 | P13    | 1           |          |
| 30 | Cisplatin 2 | P14    | 0           |          |
| 31 | Cisplatin 2 | P15    | 0           | BRCA1    |
| 32 | Cisplatin 2 | P17    | 0           |          |
| 33 | Cisplatin 2 | P20    | 1           | BRCA1    |
| 34 | Cisplatin 2 | P30    | 1           |          |
| 35 | Cisplatin 2 | P32    | 0           |          |
| 36 | Cisplatin 2 | P37    | 0           |          |
| 37 | Cisplatin 2 | P48    | 1           |          |
| 38 | Cisplatin 2 | P49    | 0           |          |

```

> brca1.qpcr <- read.table("brca1_qpcr.txt", sep = "\t", header = T,
+   as.is = T)
> brca1.qpcr

```

|                 | Study       | Sample | MP.score | BRCA  | Expression  | Average.CT.B1.e16.e17 |
|-----------------|-------------|--------|----------|-------|-------------|-----------------------|
| 1               | Cisplatin 1 | P3     | 5        |       | 0.028164077 | 32.4                  |
| 2               | Cisplatin 1 | P6     | 1        |       | 0.030536249 | 32.2                  |
| 3               | Cisplatin 1 | P7     | 4        |       | 0.000405878 | 35.2                  |
| 4               | Cisplatin 1 | P8     | 4        |       | 0.008668512 | 32.8                  |
| 5               | Cisplatin 1 | P10    | 4        |       | 0.009843133 | 33.8                  |
| 6               | Cisplatin 1 | P12    | 1        |       | 0.014578640 | 30.7                  |
| 7               | Cisplatin 1 | P2     | 4        |       | 0.025382887 | 32.8                  |
| 8               | Cisplatin 1 | P11    | 3        |       | 0.003817031 | 34.8                  |
| 9               | Cisplatin 1 | P15    | 0        |       | 0.027840585 | 32.3                  |
| 10              | Cisplatin 1 | P4     | 1        |       | 0.014245664 | 33.6                  |
| 11              | Cisplatin 1 | P5     | 5        | BRCA1 | 0.020380501 | 33.0                  |
| 12              | Cisplatin 1 | P14    | 2        |       | 0.035896824 | 33.2                  |
| 13              | Cisplatin 1 | P16    | 1        |       | 0.056328154 | 32.5                  |
| 14              | Cisplatin 1 | P23    | 3        |       | 0.001586430 | 34.9                  |
| 15              | Cisplatin 1 | P28    | 2        |       | 0.019236631 | 32.4                  |
| 16              | Cisplatin 1 | P22    | 2        |       | 0.000573998 | 36.2                  |
| 17              | Cisplatin 1 | P25    | 3        |       | 0.031613108 | 33.4                  |
| 18              | Cisplatin 1 | P21    | 0        |       | 0.018367936 | 32.7                  |
| 19              | Cisplatin 1 | P24    | 2        | BRCA2 | 0.070153878 | 30.8                  |
| 20              | Cisplatin 1 | P29    | 5        |       | 0.002192309 | 34.4                  |
| 21              | Cisplatin 1 | P17    | 5        |       | 0.005274804 | 32.4                  |
| 22              | Cisplatin 1 | P20    | 2        |       | 0.012545670 | 33.9                  |
| 23              | Cisplatin 2 | P14    | 1        |       | 0.000051700 | 28.7                  |
| 24              | Cisplatin 2 | P10    | 1        |       | 0.000090900 | 28.6                  |
| 25              | Cisplatin 2 | P49    | 1        |       | 0.000030200 | 29.1                  |
| 26              | Cisplatin 2 | P19    | 2        |       | 0.000085200 | 28.3                  |
| 27              | Cisplatin 2 | P12    | 1        |       | 0.000010600 | 31.0                  |
| 28              | Cisplatin 2 | P30    | 1        |       | 0.000009910 | 31.1                  |
| 29              | Cisplatin 2 | P2     | 1        |       | 0.000043900 | 29.0                  |
| 30              | Cisplatin 2 | P11    | 3        |       | 0.000252795 | 26.8                  |
| 31              | Cisplatin 2 | P23    | 2        |       | 0.000041100 | 29.5                  |
| 32              | Cisplatin 2 | P32    | 1        |       | 0.000198318 | 27.2                  |
| 33              | Cisplatin 2 | P3     | 4        |       | 0.000028800 | 29.7                  |
| 34              | Cisplatin 2 | P4     | 3        |       | 0.000030400 | 30.2                  |
| 35              | Cisplatin 2 | P37    | 3        |       | 0.000116658 | 27.4                  |
| 36              | Cisplatin 2 | P15    | 5        | BRCA1 | 0.000086700 | 28.4                  |
| 37              | Cisplatin 2 | P41    | 5        |       | 0.000008350 | 31.9                  |
| 38              | Cisplatin 2 | P9     | 1        |       | 0.000033900 | 29.4                  |
| 39              | Cisplatin 2 | P20    | 2        | BRCA1 | 0.000105089 | 28.7                  |
| 40              | Cisplatin 2 | P13    | 3        |       | 0.000030500 | 29.3                  |
| 41              | Cisplatin 2 | P27    | 4        |       | 0.000068600 | 28.3                  |
| 42              | Cisplatin 2 | P48    | 4        |       | 0.000011400 | 31.0                  |
| 43              | Cisplatin 2 | P17    | 5        |       | 0.000002280 | 32.9                  |
| 44              | Cisplatin 2 | P6     | 4        |       | 0.000003390 | 32.8                  |
| Average.CT.36B4 |             |        |          |       |             |                       |
| 1               |             |        |          |       |             | 27.25                 |
| 2               |             |        |          |       |             | 27.17                 |
| 3               |             |        |          |       |             | 23.97                 |
| 4               |             |        |          |       |             | 25.95                 |

|    |       |
|----|-------|
| 5  | 27.17 |
| 6  | 24.60 |
| 7  | 27.50 |
| 8  | 26.77 |
| 9  | 27.13 |
| 10 | 27.47 |
| 11 | 27.33 |
| 12 | 28.40 |
| 13 | 28.30 |
| 14 | 25.63 |
| 15 | 26.67 |
| 16 | 25.47 |
| 17 | 28.37 |
| 18 | 26.93 |
| 19 | 26.97 |
| 20 | 25.53 |
| 21 | 24.80 |
| 22 | 27.53 |
| 23 | 14.48 |
| 24 | 15.17 |
| 25 | 14.11 |
| 26 | 14.78 |
| 27 | 14.51 |
| 28 | 14.45 |
| 29 | 14.56 |
| 30 | 14.83 |
| 31 | 14.98 |
| 32 | 14.85 |
| 33 | 14.64 |
| 34 | 15.16 |
| 35 | 14.37 |
| 36 | 14.90 |
| 37 | 15.00 |
| 38 | 14.57 |
| 39 | 15.51 |
| 40 | 14.30 |
| 41 | 14.50 |
| 42 | 14.60 |
| 43 | 14.21 |
| 44 | 14.66 |

The BRCA1 qPCR expression data is normalized to the housekeeping gene RPLP0. Average raw cycle numbers for each gene is in columns 6 and 7. Note that the BRCA1 expression levels for Cisplatin 1 and Cisplatin 2 are not directly comparable in their raw form, as the RNA from Cisplatin 1 was significantly more diluted, and run two years earlier on a different PCR machine.

As the data points are few in each trial individually, we combine the two trials by centering the expression data, and dividing by the standard deviation. Assuming the distribution of the expression values are similar in each trial, this will allow us to combine them.

Make vectors that hold the expression of each trial, and make sure the naming convention matches the NtAI data

```
> dfci1.brca1.meth <- brca1.methylation[brca1.methylation$Study ==
+   "Cisplatin 1", "Methylation"]
> names(dfci1.brca1.meth) <- paste(sub("P", "X", brca1.methylation[brca1.methylation$Study ==
```

```

+   "Cisplatin 1", "Sample"]), "T", sep = "")
> dfci2.brca1.meth <- brca1.methylation[brca1.methylation$Study ==
+   "Cisplatin 2", "Methylation"]
> names(dfci2.brca1.meth) <- brca1.methylation[brca1.methylation$Study ==
+   "Cisplatin 2", "Sample"]
> dfci1.brca1.qpcr <- brca1.qpcr[brca1.qpcr$Study == "Cisplatin 1",
+   "Expression"]
> names(dfci1.brca1.qpcr) <- paste(sub("P", "X", brca1.qpcr[brca1.qpcr$Study ==
+   "Cisplatin 1", "Sample"]), "T", sep = "")
> dfci2.brca1.qpcr <- brca1.qpcr[brca1.qpcr$Study == "Cisplatin 2",
+   "Expression"]
> dfci2.brca1.mpscore.qpcr <- brca1.qpcr[brca1.qpcr$Study == "Cisplatin 2",
+   "MP.score"]
> dfci2.brca1.brcamut.qpcr <- brca1.qpcr[brca1.qpcr$Study == "Cisplatin 2",
+   "BRCA"]
> names(dfci2.brca1.mpscore.qpcr) <- names(dfci2.brca1.brcamut.qpcr) <- names(dfci2.brca1.qpcr) <
+   "Cisplatin 2", "Sample"]

```

## 7.2 Figure 5

Now prepare to plot figure 5.

```
> dfci.comb.ntai <- c(no.tel.dfci1[dfci1.cont >= cont.max, 1],
+   no.tel.dfci2[dfci2.cont >= cont.max, 1])
> dfci.comb.qpcr <- c(scale(log2(dfci1.brca1.qpcr))[, 1], scale(log2(dfci2.brca1.qpcr))[,
+   1])
> dfci.comb.brca1meth <- c(dfci1.brca1.meth, dfci2.brca1.meth)
> dfci.comb.brcamut <- c(dfci1.brca[dfci1.cont >= cont.max], dfci2.brca[dfci2.cont >=
+   cont.max])
> names(dfci.comb.brcamut) <- c(paste(sub("P", "X", names(dfci1.brca[dfci1.cont >=
+   cont.max])), "T", sep = ""), names(dfci2.brca[dfci2.cont >=
+   cont.max]))
> dfci.comb.mp <- c(dfci1.mpgrade[dfci1.cont >= cont.max], dfci2.mpgrade[dfci2.cont >=
+   cont.max])
> names(dfci.comb.mp) <- c(paste(sub("P", "X", names(dfci1.mpgrade[dfci1.cont >=
+   cont.max])), "T", sep = ""), names(dfci2.mpgrade[dfci2.cont >=
+   cont.max]))
> dfci.comb.mp.qpcr <- brca1.qpcr[, "MP.score"]
> names(dfci.comb.mp.qpcr) <- c(names(dfci1.brca1.qpcr), names(dfci2.brca1.qpcr))
> dfci.comb.brcamut.qpcr <- c(0, 1)[match(brca1.qpcr[, "BRCA"] ==
+   "", c("TRUE", "FALSE"))]
> names(dfci.comb.brcamut.qpcr) <- c(names(dfci1.brca1.qpcr), names(dfci2.brca1.qpcr))
> dfci.comb.brca1meth.qpcr <- c("Negative", "Positive", "Unknown")[match(dfci.comb.brca1meth[name
+   c(0, 1, NA)]]
> names(dfci.comb.brca1meth.qpcr) <- c(names(dfci1.brca1.qpcr),
+   names(dfci2.brca1.qpcr))
```

Now we can plot figure 5A, BRCA1 expression by qPCR in Cisplatin-2, versus response. No BRCA1 mutation carriers

```
> par(las = 1, cex = 1, bty = "l", pty = "s", mar = c(4, 4, 2,
+   2) + 0.1)
> indx <- dfci2.brca1.brcamut.qpcr == ""
> boxplot(log10(dfci2.brca1.qpcr[indx]/dfci2.brca1.qpcr[indx][1]) ~
+   dfci2.brca1.mpscore.qpcr[indx] > 3, main = "Fig 5A", ylab = "BRCA1 mRNA",
+   xlab = "", names = c("Resistant", "Sensitive"), axes = F,
+   ylim = c(-2, 1))
> beeswarm(log10(dfci2.brca1.qpcr[indx]/dfci2.brca1.qpcr[indx][1]) ~
+   dfci2.brca1.mpscore.qpcr[indx] > 3, pch = 16, col = c(1,
+   2), add = T)
> a <- signif(wilcox.test(log10(dfci2.brca1.qpcr[indx]/dfci2.brca1.qpcr[indx][1]) ~
+   dfci2.brca1.mpscore.qpcr[indx] > 3)$p.value, 2)
> legend("topleft", legend = paste("P = ", a, sep = ""), bty = "n",
+   pch = -1)
> axis(1, at = c(1, 2), labels = c("Resistant", "Sensitive"))
> box()
> axis(2, at = log10(c(0.01, 0.1, 1, 10)), labels = c(0.01, 0.1,
+   1, 10))
> label.panel("A", xoff = 2)
```



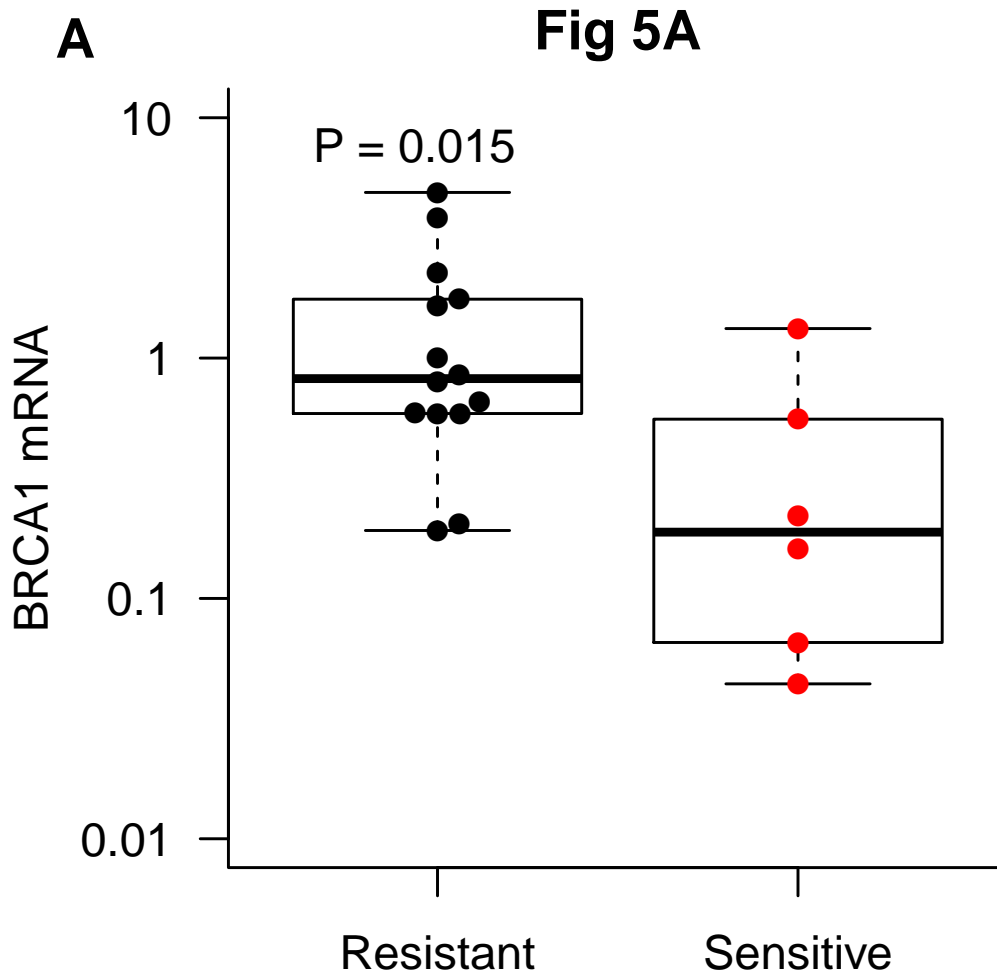

And here comes figure 5B, BRCA1 expression by qPCR in Cisplatin-2, versus BRCA1 methylation. No BRCA1 mutation carriers

Figure 5B

Now plot panel B, BRCA1 expression by qPCR versus methylation

```
> par(las = 1, cex = 1, bty = "l", pty = "s", mar = c(4, 4, 2,
+ 2) + 0.1)
> boxplot(dfci.comb.qpcr[dfci.comb.brcamut.qpcr == 0] ~ dfci.comb.brca1meth.qpcr[dfci.comb.brcamut.qpcr == 0], ylim = c(-2.4, 2.5), ylab = "BRCA1 mRNA", xlab = "BRCA1 methylation",
+ main = "Fig 5B", outline = F)
> beeswarm(dfci.comb.qpcr[dfci.comb.brcamut.qpcr == 0] ~ dfci.comb.brca1meth.qpcr[dfci.comb.brcamut.qpcr == 0], add = T, pwidth = c(1, 2)[match(dfci.comb.mp.qpcr[dfci.comb.brcamut.qpcr == 0] > 3, c("FALSE", "TRUE"))], pch = c(16, 16, 16))
> legend("bottomright", legend = paste("P =", signif(wilcox.test(dfci.comb.qpcr[dfci.comb.brcamut.qpcr == 0] ~ dfci.comb.brca1meth.qpcr[dfci.comb.brcamut.qpcr == 0],
+ subset = dfci.comb.brca1meth.qpcr[dfci.comb.brcamut.qpcr == 0] != "Unknown")$p.value, 3)), bty = "n")
> legend("topright", legend = c("Resistant", "Sensitive"), col = c(1, 2), pch = c(16, 16))
```

```
> label.panel("B", xoff = 2)
```

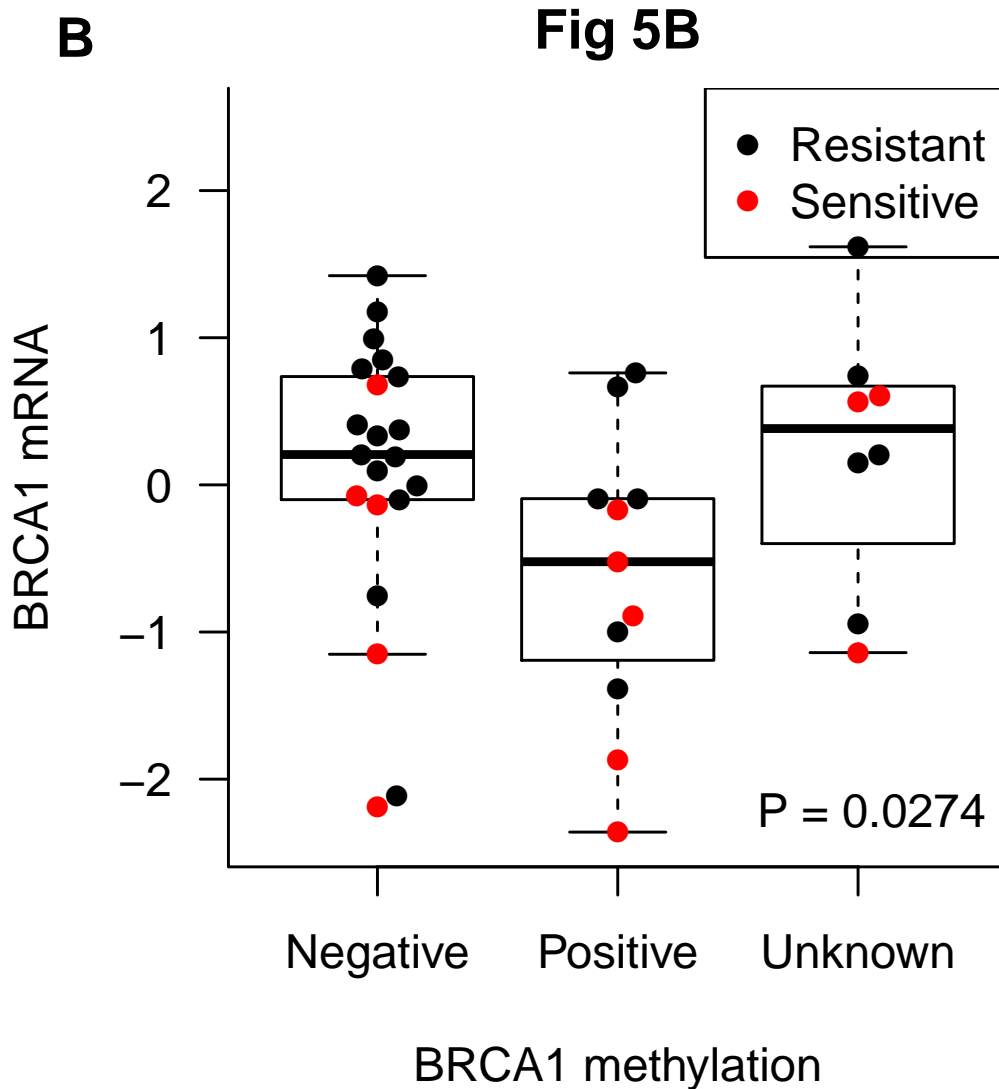

And finally we can plot figure 5C, NtAI versus BRCA1 qPCR, with colors representing response, and shapes representing BRCA1/2 mutation carriers

Figure 5C

```
> indx <- intersect(names(dfci.comb.ntai), names(dfci.comb.qpcr))
> par(las = 1, cex = 1, bty = "l", pty = "s", mar = c(4, 4, 2,
+ 2) + 0.1)
> plot(dfci.comb.ntai[indx], dfci.comb.qpcr[indx], col = c(1, 2)[match(dfci.comb.mp[indx] >
+ 3, c("FALSE", "TRUE"))], pch = c(16, 17)[match(dfci.comb.brcamut[indx],
+ c(0, 1))], main = "Fig 5C", ylab = "BRCA1 mRNA", xlab = expression(N[tAI]),
+ ylim = c(-3, 2))
> legend("bottomleft", legend = c("Resistant", "Sensitive", "BRCA mut"),
+ col = c(1, 2, 1), pch = c(15, 15, 2))
> a <- cor.test(dfci.comb.ntai[indx][dfci.comb.brcamut[indx] ==
+ 0], dfci.comb.qpcr[indx][dfci.comb.brcamut[indx] == 0], method = "spearman")
> legend("topleft", legend = paste("r = ", signif(a$estimate, 3),
+ ", P = ", signif(a$p.value, 3), sep = ""), bty = "n", pch = -1)
```

```

> abline(lm(dfci.comb.qpcr[indx][dfci.comb.brcamut[indx] == 0] ~
+   dfci.comb.ntai[indx][dfci.comb.brcamut[indx] == 0]), lty = 2)
> label.panel("A", xoff = 2)

```

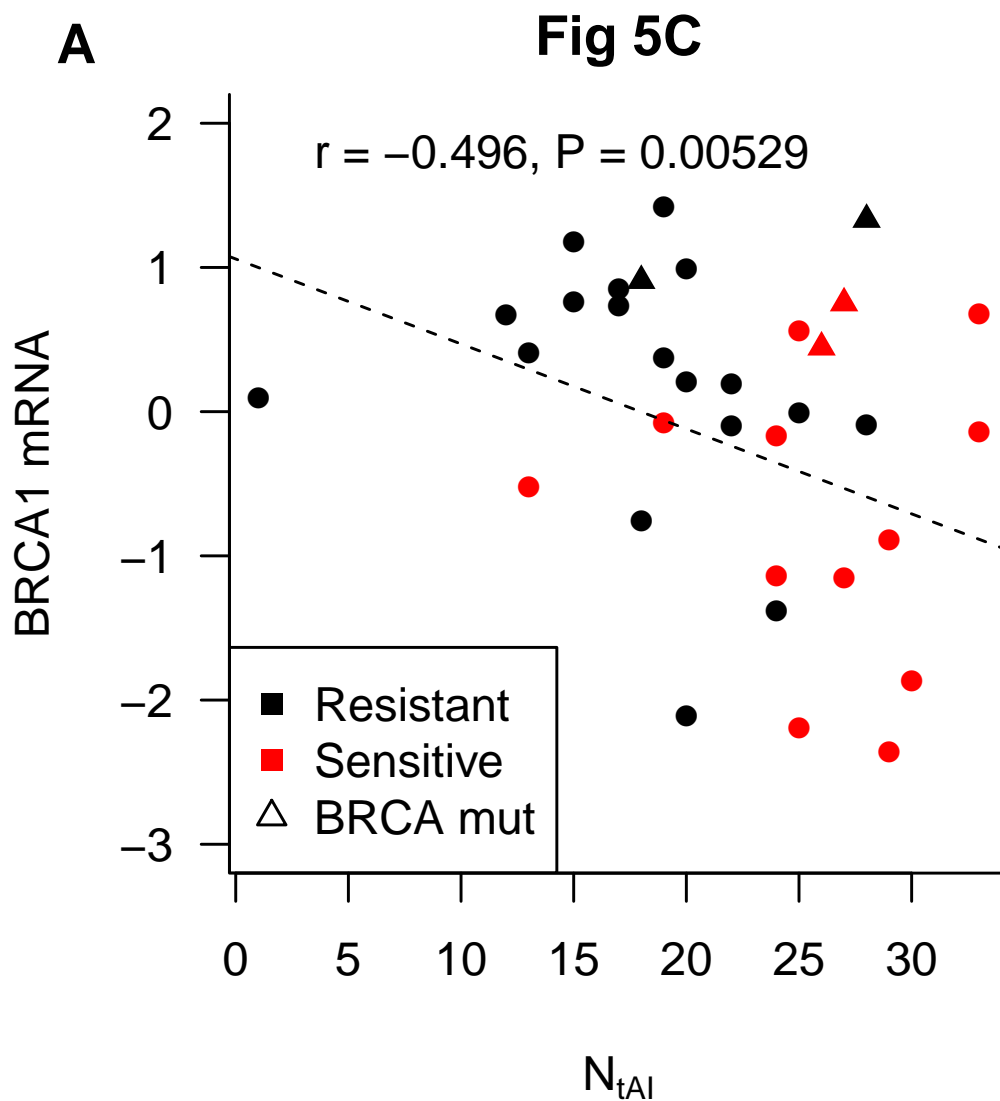

And quickly test if methylation is significantly associated with response:

```

> meth.indx <- intersect(intersect(names(dfci.comb.brca1meth),
+   names(dfci.comb.mp.qpcr)), names(dfci.comb.brcamut.qpcr[dfci.comb.brcamut.qpcr ==
+   0]))
> fisher.test(table(dfci.comb.mp.qpcr[meth.indx] > 3, dfci.comb.brca1meth[meth.indx]))

```

Fisher's Exact Test for Count Data

```

data: table(dfci.comb.mp.qpcr[meth.indx] > 3, dfci.comb.brca1meth[meth.indx])
p-value = 0.2515
alternative hypothesis: true odds ratio is not equal to 1
95 percent confidence interval:
 0.4260148 16.3891269
sample estimates:

```

odds ratio  
2.579584

It is not.

### 7.3 Supplementary figure 6

Now prepare for supplementary figure 6. Here we use ROC curves to find the optimum threshold of both NtAI and BRCA1 expression, that gives the best prediction of cisplatin response.

```
> R.NtAI <- rocdemo.sca(c(0, 1)[match(dfci.comb.mp > 3, c("FALSE",
+ "TRUE"))], dfci.comb.ntai)
> P.NtAI <- signif(wilcox.test(dfci.comb.ntai ~ c(0, 1)[match(dfci.comb.mp >
+ 3, c("FALSE", "TRUE"))])$p.value, 3)
> R.qpcr <- rocdemo.sca(c(1, 0)[match(dfci.comb.mp.qpcr[dfci.comb.brcamut.qpcr ==
+ 0] > 3, c("FALSE", "TRUE"))], dfci.comb.qpcr[dfci.comb.brcamut.qpcr ==
+ 0])
> P.qpcr <- signif(wilcox.test(dfci.comb.qpcr[dfci.comb.brcamut.qpcr ==
+ 0] ~ c(1, 0)[match(dfci.comb.mp.qpcr[dfci.comb.brcamut.qpcr ==
+ 0] > 3, c("FALSE", "TRUE"))])$p.value, 3)
> cut.indx.NtAI <- which(sqrt((1 - R.NtAI@sens)^2 + (1 - R.NtAI@spec)^2) ==
+ min(sqrt((1 - R.NtAI@sens)^2 + (1 - R.NtAI@spec)^2)))
> optimum.cut.NtAI <- R.NtAI@cuts[cut.indx.NtAI]
> cut.indx.qpcr <- which(sqrt((1 - R.qpcr@sens)^2 + (1 - R.qpcr@spec)^2) ==
+ min(sqrt((1 - R.qpcr@sens)^2 + (1 - R.qpcr@spec)^2)))
> optimum.cut.qpcr <- R.qpcr@cuts[cut.indx.qpcr]
```

Now plot supplementary figure 6A

```
> par(las = 1, cex = 1, bty = "l", pty = "s", mar = c(4, 4, 2,
+ 2) + 0.1)
> plot(R.NtAI, ylab = "Sensitivity", xlab = "1-specificity", lty = 2,
+ col = 1, lwd = 1, main = "SFig 6A")
> points(R.qpcr, type = "l", lty = 2, col = 4)
> lines(c(0, 1), c(0, 1), lty = 3)
> legend("bottomright", legend = c(paste("AUC,NtAI = ", signif(AUC(R.NtAI),
+ 2), ", P = ", P.NtAI, sep = ""), paste("AUC, BRCA1 qPCR = ",
+ signif(AUC(R.qpcr), 2), ", P = ", P.qpcr, sep = "")), lty = c(2,
+ 2), col = c(1, 4), lwd = c(1, 1), text.col = c(1, 4), bty = "n")
> points((1 - R.NtAI@spec[cut.indx.NtAI]), R.NtAI@sens[cut.indx.NtAI],
+ pch = 16, col = 1)
> points((1 - R.qpcr@spec[cut.indx.qpcr]), R.qpcr@sens[cut.indx.qpcr],
+ pch = 16, col = 4)
> label.panel("A", xoff = 2)
```

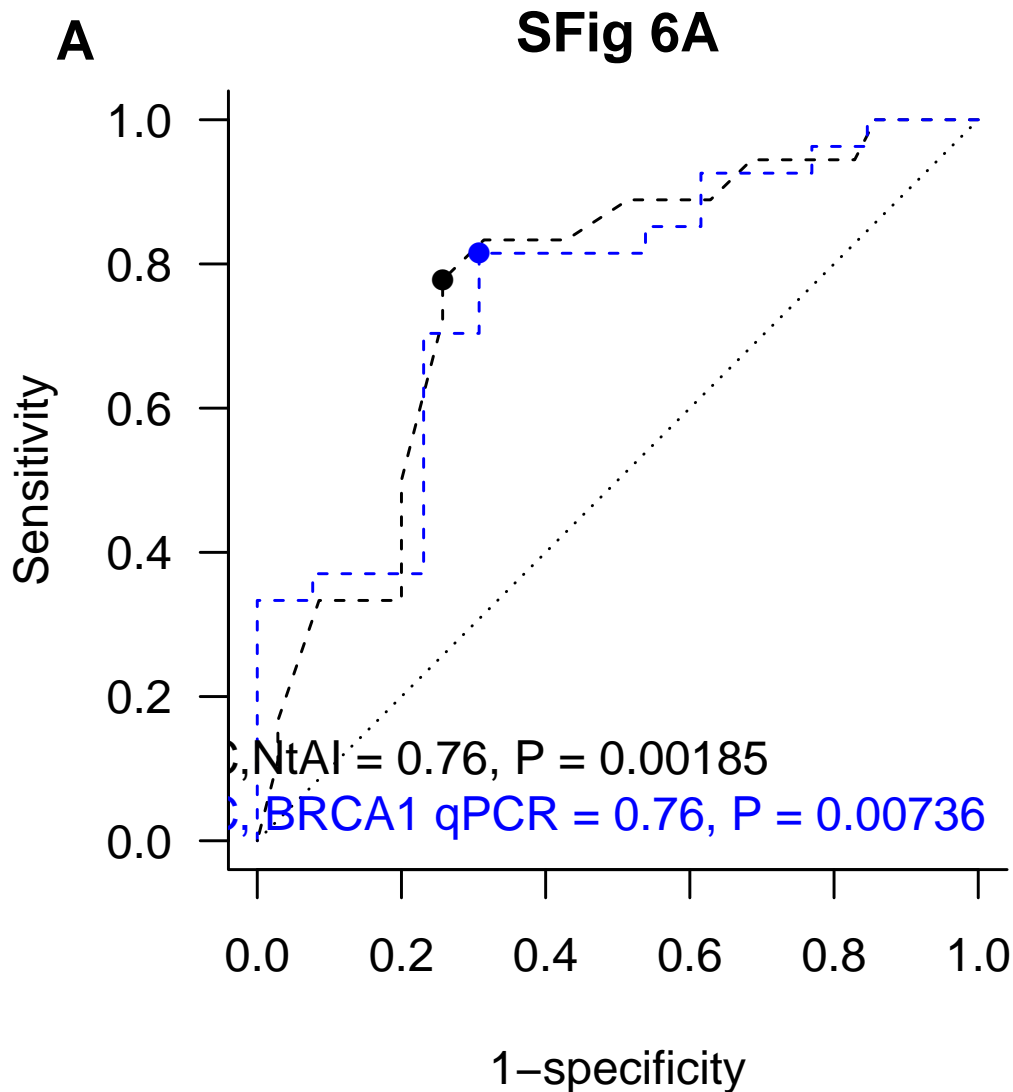

Now plot supplementary figure 6B, only with overlap between samples with NtAI and BRCA1 qPCR expression. No BRCA1/2 mutation carriers.

```
> par(las = 1, cex = 1, bty = "l", pty = "s", mar = c(4, 4, 2,
+ 2) + 0.1)
> indx <- intersect(names(dfci.comb.ntai), names(dfci.comb.brcamut.qpcr[dfci.comb.brcamut.qpcr ==
+ 0]))
> plot(dfci.comb.ntai[indx], dfci.comb.qpcr[indx], pch = 10, col = c(1,
+ 2)[match(dfci.comb.mp[indx] > 3, c("FALSE", "TRUE"))], ylab = "BRCA1 mRNA",
+ xlab = expression(N[tAI]), main = "SFig 6B", ylim = c(-3,
+ 2))
> abline(h = optimum.cut.qpcr, v = optimum.cut.NtAI, lty = 2)
> a <- dfci.comb.mp[indx] > 3
> llq <- table(dfci.comb.ntai[indx] < optimum.cut.NtAI & dfci.comb.qpcr[indx] <
+ optimum.cut.qpcr, a)
> lrq <- table(dfci.comb.ntai[indx] > optimum.cut.NtAI & dfci.comb.qpcr[indx] <
+ optimum.cut.qpcr, a)
> ulq <- table(dfci.comb.ntai[indx] < optimum.cut.NtAI & dfci.comb.qpcr[indx] >
+ optimum.cut.qpcr, a)
```

```

> urq <- table(dfci.comb.ntai[indx] > optimum.cut.NtAI & dfci.comb.qpcr[indx] >
+   optimum.cut.qpcr, a)
> legend("topleft", legend = paste("Sens: ", ulq[2, 2], "/", sum(ulq[2,
+   ]), sep = ""), bty = "n", pch = -1)
> legend("topright", legend = paste("Sens: ", urq[2, 2], "/", sum(urq[2,
+   ]), sep = ""), bty = "n", pch = -1)
> legend("bottomleft", legend = paste("Sens: ", llq[2, 2], "/",
+   sum(llq[2, ]), sep = ""), bty = "n", pch = -1)
> legend("bottomright", legend = paste("Sens: ", lrq[2, 2], "/",
+   sum(lrq[2, ]), sep = ""), bty = "n", pch = -1)
> label.panel("B", xoff = 2)

```

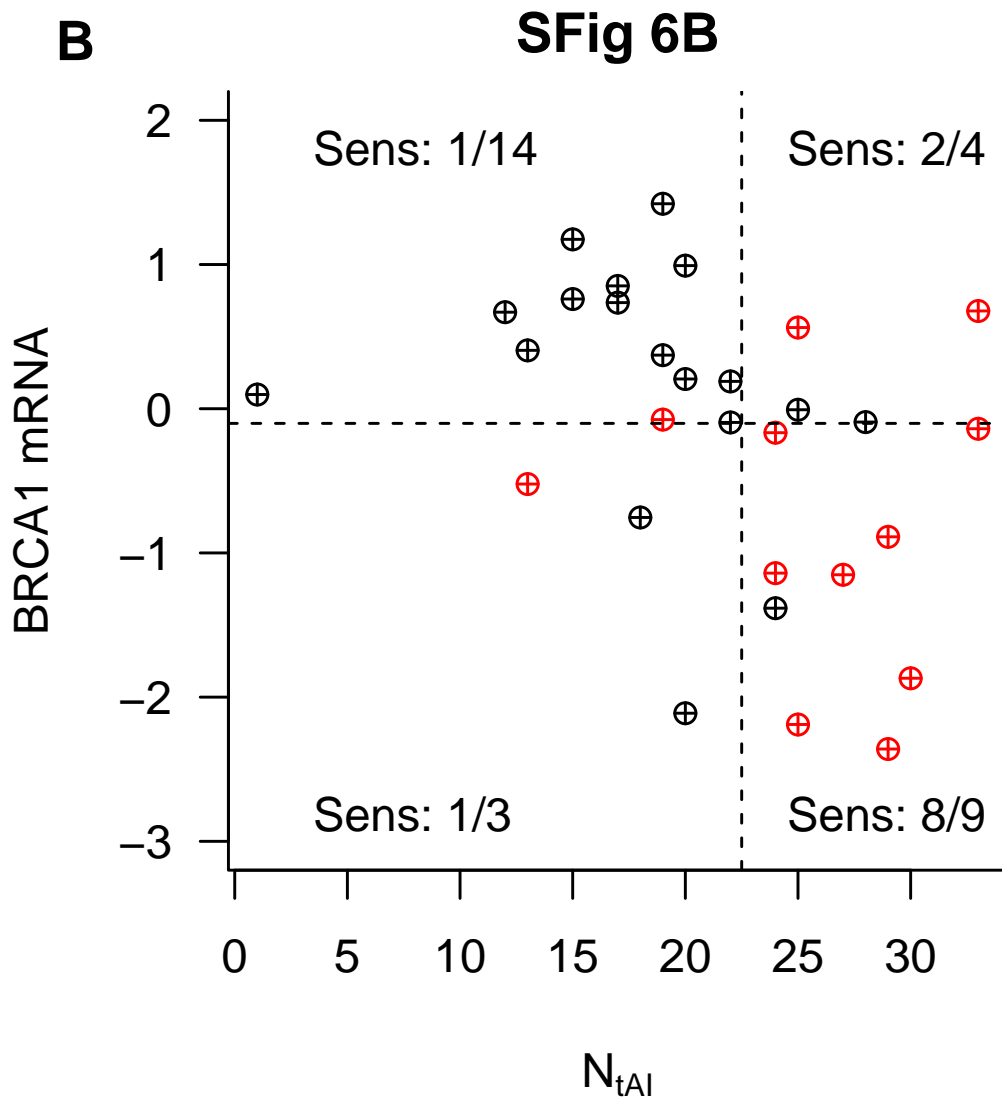

Now make a table showing ACC, PPV, NPV, SENS, RES, and p-value for predicting cis-platin response using: NtAI alone, BRCA1 expression alone, and then combined. Use only the overlapping samples, so it is comparable.

```

> table1 <- cbind(acc.calc(dfci.comb.ntai[indx] > optimum.cut.NtAI,
+   dfci.comb.mp[indx] > 3), acc.calc(dfci.comb.qpcr[indx] <
+   optimum.cut.qpcr, dfci.comb.mp[indx] > 3), acc.calc(dfci.comb.ntai[indx] >

```

```

+     optimum.cut.NtAI & dfci.comb.qpcr[indx] < optimum.cut.qpcr,
+     dfci.comb.mp[indx] > 3))
> colnames(table1) <- c("NtAI", "BRCA1qPCR", "NtAI+BRCA1qPCR")
> table1

      NtAI  BRCA1qPCR NtAI+BRCA1qPCR
ACC 0.8333333333 0.800000000 0.8333333333
PPV 0.7692307692 0.750000000 0.8888888889
NPV 0.8823529412 0.833333333 0.8095238095
SENS 0.8333333333 0.750000000 0.6666666667
SPEC 0.8333333333 0.833333333 0.9444444444
P    0.0005367241 0.002409426 0.0006381425

> write.table(table1, file = "table.sfig6.txt", sep = "\t", quote = F)

```



## 7.4 BRCA1 expression in TCGA TNBC and Ovarian cohorts

Here we will plot the correlation between BRCA1 mRNA by micro array, and NtAI, in the TCGA TNBC and ovarian cohorts. We know BRCA1/2 mutation status for the ovarian cohort, thus this is based only on the wtBRCA samples.

First in the TNBC cohort

## 7.5 Supplementary figure 7

```
> par(las = 1, cex = 1, bty = "l", pty = "s", mar = c(4, 4, 2,
+ 2) + 0.1)
> plot(no.tel.tcga.tnbc[tcga_breast_tnbc.cont.sw >= cont.max, 1],
+      tcga.breast.ge.level3["BRCA1", tcga_breast_tnbc.cont.sw >=
+      cont.max], ylab = "BRCA1 mRNA", xlab = expression(N[tAI]),
+      main = "SFIG 7A TCGA TNBC", ylim = c(-3.5, 0.2))
> abline(lm(tcga.breast.ge.level3["BRCA1", tcga_breast_tnbc.cont.sw >=
+      cont.max] ~ no.tel.tcga.tnbc[tcga_breast_tnbc.cont.sw >=
+      cont.max, 1]), lty = 2)
> a <- cor.test(no.tel.tcga.tnbc[tcga_breast_tnbc.cont.sw >= cont.max,
+ 1], tcga.breast.ge.level3["BRCA1", tcga_breast_tnbc.cont.sw >=
+ cont.max], method = "spearman")
> legend("topleft", legend = paste("r = ", signif(a$estimate, 2),
+ ", P = ", signif(a$p.value, 2), sep = ""), lty = -1, pch = -1,
+       bty = "n")
> label.panel("A", xoff = 2)
```

## A SFIG 7A TCGA TNBC

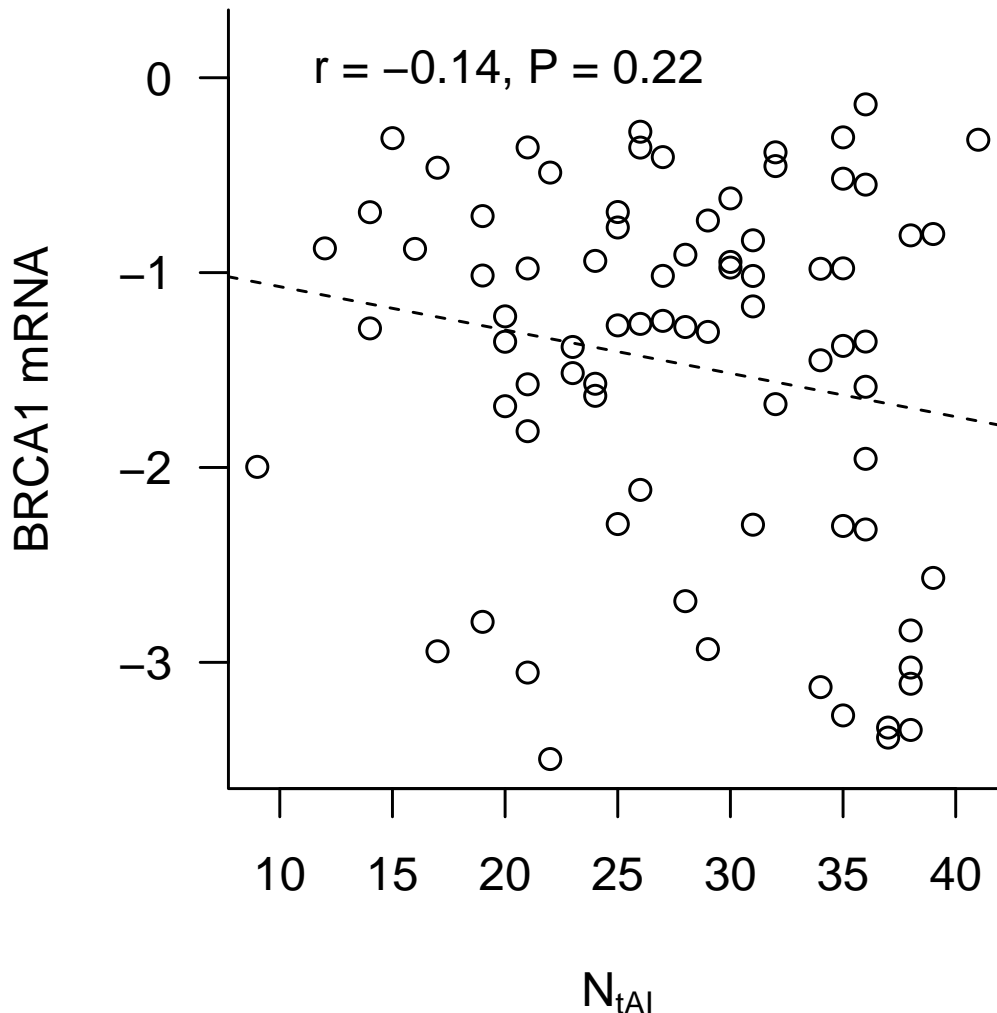

Now in the ovarian cohort. Here we will subset the samples to only include those that have follow up data, and received platinum.

```
> par(las = 1, cex = 1, bty = "l", pty = "s", mar = c(4, 4, 2,
+ 2) + 0.1)
> tcga.subset.vec <- intersect(names(tcga.ov.wtbrca[tcga.ov.wtbrca]),
+ colnames(tcga.ovarian.eset))
> plot(no.tel.tcga[tcga.subset.vec, 1], tcga.ovarian.eset[brca.probe,
+ tcga.subset.vec], ylab = "BRCA1 mRNA", xlab = expression(N[tAI]),
+ col = c(1, 2)[match(tcga.ov.outcome.180[tcga.subset.vec],
+ c("FALSE", "TRUE"))], main = "SFIG 7B TCGA ovarian")
> abline(lm(tcga.ovarian.eset[brca.probe, tcga.subset.vec] ~ no.tel.tcga[tcga.subset.vec,
+ 1]), lty = 2)
> a <- cor.test(no.tel.tcga[tcga.subset.vec, 1], tcga.ovarian.eset[brca.probe,
+ tcga.subset.vec], method = "spearman")
> legend("topleft", legend = paste("r = ", signif(a$estimate, 2),
+ ", P = ", signif(a$p.value, 2), sep = "" ), lty = -1, pch = -1,
+ bty = "n")
> legend("bottomleft", legend = c("Resistant", "Sensitive"), col = c(1,
```

```
+ 2), pch = 1)
> label.panel("B", xoff = 2)
```

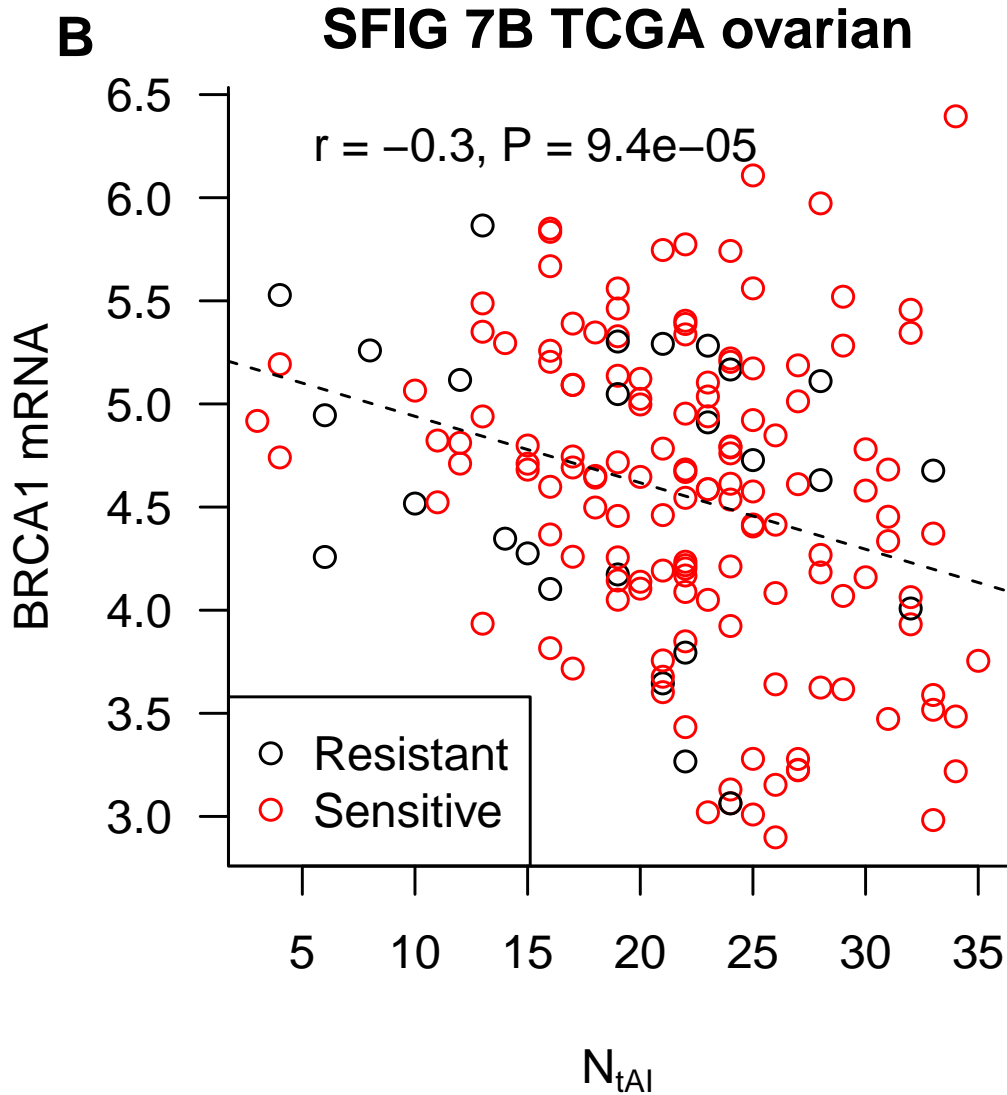

And finally we will plot figure S7C, which shows the association between BRCA1 expression and response in the TCGA ovarian cohort, using the same samples as above.

```
> par(las = 1, cex = 1, bty = "l", pty = "s", mar = c(4, 4, 2,
+ 2) + 0.1)
> boxplot(tcga.ovarian.eset[brca.probe, tcga.subset.vec] ~ tcga.ov.outcome.180[tcga.subset.vec],
+ ylab = "BRCA1 mRNA", xlab = "", notch = F, names = c("Resistant",
+ "Sensitive"), main = "SFig 7C TCGA ovarian", outline = F,
+ ylim = c(2.8, 7))
> beeswarm(tcga.ovarian.eset[brca.probe, tcga.subset.vec] ~ tcga.ov.outcome.180[tcga.subset.vec],
+ col = c(1, 2), add = T, pch = 1, method = "hex", cex = 0.8)
> a <- signif(wilcox.test(tcga.ovarian.eset[brca.probe, tcga.subset.vec] ~
+ tcga.ov.outcome.180[tcga.subset.vec])$p.value, 2)
> legend("topleft", legend = paste("P =", a), lty = -1, pch = -1,
+ bty = "n")
> label.panel("C", xoff = 2)
```

**C**

**SFig 7C TCGA ovarian**

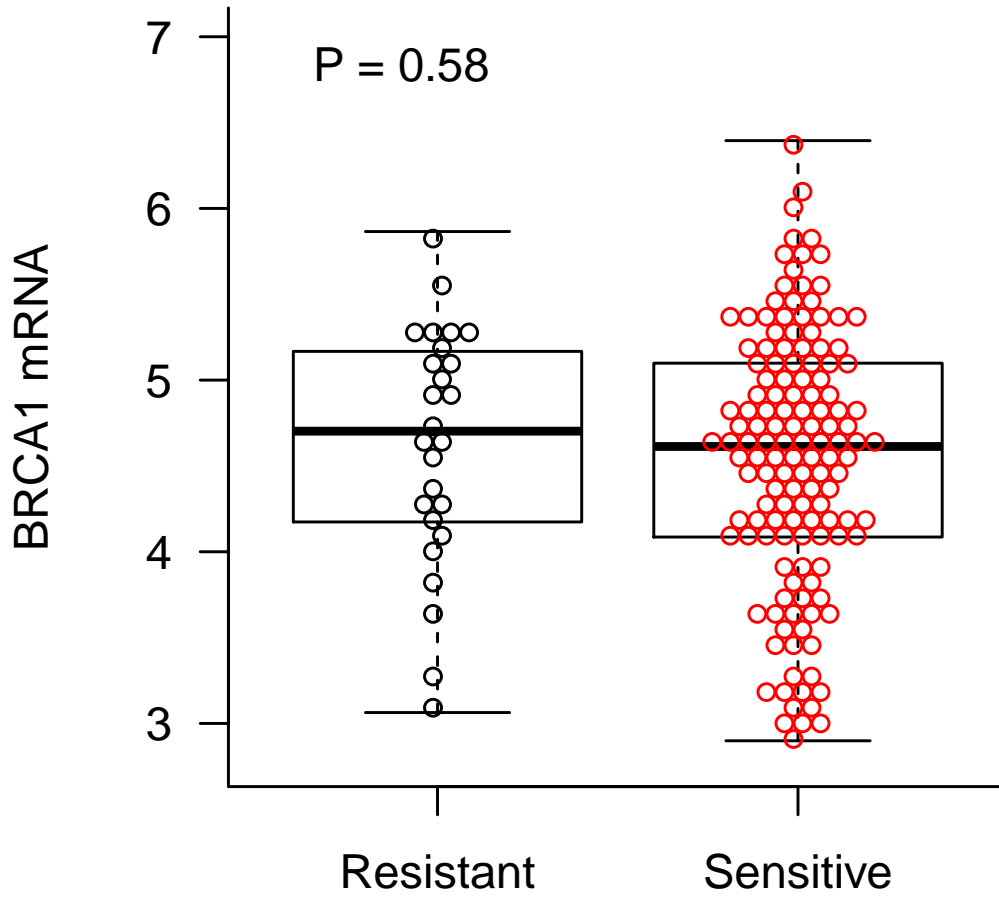

## 8 Optimize for platform-specific probe numbers

Four patient samples were tested on both versions of the Oncoscan platform: P11, P23, P24 and P27. The probe densities on two Oncoscan platforms were 42,000 probes and 330,000 probes respectively, giving an approximate ratio of 1:8.

Load data:

```
> load("cis1mcp.opto.RData")
> load("cis2mcp.opto.RData")
> load("cis1cna.opto.RData")
> load("cis2cna.opto.RData")
```

Test the ranks of telomeric and interstitial AI and CNA, when using no minimum number of probes

```
> mip1tel.tmp <- no.tel(cis1mcp.opto, chrominfo = chrominfo, min.size = 0,
+   min.probes = 1)
> mip2tel.tmp <- no.tel(cis2mcp.opto, chrominfo = chrominfo, min.size = 0,
+   min.probes = 1)
> mip1tel.cna.tmp <- no.tel.cna(cis1cna.opto, chrominfo = chrominfo,
+   min.size = 0, gain = log2(2.5/2), loss = log2(1.5/2), min.probes = 1)
> mip2tel.cna.tmp <- no.tel.cna(cis2cna.opto, chrominfo = chrominfo,
+   min.size = 0, gain = log2(2.5/2), loss = log2(1.5/2), min.probes = 1)
> mip1gaps <- gaps(cis1cna.opto, min.size = 0, gain = log2(2.5/2),
+   loss = log2(1.5/2), min.probes = 1)
> mip2gaps <- gaps(cis2cna.opto, min.size = 0, gain = log2(2.5/2),
+   loss = log2(1.5/2), min.probes = 1)
```

Perform test on ranks

```
> opto.1p <- vector()
> opto.1p[1] <- cor(mip1tel.tmp[, 1], mip2tel.tmp[, 1], method = "spearman")
> opto.1p[2] <- cor(mip1tel.tmp[, 3], mip2tel.tmp[, 3], method = "spearman")
> opto.1p[3] <- cor(mip1tel.cna.tmp[, 3], mip2tel.cna.tmp[, 3],
+   method = "spearman")
> opto.1p[4] <- cor((mip1gaps[, 5] - mip1tel.cna.tmp[, 3]), (mip2gaps[,
+   5] - mip2tel.cna.tmp[, 3]), method = "spearman")
> opto.1p[5] <- cor(mip1tel.cna.tmp[, 5], mip2tel.cna.tmp[, 5],
+   method = "spearman")
> opto.1p[6] <- cor((mip1gaps[, 6] - mip1tel.cna.tmp[, 5]), (mip2gaps[,
+   6] - mip2tel.cna.tmp[, 5]), method = "spearman")
> names(opto.1p) <- c("NtAI", "NiAI", "NtGain", "NiGain", "NtLoss",
+   "NiLoss")
> opto.1p
```

```
      NtAI      NiAI      NtGain      NiGain      NtLoss      NiLoss
0.9486833 0.3162278 0.8333333 0.4000000 0.9486833 0.8000000
```

```
> sum(opto.1p)
```

```
[1] 4.246928
```

Now test if the ranks are improved by using different numbers of proportional probes:

```

> cis.opto <- matrix(NA, nrow = 10, ncol = 6)
> colnames(cis.opto) <- c("NtAI", "NiAI", "NtGain", "NiGain", "NtLoss",
+   "NiLoss")
> count <- 0
> for (i in seq(5, 50, by = 5)) {
+   cat(i)
+   count <- count + 1
+   mip1tel.tmp <- no.tel(cis1mcp.opto, chrominfo = chrominfo,
+     min.size = 0, min.probes = i)
+   mip2tel.tmp <- no.tel(cis2mcp.opto, chrominfo = chrominfo,
+     min.size = 0, min.probes = (i * 8))
+   mip1tel.cna.tmp <- no.tel.cna(cis1cna.opto, chrominfo = chrominfo,
+     min.size = 0, gain = log2(2.5/2), loss = log2(1.5/2),
+     min.probes = i)
+   mip2tel.cna.tmp <- no.tel.cna(cis2cna.opto, chrominfo = chrominfo,
+     min.size = 0, gain = log2(2.5/2), loss = log2(1.5/2),
+     min.probes = (i * 8))
+   mip1gaps <- gaps(cis1cna.opto, min.size = 0, gain = log2(2.5/2),
+     loss = log2(1.5/2), min.probes = i)
+   mip2gaps <- gaps(cis2cna.opto, min.size = 0, gain = log2(2.5/2),
+     loss = log2(1.5/2), min.probes = (i * 8))
+   cis.opto[count, 1] <- cor(mip1tel.tmp[, 1], mip2tel.tmp[,
+     1], method = "spearman")
+   cis.opto[count, 2] <- cor(mip1tel.tmp[, 3], mip2tel.tmp[,
+     3], method = "spearman")
+   cis.opto[count, 3] <- cor(mip1tel.cna.tmp[, 3], mip2tel.cna.tmp[,
+     3], method = "spearman")
+   cis.opto[count, 4] <- cor((mip1gaps[, 5] - mip1tel.cna.tmp[,
+     3]), (mip2gaps[, 5] - mip2tel.cna.tmp[, 3]), method = "spearman")
+   cis.opto[count, 5] <- cor(mip1tel.cna.tmp[, 5], mip2tel.cna.tmp[,
+     5], method = "spearman")
+   cis.opto[count, 6] <- cor((mip1gaps[, 6] - mip1tel.cna.tmp[,
+     5]), (mip2gaps[, 6] - mip2tel.cna.tmp[, 5]), method = "spearman")
+ }
5101520253035404550
> rownames(cis.opto) <- seq(5, 50, by = 5)
> cis.opto <- cbind(cis.opto, apply(cis.opto, 1, sum))
> colnames(cis.opto)[7] <- "Sum"
> cis.opto

```

|    | NtAI      | NiAI      | NtGain    | NiGain | NtLoss    | NiLoss    | Sum      |
|----|-----------|-----------|-----------|--------|-----------|-----------|----------|
| 5  | 0.9486833 | 0.6000000 | 0.4000000 | 0.8    | 1.0000000 | 1.0000000 | 4.748683 |
| 10 | 0.8000000 | 0.7378648 | 0.6324555 | 0.8    | 1.0000000 | 1.0000000 | 4.970320 |
| 15 | 0.8000000 | 0.9486833 | 0.6324555 | 0.8    | 0.9486833 | 1.0000000 | 5.129822 |
| 20 | 0.8000000 | 0.9486833 | 0.6324555 | 0.8    | 0.8000000 | 1.0000000 | 4.981139 |
| 25 | 0.8000000 | 0.9486833 | 1.0000000 | 0.8    | 0.8000000 | 1.0000000 | 5.348683 |
| 30 | 0.8000000 | 0.7378648 | 0.9486833 | 0.8    | 0.8000000 | 1.0000000 | 5.086548 |
| 35 | 0.8000000 | 0.7378648 | 0.7745967 | 1.0    | 0.8000000 | 1.0000000 | 5.112461 |
| 40 | 0.8000000 | 0.7378648 | 1.0000000 | 1.0    | 0.8000000 | 1.0000000 | 5.337865 |
| 45 | 0.8000000 | 0.7378648 | 1.0000000 | 1.0    | 0.8000000 | 1.0000000 | 5.337865 |
| 50 | 0.8000000 | 0.7378648 | 1.0000000 | 1.0    | 0.8000000 | 0.9486833 | 5.286548 |

A proportional number of probes, starting at 25 probes in cisplatin-1 seems to show the greatest consistency

```

> par(las = 1)
> plot(rownames(cis.opto), cis.opto[, 7], pch = 16, main = "Probe optimization",
+      ylab = "Summarized Spearman r", xlab = "Probes in Cisplatin-1")
> points(rownames(cis.opto)[which(cis.opto[, 7] == max(cis.opto[,
+      7]))], max(cis.opto[, 7]), col = 2, pch = 16)
> legend("bottomright", legend = paste("Optimum probes in Cisplatin-1:",
+      rownames(cis.opto)[which(cis.opto[, 7] == max(cis.opto[,
+      7]))]), pch = 16, col = 2)

```

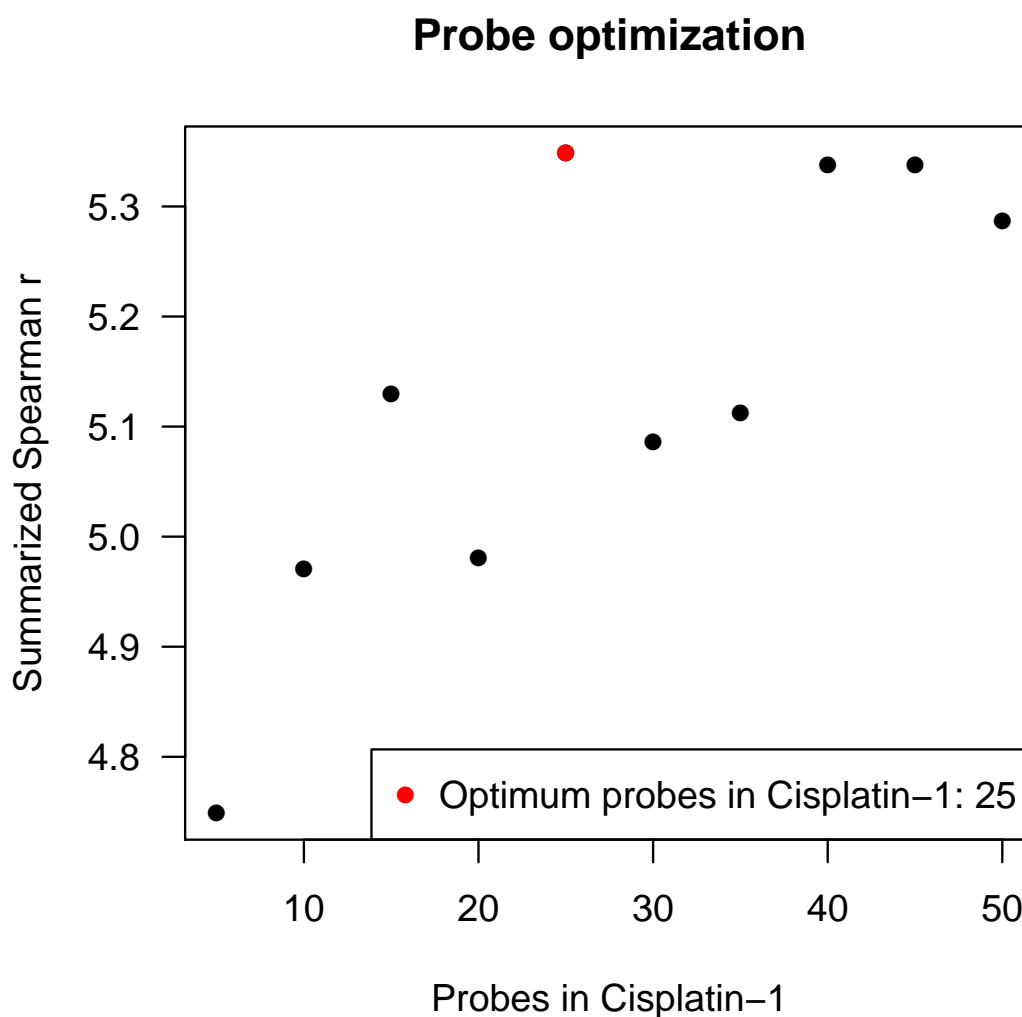

Using our technical replicates we determined the minimum probe number that gives the highest concordance of interstitial and telomeric AI/CNA calls by using proportional probe numbers.

We assumed that both platforms should detect the same pattern of genomic aberrations and observed differences are due to the differential probe coverage of the genome on the two platforms, which are corrected by the appropriate selection of minimum probe number.

## 9 Session info

The results in this file are generated using the following packages:

```
> sessionInfo()
```

```
R version 2.13.2 (2011-09-30)
```

```
Platform: x86_64-apple-darwin9.8.0/x86_64 (64-bit)
```

```
locale:
```

```
[1] C
```

```
attached base packages:
```

```
[1] grid      stats      graphics  grDevices  utils      datasets  methods
```

```
[8] base
```

```
other attached packages:
```

```
[1] boot_1.3-2          jetset_0.99.3      RSQLite_0.9-4      DBI_0.2-5
[5] cluster_1.14.0     quantsmooth_1.18.0 lodplot_1.1         quantreg_4.69
[9] SparseM_0.89       DNACopy_1.26.0     ROC_1.28.0         gplots_2.8.0
[13] caTools_1.12       bitops_1.0-4.1     gdata_2.8.1        gtools_2.6.2
[17] beeswarm_0.1.1     genefilter_1.34.0  squash_0.3.1       affy_1.30.0
[21] Biobase_2.12.1
```

```
loaded via a namespace (and not attached):
```

```
[1] AnnotationDbi_1.14.1 affyio_1.20.0      annotate_1.30.0
[4] org.Hs.eg.db_2.5.0   preprocessCore_1.14.0 splines_2.13.2
[7] survival_2.36-9     tools_2.13.2      xtable_1.5-6
```

```
> system("uname -a", intern = TRUE)
```

```
[1] "Darwin njuul 11.2.0 Darwin Kernel Version 11.2.0: Tue Aug 9 20:54:00 PDT 2011; root:xnu-169
```
